# Supplementary material for: Evaluating practical support stroke survivors get with medicines and unmet needs in primary care: a survey
Source: PubMed Central journal article supplement (PMC5855212; doi:10.1136/bmjopen-2017-019874), 2018-03-11
Supplement: bmjopen-2017-019874.draft_revisions.pdf [file bmjopen-2017-019874.draft_revisions.pdf]

# BMJ Open

BMJ Open is committed to open peer review. As part of this commitment we make the peer review history of every article we publish publicly available.

When an article is published we post the peer reviewers' comments and the authors' responses online. We also post the versions of the paper that were used during peer review. These are the versions that the peer review comments apply to.

The versions of the paper that follow are the versions that were submitted during the peer review process. They are not the versions of record or the final published versions. They should not be cited or distributed as the published version of this manuscript.

BMJ Open is an open access journal and the full, final, typeset and author-corrected version of record of the manuscript is available on our site with no access controls, subscription charges or pay-per-view fees (<http://bmjopen.bmj.com>).

If you have any questions on BMJ Open's open peer review process please email [info.bmjopen@bmj.com](mailto:info.bmjopen@bmj.com)

# BMJ Open

## Evaluating support stroke survivors get with medicines and unmet needs in primary care: A survey

|                               |                                                                                                                                                                                                                                                                                                                                                                                                                                                                   |
|-------------------------------|-------------------------------------------------------------------------------------------------------------------------------------------------------------------------------------------------------------------------------------------------------------------------------------------------------------------------------------------------------------------------------------------------------------------------------------------------------------------|
| Journal:                      | <i>BMJ Open</i>                                                                                                                                                                                                                                                                                                                                                                                                                                                   |
| Manuscript ID                 | bmjopen-2017-019874                                                                                                                                                                                                                                                                                                                                                                                                                                               |
| Article Type:                 | Research                                                                                                                                                                                                                                                                                                                                                                                                                                                          |
| Date Submitted by the Author: | 02-Oct-2017                                                                                                                                                                                                                                                                                                                                                                                                                                                       |
| Complete List of Authors:     | JAMISON, JAMES; UNIVERSITY OF CAMBRIDGE, PUBLIC HEALTH & PRIMARY CARE<br>Ayerbe, Luis; Queen Mary University of London, Centre for Primary Care and Public Health<br>Di Tanna, Gian Luca; Queen Mary University of London<br>Sutton, Stephen; University of Cambridge,<br>Mant, Jonathan; University of Cambridge, General Practice and Primary Care Research Unit<br>De Simoni, Anna; Queen Mary University of London, Centre for Primary Care and Public Health |
| Keywords:                     | Medication adherence, Caregivers, Barthel, STROKE MEDICINE                                                                                                                                                                                                                                                                                                                                                                                                        |
|                               |                                                                                                                                                                                                                                                                                                                                                                                                                                                                   |

SCHOLARONE™  
Manuscripts

1  
2  
3 **Evaluating support stroke survivors get with medicines and unmet needs in primary**  
4 **care: A survey**  
5  
6  
7

8  
9 \*James Jamison<sup>1</sup>, MSc

10 Luis Ayerbe<sup>2</sup>, PhD

11 Gian Luca Di Tanna<sup>2</sup> PhD

12 Stephen Sutton<sup>1</sup>, PhD

13 Jonathan Mant<sup>1</sup>, MD

14 Anna De Simoni<sup>2</sup>, PhD  
15  
16  
17  
18  
19  
20  
21  
22  
23  
24

25 <sup>1</sup>Primary Care Unit, Department of Public Health & Primary Care, Forvie Site, University of Cambridge  
26 School of Clinical Medicine, Box 113 Cambridge Biomedical Campus, Cambridge, CB2 0SR.  
27

28 <sup>2</sup>Centre for Primary Care and Public Health, Barts and The London School of Medicine and Dentistry, Yvonne  
29 Carter Building, London E1 2AB.  
30  
31  
32  
33  
34  
35  
36  
37

38 \*corresponding author: James Jamison; Tel: +44 (0)1223 768272. Fax: +44 (0)1223 763492. Email:

39 jj285@medschl.cam.ac.uk  
40  
41  
42  
43  
44  
45  
46  
47  
48  
49  
50  
51  
52  
53  
54  
55  
56  
57  
58  
59  
60

## Abstract

### Objectives

To design a questionnaire and use it to explore unmet needs with practical aspects of medicines taking after stroke, predictors of medicine taking and to estimate the proportion of survivors who get support with daily medication taking.

### Design

Four workshops with stroke survivors and caregivers to design the questionnaire.

A cross-sectional postal questionnaire in primary care.

### Setting

18 GP practices in the East of England and London. Questionnaires posted between September 2016 and February 2017.

### Participants

1687 stroke survivors living in the community outside institutional long term care.

### Primary Outcome measures

The proportion of community stroke survivors receiving help from caregivers for practical aspects of medicine taking; the proportion with unmet needs in this respect; the predictors of experiencing unmet needs and missing taking medications.

### Results

A 5-item questionnaire was developed to cover the different aspects of medicine taking. 596/1687 (35%) questionnaires were returned. 56% reported getting help in at least one aspect of taking medication and 11% needing more help. 33% reported missing taking their medicines. Unmet needs were associated with receiving help with medications (OR: 5.6,  $p<0.001$ ), being on a higher number of medications (OR: 1.2,  $p<0.001$ ) and being dependent for activities of daily living (ADL) (OR: 4.9,  $p=0.001$ ). Missing medication was associated with having unmet needs (OR: 5.1,  $p<0.001$ ), receiving help with medications (OR: 2.1,  $p<0.001$ ), being on a higher number of medicines (OR: 1.1,  $p=0.008$ ) and being older than 70 years (OR: 0.6,  $p=0.006$ ).

## Conclusions

More than half of patients who replied needed help with taking medication and 1 in 10 had unmet needs in this regard. Stroke survivors dependent on others have more unmet needs, more likely to miss medicines and might benefit from focused clinical and research attention. Novel primary care interventions focusing on the practicalities of taking medicines are warranted.

Abstract word count- 298

Keywords: Stroke, Medication Adherence, Caregivers, Barthel

## Article summary

### Strengths and Limitations

- A 5-item questionnaire was developed to evaluate the help stroke survivors get with daily medication taking, based on patients' and caregivers' own views gathered through workshops.
- The questionnaire was sent to 1,687 stroke survivors in 18 GP practices across two UK regions.
- This work identified issues from a population that includes patients severely affected by stroke, who are often excluded from research. Results shed light on the effect of stroke related impairments on practical domains and predictors of medicine taking, which have significant effects on overall adherence and call for new primary care interventions.
- The low response rate reported is a limitation of this study and stroke survivors who are harder to reach may have been missed.

**Funding:** This study was funded by the RCGP SFB, Ref. SFB 2014 – 15 'Quantifying the support stroke survivors get with daily medication taking: a questionnaire survey'. Anna De Simoni and Luis Ayerbe are funded by a NIHR Academic Clinical Lectureships. This article therefore presents independent research funded by NIHR. The views expressed are those of the authors and not necessarily those of the NHS, the NIHR, or the Department of Health. James Jamison was supported by a research grant from The Stroke Association and the British Heart Foundation: TSA BHF 2011/01

1  
2  
3 Data sharing statement: No additional data available.  
4  
5  
6

## 7 8 Introduction 9

10  
11 For many older adults remaining independent at home may depend on how well they can manage  
12 complex medication regimens.<sup>1,2</sup> Around half of stroke survivors are dependent on others for everyday  
13 activities.<sup>3</sup> Stroke is the leading cause of disability in developed countries, with an estimated that 25-74% of  
14 the 50 million stroke survivors worldwide requiring some assistance or being fully dependent on caregivers for  
15 activities of daily living (ADL's).<sup>4-6</sup>  
16  
17  
18  
19  
20

21 There is evidence that being dependent for ADL's and impairment in mobility and communication  
22 decrease medication adherence in patients suffering from hypertension.<sup>7</sup> Deficits in attention, cognition or  
23 working memory have been linked with non-adherence to medications in other patient groups.<sup>8</sup> In a recent  
24 systematic review of medication adherence among patients with cognitive impairment, one third of studies  
25 showed that such patients were likely to have a caregiver to assist with medications and there was an  
26 association between taking four or more medicines and nonadherence.<sup>9</sup> In patients taking cardiovascular  
27 medicines, multiple factors including cognitive problems, lack of social support, dosing regimen, as well as  
28 practical problems and difficulties accessing services, contribute to poor medication adherence.<sup>10, 11</sup> Low  
29 adherence to secondary prevention medication is associated with poor cardiovascular health.<sup>12, 13</sup>  
30  
31  
32  
33  
34  
35  
36  
37  
38

39 Stroke survivors have previously reported difficulties in the handling of medication as a barrier to  
40 adherence to secondary prevention medication after stroke.<sup>14</sup> Research on medication adherence in stroke has  
41 identified multiple barriers to medication taking among stroke survivors.<sup>14-16</sup> However interventions developed  
42 to improve adherence have mainly concentrated on patients responsible for their own medicine taking.<sup>17, 18</sup>  
43  
44  
45  
46

47 In elderly patients in particular, cognitive deficits, taking large number of medicines and the  
48 complexity of medication regimens have been identified as barriers to medication adherence.<sup>19, 20</sup> Caregivers  
49 are known to play a key role in providing assistance to older people in a range of daily activities including  
50 medication taking and physician visits,<sup>21</sup> and can help improve adherence in cardiac patients with memory  
51  
52  
53  
54  
55  
56  
57  
58  
59  
60

1  
2  
3 problems.<sup>22</sup> However, the proportion of community stroke survivors relying on caregivers for some, or all  
4 aspects of medicine taking, is not known.  
5

6  
7 Survivors of stroke have previously reported unmet needs including physical difficulties, cognitive  
8 and emotional difficulties, information needs and other unmet needs.<sup>23 24</sup> However we know little about factors  
9 that influence medication taking among stroke survivors with disabilities living in the community (i.e. not in  
10 nursing homes), their unmet needs around the use of medicines or the proportion relying on caregivers for  
11 some or all aspects of medicines taking.  
12

13  
14 To date, survey instruments examining the unmet needs of stroke survivors have not focused on aspects of  
15 medication taking.  
16

17  
18 The aims of this investigation were to design an instrument to evaluate the help stroke survivors get  
19 with taking their medicines, characterise patients receiving help with medications, estimate the proportion who  
20 have unmet needs with daily medicine taking and who miss medications. We additionally aimed to identify the  
21 predictors of missing medicines and of experiencing unmet needs with medications.  
22

23  
24 This knowledge can inform the development of primary care interventions aimed at improving medication  
25 taking in this patients' group.  
26

## 27 28 29 30 31 32 33 34 35 36 37 38 39 40 41 42 43 44 45 46 47 48 49 50 51 52 53 54 55 56 57 58 59 60

### Methods

#### Questionnaire development workshops

To develop the questionnaire, three workshops were conducted with 26 stroke survivors and 12 caregivers in the East of England (St John's College, Cambridge 2009<sup>25</sup>: 7 patients, 1 caregiver; Different Stroke, Cambridge 2012: 9 patients, 3 caregivers; Peterborough, 2012: 10 patients, 8 caregivers). Recruitment was opportunistic and no purposive sampling was applied.

The survey questions were developed through thematic analysis<sup>26</sup> of workshops field notes.

A fourth workshop was conducted to gather feedback on the questionnaire using a PPI (Patient and Public Involvement) exercise with 11 stroke survivors and 3 caregivers recruited through a local stroke group (Different Strokes, East of England). Two stroke survivors from this group took part in subsequent 'think-

1  
2  
3 aloud' interviews, which involved talking out loud as they read the questionnaire, continually verbalising what  
4 they were thinking.  
5

### 6 **Postal survey**

7  
8  
9 General practices in primary care in the East of England and London were approached through the  
10 Clinical Research Network (CRN). CRN Eastern contacted 20 GP practices, of which 11 replied and took part  
11 in the study. CRN North London contacted 140 GP East London practices by email (Tower Hamlets, Newham  
12 and City & Hackney CCGs), of which only two replied and participated in the study. Five of the eight GP  
13 practices contacted in North London (Barnet CCG) through a research coordinator took part in the study.  
14  
15  
16  
17

18 Patients with stroke and their caregivers were sent the postal questionnaire according to the following criteria  
19  
20  
21

#### 22 Inclusion Criteria

23  
24 Patients:

25  
26 All patients aged > 18 on the practice stroke register with documented history of stroke.  
27  
28

29 Caregivers:

- 30  
31
- 32 • Anyone identified by the patient as being a caregiver and having a role helping with medicine taking.
- 33

#### 34 Exclusion Criteria

- 35  
36
- 37 • Patients who suffered a Transient ischaemic attack (TIA) but not a stroke.
  - 38 • Palliative or end of life patients.
  - 39 • Patients receiving institutional long term care (receiving total care in residential homes or living in  
40 nursing homes).
- 41  
42  
43  
44

### 45 **Survey participant identification**

46  
47 A list of prospective patients was compiled from the stroke register of each surgery by the practice  
48 staff. No restriction was placed on the recruitment of survivors experiencing who were dependent for ADL's  
49 or lacking capacity. The list was screened by a practice GP and anyone not meeting the inclusion criteria or  
50 whom the GP considered unsuitable for the study (e.g. terminally ill) was excluded.  
51  
52  
53  
54

### 55 **Survey participant recruitment**



1  
2  
3 Eligible participants were sent a study survey pack by practice staff between September 2016 and  
4 February 2017. Study recruitment packs included two invitation letters, patient information sheets,  
5 questionnaires and postal version of Barthel Index<sup>27</sup>, one of which was for completion by the patient and the  
6 other by the caregiver. The Barthel Index provides a measure of functional independence and physical  
7 functioning and has been used in stroke research previously.<sup>28</sup> Patients with Barthel score <20 were  
8 categorised as dependent for ADLs/disabled. If receiving help with medications, the patient was asked to pass  
9 to their caregiver the invitation letter and information sheet and invite him/her to complete their copy of the  
10 questionnaire, providing answers on the patient's medicine taking. Family members, friends or paid caregivers  
11 of stroke survivors who were severely disabled and/or lacked mental capacity were invited to fill and return  
12 the caregivers' questionnaires only on behalf of patients. The information sheets stated that consent was  
13 implied by returning the completed questionnaire. Participants were asked to return completed questionnaires  
14 to the research centre in the FREEPOST envelopes provided. A second mail out of the study invitation pack  
15 was sent to all patients as a reminder, 2 weeks after the first one.  
16  
17  
18  
19  
20  
21  
22  
23  
24  
25  
26  
27  
28  
29

### 30 **Ethical approval**

31  
32  
33 This study has received ethical approval from Cambridge Central Research Ethics Committee (REC reference:  
34 16/EE/0182) and from the Health Research Authority (IRAS project ID:170931)  
35  
36  
37  
38

### 39 **Survey Analysis**

40  
41 Survey data entry was performed by Document Capture Company.<sup>29</sup> Individual patients' characteristics (age,  
42 gender, time since stroke, number of daily medicines) were collected from the questionnaires themselves.  
43  
44 Practice population, number of patients on stroke registers, deprivation score and ethnicity were taken from the  
45 National General Practice profiles (<https://fingertips.phe.org.uk/profile/general-practice>). The proportions of  
46 patients in each sociodemographic category, needing help taking medication, missing any medication in the  
47 previous 30 days, and reporting the need for more help taking medication, were estimated. When the survivor  
48 and caregiver questionnaires were both returned together, study data were collected from the patient's  
49 questionnaire only.  
50  
51  
52  
53  
54  
55  
56  
57  
58  
59  
60

1  
2  
3 Multivariable logistic regression analysis was fitted to estimate associations between ‘Unmet needs’  
4 and the variables: age  $<$  or  $\geq 70$  years, gender, total number of medicines taken, dependence for ADL, years  
5 since stroke, and receiving help with medicines. In the model each domain of help with medicine was  
6 estimated individually and then combined. A second multivariable logistic regression examined the  
7 association between ‘Missed medicines in the previous 30 days’ and the variables: age  $<$  or  $> 70$  years, gender,  
8 total number of medicines taken, dependent for ADL, years since stroke, help with medicines and unmet  
9 needs. Regression models were adjusted for age, gender and variable of interest. All statistical analysis have  
10 been conducted with Stata (version 14, StataCorp LP, College Station, TX, USA, 2013).  
11  
12  
13  
14  
15  
16  
17  
18  
19  
20

## 21 Results

### 22 Questionnaire development

23  
24  
25  
26 Taking medications emerged as an important issue in all three workshops: nearly half of patients  
27 stated that a family member or friend was supporting them with daily medicine routines especially in relation  
28 to prompting medicine taking. This was put down to effects of the stroke itself on memory retention rather  
29 than general memory problems that people without stroke also experience. They admitted missing doses due to  
30 forgetting. Only a small proportion of survivors were actually handling their own prescriptions and were  
31 relying on support from family and/or community services. In one workshop almost all survivors had Dosette  
32 medication boxes and agreed that taking medications out of safety bottles and blister packs was a problem due  
33 to physical disabilities.  
34  
35  
36  
37  
38  
39  
40  
41  
42

43 Thematic analysis of workshop data revealed five main practical domains of support needed with  
44 medication taking: 1) Dealing with prescriptions and collection of medicines; 2) Getting medicines out of the  
45 box, blister packs or bottles; 3) Prompting ‘It’s time to take your medicine’; 4) Swallowing medicines; and 5)  
46 Checking whether medicines have been taken. The final study questionnaire (see Supplementary file 1)  
47 included questions relating to each of these five domains, one item related to adherence (missed medicine in  
48 the last 30 days) and an assessment of disabilities through completion of the validated postal version of the  
49 Barthel Index.<sup>27</sup> The questionnaire was adapted for caregivers (see Supplementary file 2).  
50  
51  
52  
53  
54  
55  
56  
57  
58  
59  
60

### Questionnaire finalisation

On the basis of the fourth workshop and two 'think-aloud' interviews, we reworded the survey questions (e.g. from 'Do you get help with' was changed into 'Is somebody helping you with') and used a scale response 'All the time', 'Often', 'Sometimes', 'Rarely', 'Never' for the first question of each of the five survey domains, which was originally conceived as a 'yes' or 'no' answer (see table 2 for text of questions).

### Survey

#### Practice characteristics

18 GP practices agreed to take part in the study, of which just over 1/3 were in London (n=7). GP practices were relatively large with an average population of 11,904 patients (SD = 4010) and a low to moderate level of deprivation (Index of Multiple Deprivation<sup>30</sup> (IMD): Mean-7.05: SD-3.19). Out of 3066 patients on the stroke registers, 1687 stroke patients (55%) were considered eligible for the study and received the postal questionnaire. The average response rate of East of England and London practices was 42% and 27% respectively. The response rate varied between 16% and 53% across practices.

#### Participant characteristics

596 participants returned a completed questionnaire [549 (92.4%) from patients, 45 (7.6%) from caregivers] showing a mean response rate of 35% (0.33-0.37). Participants were on average 72.7yrs old. 37.8% (n=210) of the sample were female and 62.2% male (n=346), see table 1. The mean number of years since stroke was 7.7 and participants took an average of 6 different medicines a day. There were a high proportion of white patients in the recruited practices which were on average 21% of mixed or ethnic minority background. Approximately 23% of study participants were completely independent for ADL.

Participants getting any kind of help with medicines were on average 73.6 years old, two thirds were male, had a stroke approximately 8 years previously and were taking on average 1 extra medication a day. Only 19% of this group were completely independent for ADL, see second part of table 1.

Table 1 here

### Support with daily medication taking

Table 2 shows the mean responses to the survey questions quantifying the help participants receive with medicines and unmet needs. Overall, 55.7% (95% CI: 51.7-59.7) of the participants received help in at least one aspect of taking medication, in that they ticked one of the options from 'all the time' to 'rarely' on one or more of the five questions related to medicine taking. 11.4% (95% CI: 8.8-13.9) of patients reported experiencing unmet needs and needing more help with at least one of the aspects of taking medication, in that they ticked 'yes' to the question "do you feel you need more help", on one or more of the five questions related to medicine taking.

Among participants help was needed to some degree with prescriptions and collection of medicines (49.7%), getting medicines out of the box or packet (27.9%), reminding to take medicines (36.4%), swallowing medicines (20.2%) and checking that medicines have been taken (34.2%). Being reminded to take medicines, dealing with prescriptions and collection of medicines and getting medicines out of a pack or bottle were the most commonly reported areas of unmet needs. Almost two thirds of participants (65.3%) reported never missing medicines in the last 30 days. Out of the 34.7% of patients who said they missed taking medicine at any point in the previous 30 days, 23.9% said rarely, 9.3% sometimes, 0.8% often and 0.7% all the time.

Table 2 here

### Factors associated with unmet needs

Being on a higher total number of daily medications (OR: 1.2, (1.1-1.3),  $p < 0.001$ ), dependent for ADL (OR: 4.9, (1.9-13.0),  $p = 0.001$ ) and receiving any kind of help (OR: 5.6, (2.7-11.63),  $p < 0.001$ ) in relation to taking medication was associated with experiencing unmet needs. Getting help with swallowing medicines (OR: 6.8, (3.8-12.02),  $p < 0.001$ ), getting medicines out of a box, blister packs or bottles (OR: 6.5,

(3.6-11.8),  $p<0.001$ ) showed the strongest associations with experiencing unmet needs. However age, gender, and number of years since stroke showed no significant association with unmet needs (see table 3).

Table 3 here

### **Factors associated with missing medications**

Being older (age  $\geq 70$ ) was associated with a lower probability of missing medication (OR: 0.59 (0.41-0.86)  $p=0.006$ ). Being on a higher number of daily medicines (polypharmacy) (OR:1.07 (1.02-1.12),  $p=0.008$ ) and getting any kind of help with medicine taking (OR:2.08 (1.43-3.03)  $p<0.001$ ) was associated with higher probability of missing medicines. The more unmet needs stroke survivors had with taking medication, the more likely they were to miss their medicines (OR:5.3 (2.9-9.5),  $p<0.001$ ). Gender, dependence for ADL's and number of years since stroke showed no significant association with missing medicines (see table 4).

Table 4 here

## **Discussion**

### **Summary of findings**

From workshops we identified 5 key issues that patients regarded as important with medication taking after stroke. We converted these into a five item questionnaire that we distributed to people on stroke registers in 18 general practices. We obtained a response rate of 35%. Among respondents, 56% of survivors in the community were receiving help in some aspect of daily medication taking, 11% reported needing more help in at least one domain of medicine taking and 33% missed taking their medicines at some point in the previous 30 days.

1  
2  
3 A higher total number of daily medicines, being dependent for ADLs and receiving help with  
4 medication were predictors of experiencing at least one unmet need in respect of medication taking. Stroke  
5 survivors who were younger, taking a higher number of daily medicines and experiencing a greater number of  
6 unmet needs were more likely to miss medications.  
7  
8

9  
10 This work identified issues from a population that includes patients severely affected by stroke, who are often  
11 excluded from research.<sup>17</sup> Results presented here shed light on the effect of stroke related impairments on  
12 practical domains and predictors of medicine taking, which are shown to have significant effects on overall  
13 adherence.  
14  
15  
16  
17

### 18 19 20 **Strengths and limitations**

21  
22 A strength of this study is that the questionnaire was developed from patients' and caregivers' own  
23 views gathered through workshops. Although not recruited through purposive sampling, workshop participants  
24 suffered from a range of stroke related impairments, as highlighted by the reported use of Dossette boxes,  
25 dependence on others for aspects of medicine taking like prompting medication times, and dependence for  
26 ADL's such as collecting prescriptions and taking tablets out of boxes. In the actual postal survey, the  
27 inclusion of stroke survivors regardless of level of dependence for ADL's permitted investigating a population  
28 who are understudied,<sup>17</sup> yet may have significant unmet needs that can affect their adherence to medications.  
29  
30 This investigation highlights caregivers' role in managing medicines in survivors dependent for ADLs.  
31  
32  
33  
34  
35  
36  
37

38 However, study limitations should also be considered. The response rate across recruited GP practices  
39 was low and harder to reach stroke survivors may have been missed. This is a source of bias that might affect  
40 our estimates. Through the Barthel score, we did not assess cognition directly, although low cognitive function  
41 is associated with poor adherence.<sup>31</sup> We did not collect information on the use of blister packaged medication  
42 or devices to aid compliance, which could have influenced medication taking practices. Finally this study  
43 examined all medicine taking and did not differentiate between stroke secondary prevention medications and  
44 other drug categories.  
45  
46  
47  
48  
49  
50  
51  
52  
53

### 54 **Comparisons with existing research**

1  
2  
3 To our knowledge this is the first study that shows that more than half of all stroke survivors get help  
4 with some aspect of medicine taking and that those receiving help are more likely to have unmet needs. This  
5 provides some insight in to why adherence to medication in stroke survivors may be poor.<sup>32</sup>  
6  
7

8  
9 Moreover, the greater the number of medicines, the more likely stroke survivors were to miss  
10 medications. Addressing pill burden by simplifying drug regimens may be an important focus for future  
11 interventions. Indeed the polypill approach to medication taking has been shown to reduce cardiovascular as  
12 well as total pill burden in a primary care setting.<sup>33</sup> Simpler dosing regimens, are known to be associated with  
13 better medication adherence<sup>34</sup> while fewer medicines has been shown to be an independent predictor of long  
14 term medication persistence among stroke survivors.<sup>35 36</sup> A recent trial incorporating a fixed-dose combination  
15 polypill approach to taking cardiovascular medicine demonstrated better adherence among patients receiving a  
16 single pill.<sup>37</sup>  
17  
18  
19  
20  
21  
22  
23

24 Receiving help with prescriptions and collecting medicines was identified as the area where most help  
25 was received (49.7% of respondents). Stroke survivors who are dependent for activities of daily living may  
26 face considerable practical challenges accessing health care resources at the pharmacy and the GP practice. A  
27 recent study in the USA found that around 2/3 of caregivers were involved in at least 1 medication  
28 management activity of elderly patients and that high involvement in Instrumental Activities of Daily Living  
29 (IADLs) was associated with the caregiver providing the patient with assistance in ordering medicines.<sup>38</sup>  
30 Filling prescriptions is also known to be an important factor influencing medication adherence.<sup>39 40</sup> Indeed  
31 caregivers can play a significant role in ensuring appropriate medication taking. A recent interview study  
32 exploring potential barriers and facilitators of medication adherence in stroke identified the central role of the  
33 caregiver in medication adherence.<sup>41</sup> Our evaluation of an online stroke forum also confirmed the important  
34 role of the caregiver in facilitating medication adherence.<sup>14</sup> Monitoring prescription collections, liaising with  
35 the GP and pharmacy, increasing the time between prescriptions or arranging medication deliveries, may help  
36 to address prescription needs.  
37  
38  
39  
40  
41  
42  
43  
44  
45  
46  
47  
48  
49

50 Around 11% of stroke survivors reported unmet medication needs. We found that stroke survivors  
51 dependent for ADLs and receiving help with medicines were more likely to report unmet needs, which is in  
52 line with a recent study investigating stroke/TIA survivors in Australia, where greater functional ability was  
53 associated with fewer unmet needs, including those related to secondary prevention.<sup>42</sup> In previous research on  
54  
55  
56  
57  
58  
59  
60

1  
2  
3 unmet needs among stroke survivors, a 44 item survey study by McKevitt and colleagues (2011) reported that  
4 49% of stroke survivors had at least one unmet need<sup>24</sup>, while in a study of Australian survivors who  
5 completed a 58 item survey, the percentage was 84%.<sup>23</sup> Both these studies however examined unmet needs  
6 over a variety of domains including health, work, leisure and everyday living, social support and finances,  
7 whereas our study focused on medication needs only.  
8  
9  
10  
11

12 Getting help to take medicines out of a box, packet or bottle was the area where the greatest proportion  
13 of stroke survivors needed help all of the time. We previously found that the use of pill boxes and blister  
14 packed medication to be both a facilitator<sup>35</sup> and a barrier<sup>14</sup> to adherence among stroke survivors<sup>15</sup>, while  
15 interventions using blister packaging and pill boxes have been found to be associated with improved  
16 adherence.<sup>43</sup> Although electronic medication devices were considered potentially effective in improving  
17 medication taking behaviour among patients with cognitive impairments, success in using such devices was  
18 dependent on the patient having a good level of dexterity, while removing the medication from these devices  
19 was also found to be challenging.<sup>44 45 46</sup>  
20  
21  
22  
23  
24  
25  
26  
27

28 The need for further support in this domain, as reported in the current study, suggests that handling  
29 medications remains problematic for stroke survivors.  
30  
31

32 An interesting finding from this survey study is that stroke survivors who missed medicines were  
33 younger. This is consistent with other research on adherence in stroke that found that younger age was  
34 predictive of poor adherence<sup>47</sup>, and has also been described in patients taking medication for cardiovascular  
35 disease.<sup>48</sup> The finding in the present study contrasts with the view that older patients are more likely to face  
36 difficulties taking medication<sup>49 50</sup> which is frequently attributed to higher number of pre-existing comorbidities  
37 resulting in polypharmacy and increased complexity of medication taking regimens. The fact that older  
38 patients may be less likely miss medicine might be down to the support they receive from caregivers. Our  
39 findings suggests that support needed with medications may be overlooked in younger stroke survivors.<sup>51</sup>  
40  
41  
42  
43  
44  
45  
46  
47

48 In this study a significant proportion of patients admitted missing medications occasionally. There is  
49 evidence that improving adherence by one anti-hypertensive pill/week for a once-a-day regimen reduces the  
50 hazard of stroke by 8–9 % and death by 7 %.<sup>52</sup> Each incremental 25% increase in proportion of days covered  
51 with statin medications is associated with a 0.10 mmol/L reduction in LDL-C cholesterol.<sup>53 54</sup> Non-adherence  
52 to cardiovascular medications is associated with increased risk of morbidity and mortality.<sup>55</sup>  
53  
54  
55  
56  
57  
58  
59  
60



### Implications for clinical practice

A significant proportion of patients, particularly those who take large numbers of tablets, are disabled or receive help to take medication, have unmet needs and miss their tablets, which can increase risk of recurrent cardiovascular events. These particularly vulnerable groups of patients might benefit from focused clinical attention. Through understanding the needs of survivors and caregivers in different aspects of daily medication taking, we can help direct future resources to the areas of greatest need. For example, further exploration of medication packaging is warranted to understand the difficulties stroke survivors face handling medicines. Polypharmacy remains a difficulty for older patients. Therefore, exploring the use of combination pills and further efforts to reduce the burden of multiple medications among stroke survivors is warranted.

The questionnaire we have developed could be used to understand the challenges around medication faced by other patient groups. Unmet medication needs among UK stroke survivors have not been previously explored in the context of activities both survivors and caregivers consider important for taking medicines. Through understanding the extent of unmet needs as well as the areas in which these are greatest, strategies can be developed which address poor medication taking practices and therefore improve medication adherence.

### Future research

Novel interventions focussing on the practicalities of taking medicines and aimed at improving stroke survivors' adherence to treatment are needed. The findings reported here may inform the development of such interventions. Advances in technology have the potential to facilitate delivery of such interventions, e.g. electronic devices prompting medication taking times.<sup>56 57</sup> Efforts to improve medication taking among survivors of stroke using technology are already underway and have shown promise.<sup>58</sup>

## Acknowledgements

The authors wish to thank all the stroke survivors and caregivers who participated in this study.

## Competing interests

None declared

## Data sharing statement

No additional data are available

## Author/s contribution

ADS is the Chief Investigator, contributed to the study design, data analysis and commented on the manuscript. JJ contributed to the study design, data collection, data analysis and prepared the manuscript for submission. JM is a co-investigator on the study, wrote and commented on the manuscript. SS is a co-investigator on the study, wrote and commented on the manuscript. LA contributed to the data analysis and commented on the manuscript. GDIT contributed to the data analysis and commented on the manuscript. All authors agreed on the final draft of the submitted manuscript.

## References

1. Marek KD AL. Medication Management of the Community-Dwelling Older Adult. In: RG H, ed. An Evidence-Based Handbook for Nurses: Agency for Healthcare Research and Quality (US). Rockville, MD2008.
2. Lewis A. Non-compliance: A \$100 billion problem. . *The Remington Report* 1997;5:14-5.
3. office NA. Progress in improving stroke care. In: Office NA, ed. London: Department of Health, 2010.
4. Young J, Forster A. Review of stroke rehabilitation. *BMJ* 2007;334(7584):86-90. doi: 10.1136/bmj.39059.456794.68
5. Miller EL, Murray L, Richards L, et al. Comprehensive overview of nursing and interdisciplinary rehabilitation care of the stroke patient: a scientific statement from the American Heart Association. *Stroke* 2010 (Oct);41(10):2402-48. doi: 10.1161/STR.0b013e3181e7512b

- 1  
2  
3 6. Feigin VL, Barker-Collo S, Parag V, et al. Auckland Stroke Outcomes Study: Part 1: Gender, stroke types,  
4  
5 ethnicity, and functional outcomes 5 years poststroke. *Neurology* 2010;75(18):1597-607. doi:  
6  
7 10.1212/WNL.0b013e3181fb44b3
- 8  
9 7. Park JH, Park JH, Lee SY, et al. Disparities in Antihypertensive Medication Adherence in Persons With  
10  
11 Disabilities and Without Disabilities: Results of a Korean Population-Based Study. *Archives of*  
12  
13 *Physical Medicine and Rehabilitation* 2008;89(8):1460-67. doi:  
14  
15 <http://dx.doi.org/10.1016/j.apmr.2007.12.045>
- 16  
17 8. Stilley CS, Bender CM, Dunbar-Jacob J, et al. The Impact of Cognitive Function on Medication  
18  
19 Management: Three Studies. *Health psychology : official journal of the Division of Health*  
20  
21 *Psychology, American Psychological Association* 2010;29(1):50-55. doi: 10.1037/a0016940
- 22  
23 9. Smith D, Lovell J, Weller C, et al. A systematic review of medication non-adherence in persons with  
24  
25 dementia or cognitive impairment. *PLoS ONE* 2017;12(2):e0170651. doi:  
26  
27 10.1371/journal.pone.0170651
- 28  
29 10. Kronish IM, Ye S. Adherence to Cardiovascular Medications: Lessons Learned and Future Directions.  
30  
31 *Progress in cardiovascular diseases* 2013;55(6):590-600. doi: 10.1016/j.pcad.2013.02.001
- 32  
33 11. Gordon K, Smith F, Dhillon S. Effective chronic disease management: Patients' perspectives on  
34  
35 medication-related problems. *Patient Education and Counseling* 2007;65(3):407-15. doi:  
36  
37 <http://dx.doi.org/10.1016/j.pec.2006.09.012>
- 38  
39 12. Xu J, Zhao X, Wang Y, et al. Impact of a Better Persistence with Antihypertensive Agents on Ischemic  
40  
41 Stroke Outcomes for Secondary Prevention. *PLoS ONE* 2013;8(6):e65233. doi:  
42  
43 10.1371/journal.pone.0065233
- 44  
45 13. Colivicchi F, Bassi A, Santini M, et al. Discontinuation of Statin Therapy and Clinical Outcome After  
46  
47 Ischemic Stroke. *Stroke* 2007;38(10):2652-57. doi: 10.1161/strokeaha.107.487017
- 48  
49 14. Jamison J, Sutton S, Mant J, et al. Barriers and facilitators to adherence to secondary stroke prevention  
50  
51 medications after stroke: Analysis of survivors and caregivers views from an online stroke forum.  
52  
53 *BMJ Open* 2017;7 (e016814)

15. Jamison J, Graffy J, Mullis R, et al. Barriers to medication adherence for the secondary prevention of stroke: a qualitative interview study in primary care. *The British Journal of General Practice* 2016;66(649):e568-e76. doi: 10.3399/bjgp16X685609
16. Souter C, Kinnear A, Kinnear M, et al. Optimisation of secondary prevention of stroke: a qualitative study of stroke patients' beliefs, concerns and difficulties with their medicines. *International Journal of Pharmacy Practice* 2014;22(6):424-32. doi: 10.1111/ijpp.12104
17. De Simoni A, Mant J, Sutton S. Adherence to medication in stroke survivors dependent on caregivers. *British Journal of General Practice* 2015;65(640):e789.
18. De Simoni A, Hardeman W, Mant J, et al. Trials to Improve Blood Pressure Through Adherence to Antihypertensives in Stroke/TIA: Systematic Review and Meta-Analysis. *Journal of the American Heart Association* 2013 (Aug 20);2(4):e000251. doi: 10.1161/jaha.113.000251
19. Munger MA, Van Tassel BW, LaFleur J. Medication Nonadherence: An Unrecognized Cardiovascular Risk Factor. *Medscape General Medicine* 2007;9(3):58-58.
20. Brown MT, Bussell JK. Medication Adherence: WHO Cares? *Mayo Clinic proceedings* 2011;86(4):304-14. doi: 10.4065/mcp.2010.0575
21. Wolff JL, Spillman B. Older Adults Receiving Assistance With Physician Visits and Prescribed Medications and Their Family Caregivers: Prevalence, Characteristics, and Hours of Care. *The Journals of Gerontology: Series B* 2014;69(Suppl\_1):S65-S72. doi: 10.1093/geronb/gbu119
22. Ownby RL, Hertzog C, Crocco E, et al. Factors related to medication adherence in memory disorder clinic patients. *Aging & mental health* 2006;10(4):378-85. doi: 10.1080/13607860500410011
23. Andrew NE, Kilkenny M, Naylor R, et al. Understanding Long-Term Unmet Needs in Australian Survivors of Stroke. *International Journal of Stroke* 2014;9(SA100):106-12. doi: doi:10.1111/ijvs.12325
24. McKevitt C, Fudge N, Redfern J, et al. Self-Reported Long-Term Needs After Stroke. *Stroke* 2011;42(5):1398-403. doi: 10.1161/strokeaha.110.598839
25. De Simoni A KI, Sutton S, Farmer A, Blenkinsopp A, Kinmonth AL, Mant J. Developing a pharmacist intervention to improve adherence to hypertensive medications in TIA/stroke patients. SAPC Conference. Norwich, 2010.

- 1  
2  
3 26. Braun V, Clarke V. Using thematic analysis in psychology. *Qualitative Research in Psychology*  
4  
5 2006;3(2):77-101. doi: 10.1191/1478088706qp063oa  
6  
7 27. Gompertz P, Pound P, Ebrahim S. A postal version of the Barthel Index. *Clinical Rehabilitation*  
8  
9 1994;8(3):233-39. doi: doi:10.1177/026921559400800308  
10  
11 28. Quinn TJ, Langhorne P, Stott DJ. Barthel Index for Stroke Trials. *Development, Properties, and*  
12  
13 *Application* 2011;42(4):1146-51. doi: 10.1161/strokeaha.110.598540  
14  
15 29. Document Capture Company [Available from: [http://www.documentcapture.co.uk/data-collection-](http://www.documentcapture.co.uk/data-collection-methods/)  
16  
17 [methods/](http://www.documentcapture.co.uk/data-collection-methods/)  
18  
19 30. Tom Smith MN, Stefan Noble, Gemma Wright, David McLennan and Emma Plunkett. The English  
20  
21 Indices of Deprivation 2015 Research report, 2015.  
22  
23 31. Hayes TL, Larimer N, Adami A, et al. Medication Adherence in Healthy Elders. *Journal of Aging and*  
24  
25 *Health* 2009;21(4):567-80. doi: 10.1177/0898264309332836  
26  
27 32. Chowdhury R, Khan H, Heydon E, et al. Adherence to cardiovascular therapy: a meta-analysis of  
28  
29 prevalence and clinical consequences. *European Heart Journal* 2013;34:2940-8. doi:  
30  
31 10.1093/eurheartj/eh295  
32  
33 33. Truelove M, Patel A, Bompont S, et al. The Effect of a Cardiovascular Polypill Strategy on Pill Burden.  
34  
35 *Cardiovascular Therapeutics* 2015;33(6):347-52. doi: 10.1111/1755-5922.12151  
36  
37 34. Claxton AJ, Cramer, J., Pierce, C. A Systematic Review of the Associations Between Dose Regimens and  
38  
39 Medication Compliance *Clinical therapeutics* 2001;23(8):1296-310.  
40  
41 35. Bushnell CD, Olson DM, Zhao X, et al. Secondary preventive medication persistence and adherence 1 year  
42  
43 after stroke. *Neurology* 2011;77(12):1182-90. doi: 10.1212/WNL.0b013e31822f0423 [published  
44  
45 Online First: 2011/09/09]  
46  
47 36. Chapman RH, Benner JS, Petrilla AA, et al. Predictors of adherence with antihypertensive and lipid-  
48  
49 lowering therapy. *Archives of Internal Medicine* 2005;165(10):1147-52. doi:  
50  
51 10.1001/archinte.165.10.1147  
52  
53 37. Thom S, Poulter N, Field J, et al. Effects of a fixed-dose combination strategy on adherence and risk  
54  
55 factors in patients with or at high risk of CVD: the UMPIRE randomized clinical trial. *JAMA : the*  
56  
57 *journal of the American Medical Association* 2013;310(9):918-29. doi: 10.1001/jama.2013.277064  
58  
59

- 1  
2  
3 38. Noureldin M, Plake KS. Correlates of caregivers' involvement in the management of older adults'  
4 medications. *Research in Social and Administrative Pharmacy* 2017;13(4):840-48. doi:  
5 <https://doi.org/10.1016/j.sapharm.2016.09.009>  
6  
7  
8  
9 39. Andersson K, Melander A, Svensson C, et al. Repeat prescriptions: refill adherence in relation to patient  
10 and prescriber characteristics, reimbursement level and type of medication. *European Journal of*  
11 *Public Health* 2005;15(6):621-26. doi: 10.1093/eurpub/cki053  
12  
13  
14 40. Vlasnik JJ, Aliotta SL, DeLor B. Medication adherence: Factors influencing compliance with prescribed  
15 medication plans. *The Case Manager* 2005;16(2):47-51. doi:  
16 <http://dx.doi.org/10.1016/j.casemgr.2005.01.009>  
17  
18  
19 41. Bauler S, Jacquin-Courtois S, Haesebaert J, et al. Barriers and Facilitators for Medication Adherence in  
20 Stroke Patients: A Qualitative Study Conducted in French Neurological Rehabilitation Units.  
21 *European Neurology* 2014;72(5-6):262-70.  
22  
23  
24 42. Olaiya MT, Cadilhac DA, Kim J, et al. Long-term unmet needs and associated factors in stroke or TIA  
25 survivors: An observational study. *Neurology* 2017 (Jul 4);89(1):68-75. doi:  
26 10.1212/wnl.0000000000004063  
27  
28  
29 43. Conn VS, Ruppap TM, Chan KC, et al. Packaging interventions to increase medication adherence:  
30 systematic review and meta-analysis. *Current Medical Research and Opinion* 2015;31(1):145-60. doi:  
31 10.1185/03007995.2014.978939  
32  
33  
34 44. Hall J, Bond C, Kinnear M, et al. Views of patients and professionals about electronic multicompartiment  
35 medication devices: a qualitative study. *BMJ Open* 2016;6:e012915. doi: 10.1136/bmjopen-2016-  
36 012915  
37  
38  
39 45. Beckman AGK, Parker MG, Thorslund M. Can elderly people take their medicine? *Patient Education and*  
40 *Counseling* 2005;59(2):186-91. doi: <http://dx.doi.org/10.1016/j.pec.2004.11.005>  
41  
42  
43 46. Notenboom K, Beers E, van Riet-Nales DA, et al. Practical Problems with Medication Use that Older  
44 People Experience: A Qualitative Study. *Journal of the American Geriatrics Society*  
45 2014;62(12):2339-44. doi: 10.1111/jgs.13126  
46  
47  
48  
49  
50  
51  
52  
53  
54  
55  
56  
57  
58  
59  
60

- 1  
2  
3 47. O'Carroll R, Whittaker J, Hamilton B, et al. Predictors of adherence to secondary preventive medication in  
4 stroke patients. *Ann Behav Med* 2011;41(3):383-90. doi: 10.1007/s12160-010-9257-6 [published  
5 Online First: 2011/01/05]  
6  
7  
8  
9 48. Crowley MJ, Zullig LL, Shah BR, et al. Medication Non-Adherence After Myocardial Infarction: An  
10 Exploration of Modifying Factors. *Journal of General Internal Medicine* 2015;30(1):83-90. doi:  
11 10.1007/s11606-014-3072-x  
12  
13  
14 49. Hughes CM. Medication Non-Adherence in the Elderly. *Drugs & Aging* 2004;21(12):793-811. doi:  
15 10.2165/00002512-200421120-00004  
16  
17  
18 50. De Schryver EL, van Gijn J, Kappelle LJ, et al. Non-adherence to aspirin or oral anticoagulants in  
19 secondary prevention after ischaemic stroke. *J Neurol* 2005;252(11):1316-21. doi: 10.1007/s00415-  
20 005-0858-0 [published Online First: 2005/05/04]  
21  
22  
23 51. Kersten P, Low JTS, Ashburn A, et al. The unmet needs of young people who have had a stroke: results of  
24 a national UK survey. *Disability and Rehabilitation* 2002;24(16):860-66. doi:  
25 10.1080/09638280210142167  
26  
27  
28 52. Bailey JE, Wan JY, Tang J, et al. Antihypertensive medication adherence, ambulatory visits, and risk of  
29 stroke and death. *J Gen Intern Med* 2010;25(6):495-503. doi: 10.1007/s11606-009-1240-1 [published  
30 Online First: 2010/02/19]  
31  
32  
33 53. Amarenco P, Labreuche J. Lipid management in the prevention of stroke: review and updated meta-  
34 analysis of statins for stroke prevention. *The Lancet Neurology* 2009;8(5):453-63. doi: 10.1016/s1474-  
35 4422(09)70058-4 [published Online First: 2009/04/21]  
36  
37  
38 54. Ho PM, Rumsfeld JS, Masoudi FA, et al. Effect of medication nonadherence on hospitalization and  
39 mortality among patients with diabetes mellitus. *Arch Intern Med* 2006;166(17):1836-41. doi:  
40 10.1001/archinte.166.17.1836 [published Online First: 2006/09/27]  
41  
42  
43 55. Rasmussen JN, Chong A, Alter DA. Relationship between adherence to evidence-based pharmacotherapy  
44 and long-term mortality after acute myocardial infarction. *Jama* 2007;297(2):177-86. doi:  
45 10.1001/jama.297.2.177 [published Online First: 2007/01/11]  
46  
47  
48  
49  
50  
51  
52  
53  
54  
55  
56  
57  
58  
59  
60

- 1  
2  
3 56. Tao D, Xie L, Wang T, et al. A meta-analysis of the use of electronic reminders for patient adherence to  
4 medication in chronic disease care. *Journal of Telemedicine and Telecare* 2015;21(1):3-13. doi:  
5 doi:10.1177/1357633X14541041  
6  
7  
8  
9 57. Thakkar J, Kurup R, Laba T, et al. Mobile telephone text messaging for medication adherence in chronic  
10 disease: A meta-analysis. *JAMA Internal Medicine* 2016;176(3):340-49. doi:  
11 10.1001/jamainternmed.2015.7667  
12  
13  
14 58. Kamal AK, Shaikh Q, Pasha O, et al. A randomized controlled behavioral intervention trial to improve  
15 medication adherence in adult stroke patients with prescription tailored Short Messaging Service  
16 (SMS)-SMS4Stroke study. *BMC Neurology* 2015;15(1):212. doi: 10.1186/s12883-015-0471-5  
17  
18  
19  
20  
21  
22  
23  
24  
25  
26  
27  
28  
29  
30  
31  
32  
33  
34  
35  
36  
37  
38  
39  
40  
41  
42  
43  
44  
45  
46  
47  
48  
49  
50  
51  
52  
53  
54  
55  
56  
57  
58  
59  
60



|                                       |      | Age (years) | Female | Male  | Time since stroke (Years) | N of daily medicines | Independent for ADLs (BI=20) |
|---------------------------------------|------|-------------|--------|-------|---------------------------|----------------------|------------------------------|
| All patients                          | N    | 588         | 210    | 346   | 535                       | 557                  | 139                          |
|                                       | %    |             | 37.77  | 62.23 |                           |                      | 28.31                        |
|                                       | Mean | 72.69       |        |       | 7.65                      | 6.38                 |                              |
|                                       | SD   | 11.57       |        |       | 7.58                      | 4.00                 |                              |
| Patients who receive help of any kind | N    | 331         | 112    | 197   | 295                       | 312                  | 53                           |
|                                       | %    |             | 36.25  | 63.25 |                           |                      | 18.93                        |
|                                       | Mean | 73.57       |        |       | 7.97                      | 7.33                 |                              |
|                                       | SD   | 12.23       |        |       | 8.50                      | 4.45                 |                              |

Table 1. Characteristics of study participants (*mean scores reported unless otherwise stated*). N represent the number of participants who completed the survey in respect to the different variables.

|                                                                                                                  | N   | All the Time<br>N (%) | Often<br>N (%) | Sometimes<br>N (%) | Rarely<br>N (%) | Never<br>N (%) | Yes<br>N (%) | No<br>N (%)   |
|------------------------------------------------------------------------------------------------------------------|-----|-----------------------|----------------|--------------------|-----------------|----------------|--------------|---------------|
| Question 1<br>Is somebody helping with prescriptions and collection of your medicines?                           | 583 | 186<br>(31.9)         | 19<br>(3.3)    | 40<br>(6.9)        | 45<br>(7.7)     | 293<br>(50.2)  |              |               |
| Question 1a<br>Do you feel you need more help with prescriptions and collection of your medicines?               | 551 |                       |                |                    |                 |                | 33<br>(6.0)  | 518<br>(94.0) |
| Question 2<br>Is somebody helping you getting the medicines out of the box, bottle or blister pack?              | 578 | 85<br>(14.7)          | 15<br>(2.6)    | 31<br>(5.4)        | 30<br>(5.2)     | 417<br>(72.1)  |              |               |
| Question 2a<br>Do you feel you need more help with getting the medicines out of the box, bottle or blister pack? | 553 |                       |                |                    |                 |                | 33<br>(6.0)  | 520<br>(94.0) |
| Question 3<br>Is somebody helping with reminding you when is the time to take your medicine?                     | 577 | 78<br>(13.6)          | 22<br>(3.8)    | 59<br>(10.2)       | 51<br>(8.8)     | 367<br>(63.6)  |              |               |
| Question 3a<br>Do you feel you need more help with reminding when is the time to take your medicine?             |     |                       |                |                    |                 |                | 35<br>(6.2)  | 529<br>(93.8) |
| Question 4<br>Is somebody helping you with swallowing your medicine?                                             | 579 | 56<br>(9.7)           | 11<br>(1.9)    | 29<br>(5.0)        | 21<br>(3.6)     | 462<br>(79.8)  |              |               |
| Question 4a<br>Do you feel you need more help with swallowing your medicine?                                     |     |                       |                |                    |                 |                | 9<br>(1.6)   | 551<br>(98.4) |
| Question 5<br>Is somebody helping you with checking that you have taken your medicines?                          | 576 | 76<br>(13.2)          | 23<br>(4.0)    | 58<br>(10.0)       | 40<br>(6.9)     | 379<br>(65.9)  |              |               |
| Question 5 a<br>Do you feel you need more help with checking that you have taken your medicine?                  |     |                       |                |                    |                 |                | 20<br>(3.6)  | 538<br>(96.4) |
| Thinking of the last 30 days, how often did you miss taking your regular medicines?                              | 594 | 4<br>(0.7)            | 5<br>(0.8)     | 55<br>(9.3)        | 142<br>(23.9)   | 388<br>(65.3)  |              |               |

Table 2. Responses to the survey questions.

|                                                                           | <b>Univariable analysis</b>            | <b>Multivariable analysis</b>          |
|---------------------------------------------------------------------------|----------------------------------------|----------------------------------------|
| <b>Variable</b>                                                           | <b>Odds ratio (95% CI)<br/>p value</b> | <b>Odds ratio (95% CI)<br/>p value</b> |
| Age $\geq 70$                                                             | 0.63 (0.37-1.06) p=0.084               | 0.69 (0.40-1.19) p=0.180               |
| Gender (female)                                                           | 0.65 (0.36-1.15) p=0.137               | 0.65 (0.36-1.17) p=0.147               |
| Number of different medicines                                             | 1.20 (1.12-1.28) p<0.001               | 1.22 (1.14-1.31) p<0.001               |
| Dependence for ADLs                                                       | 4.10 (1.59-10.56) p=0.003              | 4.91 (1.86-12.97) p=0.001              |
| Years since stroke                                                        | 1.03 (1.00-1.06) p=0.078               | 1.02 (0.99-1.05) p=0.160               |
| Getting help with prescriptions and collection of medication              | 4.67 (2.48-8.79) p<0.001               | 4.55 (2.38-8.67) p<0.001               |
| Getting help with taking medicines out of the box, bottle or blister pack | 6.70 (3.81-11.77) p<0.001              | 6.53 (3.63-11.75) p<0.001              |
| Getting help with reminding you when is the time to take your medicine?   | 4.70 (2.68-8.21) p<0.001               | 4.25 (2.39-7.56) p<0.001               |
| Getting help to swallow the medication                                    | 6.72 (3.89-11.59) p<0.001              | 6.75 (3.79-12.02) p<0.001              |
| Getting help by checking that you have taken your medicines               | 4.89 (2.81-8.52) p<0.001               | 5.58 (3.08-10.09) p<0.001              |
| Getting any kind of help                                                  | 5.86 (2.84-12.08) p<0.001              | 5.58 (2.68-11.63) p<0.001              |

Table 3. Variables associated with unmet needs.

|                                                                           | <b>Univariable analysis</b>        | <b>Multivariable analysis</b>      |
|---------------------------------------------------------------------------|------------------------------------|------------------------------------|
| <b>Variable</b>                                                           | <b>Odds Ratio (95% CI) p value</b> | <b>Odds Ratio (95% CI) p value</b> |
| Age $\geq 70$                                                             | 0.59 (0.42-0.84) p=0.003           | 0.59 (0.41-0.86) p=0.006           |
| Gender (female)                                                           | 0.86 (0.59-1.23) p=0.401           | 0.88 (0.61-1.28) p=0.498           |
| Number of different medicines                                             | 1.04 (1.00-1.09) p=0.040           | 1.07 (1.02-1.12) p=0.008           |
| Dependence for ADLs (BI<20)                                               | 1.21 (0.80-1.84) p=0.362           | 1.30 (0.83-2.04) p=0.248           |
| Years since stroke                                                        | 1.00 (0.98-1.02) p=0.950           | 1.00 (0.98-1.02) p=0.971           |
| Getting help with prescriptions and collection of medication              | 2.04 (1.45-2.90) p<0.001           | 2.29 (1.58-3.32) p<0.001           |
| Getting help to have the medicines out of the box, bottle or blister pack | 1.39 (0.95-2.02) p=0.089           | 1.49 (1.00-2.21) p=0.051           |
| Getting help with reminding you when is the time to take your medicine?   | 2.48 (1.74-3.55) p<0.001           | 2.67 (1.83-3.90) p<0.001           |
| Getting help to swallow the medication                                    | 1.53 (1.01-2.32) p=0.045           | 1.68 (1.08-2.61) p=0.022           |
| Getting help by checking that you have taken your medicines               | 2.37 (1.66-3.39) p<0.001           | 2.50 (1.70-3.66) p<0.001           |
| Getting any kind of help                                                  | 2.06 (1.44-2.93) p<0.001           | 2.08 (1.43-3.03) p<0.001           |
| Unmet needs (participant reported more help needed)                       | 5.27 (3.02-9.22) p<0.000           | 5.09 (2.84-9.11) p<0.001           |

Table 4. Variables associated with missing medicines.

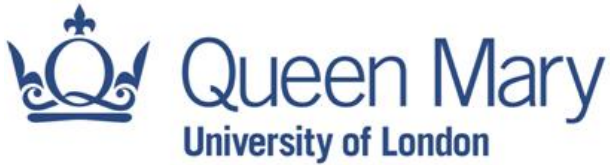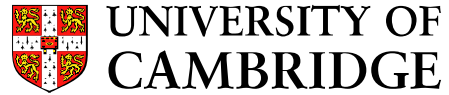

## QUESTIONNAIRE – PATIENT

Many people with stroke need help with taking their medicines. We would like to ask you few questions about the help you might need with taking your medicines.

How many different type of medicines do you take in one day?

*Write the number or an approximation. Please count all medications including eye drops, injections etc.*

How old are you?

How long ago was your stroke?  years

What is your sex?

 M

 F

For each question below, please tick the box that best describes how you have taken your medicines in the last month:

**1. Is somebody helping with prescriptions and collection of your medicines?**

all the time  
often  
sometimes  
rarely  
never

  
  
  
  


Do you feel you need more help with prescriptions and collection of your medicines?

Yes

No

**2. Is somebody helping you getting the medicines out of the box, bottle or blister pack?**

all the time  
often  
sometimes  
rarely  
never

  
  
  
  


Do you feel you need more help with getting the medicines out of the box, bottle or blister pack?

Yes

No

3. Is somebody helping with reminding you when is the time to take your medicine?

all the time  
often  
sometimes  
rarely  
never

Do you feel you need more help with reminding when is the time to take your medicine?

Yes  No

4. Is somebody helping you with swallowing your medicine? For example by giving you a drink

all the time  
often  
sometimes  
rarely  
never

Do you feel you need more help with swallowing your medicine?

Yes  No

5. Is somebody helping you with checking that you have taken your medicines?

all the time  
often  
sometimes  
rarely  
never

Do you feel you need more help with checking that you have taken your medicine?

Yes  No

**Missing medicines**

Thinking of the last 30 days, how often did you miss taking your regular medicines?

all the time  
often  
sometimes  
rarely  
never

Remember - tick one box only

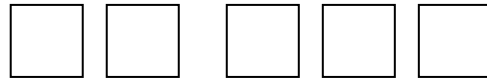

## Barthel Questionnaire

These are some questions about your ability to look after yourself.

They may not seem to apply to you.

Please answer them all.

Tick one box in each section.

### Bathing

In the bath or shower do you:

manage on your own?

need help getting in and out?

*Remember - tick one box only*

need other help?

never have a bath or shower?

need to be washed in bed?

|  |
|--|
|  |
|  |
|  |
|  |
|  |

### Stairs

Do you climb stairs at home:

without any help?

with someone carrying your frame?

*Remember - tick one box only*

with someone encouraging you?

with physical help?

not at all?

don't have stairs?

|  |
|--|
|  |
|  |
|  |
|  |
|  |
|  |

### Dressing

Do you get dressed:

without any help?

just with help with buttons?

*Remember - tick one box only*

with someone helping you most of the time?

|  |
|--|
|  |
|  |
|  |

### Mobility

Do you walk indoors:

without any help apart from a frame?

with one person watching over you?

*Remember - tick one box only*

with one person helping you?

with more than one person helping?

not at all?

Or do you use a wheelchair independently?  
(e.g. round corners)

|  |
|--|
|  |
|  |
|  |
|  |
|  |
|  |

### Transfer

Do you move from bed to chair:

on your own?

with a little help from one person?

*Remember - tick one box only*

with a lot of help from one or more people?

not at all?

|  |
|--|
|  |
|  |
|  |
|  |

|                          |                          |                          |                          |                          |
|--------------------------|--------------------------|--------------------------|--------------------------|--------------------------|
| <input type="checkbox"/> | <input type="checkbox"/> | <input type="checkbox"/> | <input type="checkbox"/> | <input type="checkbox"/> |
|--------------------------|--------------------------|--------------------------|--------------------------|--------------------------|

**Feeding**

|                                     |                                             |                          |
|-------------------------------------|---------------------------------------------|--------------------------|
| Do you eat food:                    | without any help?                           | <input type="checkbox"/> |
|                                     | with help cutting food or spreading butter? | <input type="checkbox"/> |
| <i>Remember - tick one box only</i> | with more help?                             | <input type="checkbox"/> |

**Toilet use**

|                                     |                                      |                          |
|-------------------------------------|--------------------------------------|--------------------------|
| Do you use a toilet or commode:     | without any help?                    | <input type="checkbox"/> |
|                                     | with some help but can do something? | <input type="checkbox"/> |
| <i>Remember - tick one box only</i> | with quite a lot of help?            | <input type="checkbox"/> |

**Grooming**

|                                     |               |                          |
|-------------------------------------|---------------|--------------------------|
| Do you brush your hair and teeth    | without help? | <input type="checkbox"/> |
| Wash your face and shave:           | with help?    | <input type="checkbox"/> |
| <i>Remember - tick one box only</i> |               |                          |

**Bladder**

|                                     |                                           |                          |
|-------------------------------------|-------------------------------------------|--------------------------|
| Are you incontinent of urine?       | never                                     | <input type="checkbox"/> |
|                                     | less than once a week                     | <input type="checkbox"/> |
| <i>Remember - tick one box only</i> | less than once a day                      | <input type="checkbox"/> |
|                                     | more often                                | <input type="checkbox"/> |
|                                     | Or do you have a catheter managed for you | <input type="checkbox"/> |

**Bowels**

|                                     |                                              |                          |
|-------------------------------------|----------------------------------------------|--------------------------|
| Do you soil yourself?               | never                                        | <input type="checkbox"/> |
|                                     | Occasional accident                          | <input type="checkbox"/> |
| <i>Remember - tick one box only</i> | all the time                                 | <input type="checkbox"/> |
|                                     | or do you need someone to give you an enema? | <input type="checkbox"/> |



.

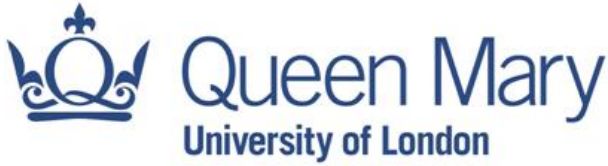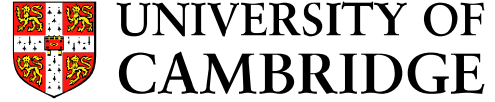

## Help with taking tablets after stroke

### FAMILY MEMBER/FRIEND OR PRIVATE CARER COPY

Many people with stroke need help with taking their medicines. We would like to ask you few questions about the help you might be offering to your family member/friend/ patient with stroke with taking medicines.

#### Relation with your family member/friend with stroke

Are you:

- partner
- son or daughter
- friend
- carer from an agency
- other
- if other, please specify

*Remember - tick one box only*

How many different types of medicines does your family member/friend/patient with stroke take in one day?  
*Write the number or an approximation. Please count all medications including eye drops, injections etc.*

How old is your family member/friend/patient with stroke? (years)

How many years ago was your family member/friend/patient's stroke?

What is your family member/friend/patient with stroke sex?

M  F

For each question below, please tick the box that best describes the help needed by your family member/friend/patient with stroke with taking medicines in the last month.

**1. Is somebody helping your family member/friend/patient with stroke with prescriptions and collection of his/her medicines?**

- all the time
- often
- sometimes
- rarely
- never

Do you feel your family member/friend/patient with stroke needs more help with prescriptions and collection of his/her medicines?

Yes

No

.

2. Is somebody helping your family member/friend/patient with stroke getting the medicines out of the box, bottle or blister pack?

all the time  
often  
sometimes  
rarely  
never

|  |
|--|
|  |
|  |
|  |
|  |
|  |

Do you feel your family member/friend/patient with stroke needs more help with getting the medicines out of the box, bottle, or blister pack?

Yes  No

3. Is somebody helping your family member/friend/patient with stroke with reminding when is time to take his/her medicine?

all the time  
often  
sometimes  
rarely  
never

|  |
|--|
|  |
|  |
|  |
|  |
|  |

Do you feel your family member/friend/patient with stroke needs more help with reminding when is time to take his/her medicine?

Yes  No

4. Is somebody helping your family member/friend/patient with stroke with swallowing his/her medicine? For example by giving a drink.

all the time  
often  
sometimes  
rarely  
never

|  |
|--|
|  |
|  |
|  |
|  |
|  |

Do you feel you your family member/friend/patient with stroke need more help with swallowing his/her medicine?

Yes  No

5. Is somebody helping your family member/friend/patient with stroke with checking that he/she has taken his/her medicines?

all the time  
often  
sometimes  
rarely  
never

|  |
|--|
|  |
|  |
|  |
|  |
|  |

Do you feel your family member/friend/patient with stroke needs more help with checking that he/she has taken his/her medicine?

Yes  No

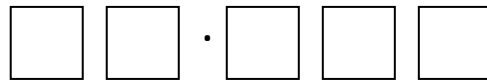

**Missing medicines**

Thinking of the last 30 days, how often did your family member/friend/patient with stroke miss taking his/her regular medicines?

- all the time
- often
- sometimes
- rarely
- never

|  |
|--|
|  |
|  |
|  |
|  |
|  |

*Remember - tick one box only*

**Barthel Questionnaire**

These are some questions about the ability of your family member/friend/patient with stroke to look after him/herself.

Please answer them all.

Please fill this questionnaire even if you are not regularly caring for your family member/friend/patient with stroke, trying to answer questions in the way you think most accurately describes the disability of your family member/friend/patient with stroke.

Tick one box in each section.

**Bathing**

In the bath or shower do you:

- manage on your own?
- need help getting in and out?
- need other help?
- never have a bath or shower?
- need to be washed in bed?

*Remember - tick one box only*

|  |
|--|
|  |
|  |
|  |
|  |
|  |

**Stairs**

Do you climb stairs at home:

- without any help?
- with someone carrying your frame?
- with someone encouraging you?
- with physical help?
- not at all?
- don't have stairs?

*Remember - tick one box only*

|  |
|--|
|  |
|  |
|  |
|  |
|  |
|  |

**Dressing**

Do you get dressed:

- without any help?
- just with help with buttons?
- with someone helping you most of the time?

*Remember - tick one box only*

|  |
|--|
|  |
|  |
|  |

**Mobility**

Do you walk indoors:

- without any help apart from a frame?
- with one person watching over you?
- with one person helping you?

*Remember - tick one box only*

|  |
|--|
|  |
|  |
|  |

.

with more than one person helping?  
not at all?  
Or do you use a wheelchair independently?  
(e.g. round corners)

**Transfer**

Do you move from bed to chair:  
*Remember - tick one box only*

on your own?  
with a little help from one person?  
with a lot of help from one or more people?  
not at all?

**Feeding**

Do you eat food:  
*Remember - tick one box only*

without any help?  
with help cutting food or spreading butter?  
with more help?

**Toilet use**

Do you use a toilet or commode:  
*Remember - tick one box only*

without any help?  
with some help but can do something?  
with quite a lot of help?

**Grooming**

Do you brush your hair and teeth  
Wash your face and shave:  
*Remember - tick one box only*

without help?  
with help?

**Bladder**

Are you incontinent of urine?  
*Remember - tick one box only*

never  
less than once a week  
less than once a day  
more often  
Or do you have a catheter managed for you

**Bowels**

Do you soil yourself?  
*Remember - tick one box only*

never  
Occasional accident  
all the time  
or do you need someone to give you an enema?

**STROBE 2007 (v4) Statement—Checklist of items that should be included in reports of *cross-sectional studies***

| Section/Topic                | Item # | Recommendation                                                                                                                                                                       | Reported on page # |
|------------------------------|--------|--------------------------------------------------------------------------------------------------------------------------------------------------------------------------------------|--------------------|
| Title and abstract           | 1      | (a) Indicate the study’s design with a commonly used term in the title or the abstract                                                                                               | 2                  |
|                              |        | (b) Provide in the abstract an informative and balanced summary of what was done and what was found                                                                                  | 2                  |
| <b>Introduction</b>          |        |                                                                                                                                                                                      |                    |
| Background/rationale         | 2      | Explain the scientific background and rationale for the investigation being reported                                                                                                 | 4-5                |
| Objectives                   | 3      | State specific objectives, including any prespecified hypotheses                                                                                                                     | 5                  |
| <b>Methods</b>               |        |                                                                                                                                                                                      |                    |
| Study design                 | 4      | Present key elements of study design early in the paper                                                                                                                              | 6                  |
| Setting                      | 5      | Describe the setting, locations, and relevant dates, including periods of recruitment, exposure, follow-up, and data collection                                                      | 6                  |
| Participants                 | 6      | (a) Give the eligibility criteria, and the sources and methods of selection of participants                                                                                          | 7-8                |
| Variables                    | 7      | Clearly define all outcomes, exposures, predictors, potential confounders, and effect modifiers. Give diagnostic criteria, if applicable                                             | 8                  |
| Data sources/<br>measurement | 8*     | For each variable of interest, give sources of data and details of methods of assessment (measurement). Describe comparability of assessment methods if there is more than one group | 6-7                |
| Bias                         | 9      | Describe any efforts to address potential sources of bias                                                                                                                            | -                  |
| Study size                   | 10     | Explain how the study size was arrived at                                                                                                                                            | 10                 |
| Quantitative variables       | 11     | Explain how quantitative variables were handled in the analyses. If applicable, describe which groupings were chosen and why                                                         | 8-9                |
| Statistical methods          | 12     | (a) Describe all statistical methods, including those used to control for confounding                                                                                                | 8-9                |
|                              |        | (b) Describe any methods used to examine subgroups and interactions                                                                                                                  | 8-9                |
|                              |        | (c) Explain how missing data were addressed                                                                                                                                          | -                  |
|                              |        | (d) If applicable, describe analytical methods taking account of sampling strategy                                                                                                   | -                  |
|                              |        | (e) Describe any sensitivity analyses                                                                                                                                                | -                  |

|                          |     |                                                                                                                                                                                                              |       |
|--------------------------|-----|--------------------------------------------------------------------------------------------------------------------------------------------------------------------------------------------------------------|-------|
| <b>Results</b>           |     |                                                                                                                                                                                                              |       |
| Participants             | 13* | (a) Report numbers of individuals at each stage of study—eg numbers potentially eligible, examined for eligibility, confirmed eligible, included in the study, completing follow-up, and analysed            | 10    |
|                          |     | (b) Give reasons for non-participation at each stage                                                                                                                                                         | -     |
|                          |     | (c) Consider use of a flow diagram                                                                                                                                                                           | -     |
| Descriptive data         | 14* | (a) Give characteristics of study participants (eg demographic, clinical, social) and information on exposures and potential confounders                                                                     | 10-11 |
|                          |     | (b) Indicate number of participants with missing data for each variable of interest                                                                                                                          | -     |
| Outcome data             | 15* | Report numbers of outcome events or summary measures                                                                                                                                                         |       |
| Main results             | 16  | (a) Give unadjusted estimates and, if applicable, confounder-adjusted estimates and their precision (eg, 95% confidence interval). Make clear which confounders were adjusted for and why they were included | 11-12 |
|                          |     | (b) Report category boundaries when continuous variables were categorized                                                                                                                                    | -     |
|                          |     | (c) If relevant, consider translating estimates of relative risk into absolute risk for a meaningful time period                                                                                             | -     |
| Other analyses           | 17  | Report other analyses done—eg analyses of subgroups and interactions, and sensitivity analyses                                                                                                               | -     |
| <b>Discussion</b>        |     |                                                                                                                                                                                                              |       |
| Key results              | 18  | Summarise key results with reference to study objectives                                                                                                                                                     | 13    |
| Limitations              | 19  | Discuss limitations of the study, taking into account sources of potential bias or imprecision. Discuss both direction and magnitude of any potential bias                                                   | 13-14 |
| Interpretation           | 20  | Give a cautious overall interpretation of results considering objectives, limitations, multiplicity of analyses, results from similar studies, and other relevant evidence                                   | 14-16 |
| Generalisability         | 21  | Discuss the generalisability (external validity) of the study results                                                                                                                                        | 17    |
| <b>Other information</b> |     |                                                                                                                                                                                                              |       |
| Funding                  | 22  | Give the source of funding and the role of the funders for the present study and, if applicable, for the original study on which the present article is based                                                | 3     |

\*Give information separately for cases and controls in case-control studies and, if applicable, for exposed and unexposed groups in cohort and cross-sectional studies.

**Note:** An Explanation and Elaboration article discusses each checklist item and gives methodological background and published examples of transparent reporting. The STROBE checklist is best used in conjunction with this article (freely available on the Web sites of PLoS Medicine at <http://www.plosmedicine.org/>, Annals of Internal Medicine at <http://www.annals.org/>, and Epidemiology at <http://www.epidem.com/>). Information on the STROBE Initiative is available at [www.strobe-statement.org](http://www.strobe-statement.org).

# BMJ Open

## Evaluating practical support stroke survivors get with medicines and unmet needs in primary care: A survey

|                                 |                                                                                                                                                                                                                                                                                                                                                                                                                                                                   |
|---------------------------------|-------------------------------------------------------------------------------------------------------------------------------------------------------------------------------------------------------------------------------------------------------------------------------------------------------------------------------------------------------------------------------------------------------------------------------------------------------------------|
| Journal:                        | <i>BMJ Open</i>                                                                                                                                                                                                                                                                                                                                                                                                                                                   |
| Manuscript ID                   | bmjopen-2017-019874.R1                                                                                                                                                                                                                                                                                                                                                                                                                                            |
| Article Type:                   | Research                                                                                                                                                                                                                                                                                                                                                                                                                                                          |
| Date Submitted by the Author:   | 08-Dec-2017                                                                                                                                                                                                                                                                                                                                                                                                                                                       |
| Complete List of Authors:       | JAMISON, JAMES; UNIVERSITY OF CAMBRIDGE, PUBLIC HEALTH & PRIMARY CARE<br>Ayerbe, Luis; Queen Mary University of London, Centre for Primary Care and Public Health<br>Di Tanna, Gian Luca; Queen Mary University of London<br>Sutton, Stephen; University of Cambridge,<br>Mant, Jonathan; University of Cambridge, General Practice and Primary Care Research Unit<br>De Simoni, Anna; Queen Mary University of London, Centre for Primary Care and Public Health |
| <b>Primary Subject Heading</b>: | Cardiovascular medicine                                                                                                                                                                                                                                                                                                                                                                                                                                           |
| Secondary Subject Heading:      | Cardiovascular medicine, Public health, General practice / Family practice                                                                                                                                                                                                                                                                                                                                                                                        |
| Keywords:                       | Medication adherence, Caregivers, Barthel, STROKE MEDICINE                                                                                                                                                                                                                                                                                                                                                                                                        |
|                                 |                                                                                                                                                                                                                                                                                                                                                                                                                                                                   |

SCHOLARONE™  
Manuscripts

only

**Evaluating practical support stroke survivors get with medicines and unmet needs in primary care: A survey**

\*James Jamison<sup>1</sup>, MSc

Luis Ayerbe<sup>2</sup>, PhD

Gian Luca Di Tanna<sup>2</sup> PhD

Stephen Sutton<sup>1</sup>, PhD

Jonathan Mant<sup>1</sup>, MD

Anna De Simoni<sup>2</sup>, PhD

<sup>1</sup>Primary Care Unit, Department of Public Health & Primary Care, Forvie Site, University of Cambridge School of Clinical Medicine, Box 113 Cambridge Biomedical Campus, Cambridge, CB2 0SR.

<sup>2</sup>Centre for Primary Care and Public Health, Barts and The London School of Medicine and Dentistry, Yvonne Carter Building, London E1 2AB.

\*corresponding author: James Jamison; Tel: +44 (0)1223 768272. Fax: +44 (0)1223 763492. Email: [jj285@medschl.cam.ac.uk](mailto:jj285@medschl.cam.ac.uk)



## Abstract

### 1 2 3 4 5 6 7 8 9 10 11 12 13 14 15 16 17 18 19 20 21 22 23 24 25 26 27 28 29 30 31 32 33 34 35 36 37 38 39 40 41 42 43 44 45 46 47 48 49 50 51 52 53 54 55 56 57 58 59 60

### 1 2

### Objectives

To design a questionnaire and use it to explore unmet needs with practical aspects of medicines taking after stroke, predictors of medicine taking and to estimate the proportion of survivors who get support with daily medication taking.

### 6 7

### Design

Four workshops with stroke survivors and caregivers to design the questionnaire.

A cross-sectional postal questionnaire in primary care.

### 9 10

### Setting

18 GP practices in the East of England and London. Questionnaires posted between September 2016 and February 2017.

### 12 13

### Participants

1687 stroke survivors living in the community outside institutional long term care.

### 14 15

### Primary Outcome measures

The proportion of community stroke survivors receiving support from caregivers for practical aspects of medicine taking; the proportion with unmet needs in this respect; the predictors of experiencing unmet needs and missing taking medications.

### 18 19

### Results

A 5-item questionnaire was developed to cover the different aspects of medicine taking. 596/1687 (35%) questionnaires were returned. 56% reported getting help in at least one aspect of taking medication and 11% needing more help. 33% reported missing taking their medicines. Unmet needs were associated with receiving help with medications (OR: 5.6,  $p<0.001$ ), being on a higher number of medications (OR: 1.2,  $p<0.001$ ) and being dependent for activities of daily living (ADLs) (OR: 4.9,  $p=0.001$ ). Missing medication was associated with having unmet needs (OR: 5.1,  $p<0.001$ ), receiving help with medications (OR: 2.1,  $p<0.001$ ), being on a higher number of medicines (OR: 1.1,  $p=0.008$ ) and being older than 70 years (OR: 0.6,  $p=0.006$ ).

## 1 **Conclusions**

2 More than half of patients who replied needed help with taking medication, and 1 in 10 had unmet needs in  
3 this regard. Stroke survivors dependent on others have more unmet needs, more likely to miss medicines and  
4 might benefit from focused clinical and research attention. Novel primary care interventions focusing on the  
5 practicalities of taking medicines are warranted.

6 Abstract word count- 298

7  
8 Keywords: Stroke, Medication Adherence, Caregivers, Barthel

### 9 10 Article summary

#### 11 Strengths and Limitations

- 12 • Development of the questionnaire was based on patients' and caregivers' own views gathered through  
13 workshops.
- 14 • Stroke survivors were recruited from two UK regions.
- 15 • This work identified issues from a population that includes patients severely affected by stroke, who  
16 are often excluded from research.
- 17 • Results shed light on the effect of stroke related impairments on practical domains and predictors of  
18 medicine taking, which have significant effects on medication adherence and call for new primary care  
19 interventions.
- 20 • The low response rate reported is a limitation of this study and stroke survivors who are harder to  
21 reach may have been missed.

22  
23 Funding: This study was funded by the RCGP SFB, Ref. SFB 2014 – 15 'Quantifying the support stroke  
24 survivors get with daily medication taking: a questionnaire survey'. Anna De Simoni and Luis Ayerbe are  
25 funded by a NIHR Academic Clinical Lectureships. This article therefore presents independent research  
26 funded by NIHR. The views expressed are those of the authors and not necessarily those of the NHS, the  
27 NIHR, or the Department of Health. James Jamison was supported by a research grant from The Stroke  
28 Association and the British Heart Foundation: TSA BHF 2011/01

1

2  
3  
4  
5 2 Data sharing statement: No additional data available.

6

7

## 8 Introduction

9

10  
11  
12  
13 6 Stroke is the leading cause of disability in developed countries, with an estimated that 25-74% of the  
14  
15 7 50 million stroke survivors worldwide requiring some assistance or being fully dependent on caregivers for  
16  
17 8 activities of daily living (ADLs).<sup>1-3</sup> For many older adults remaining independent at home may depend on how  
18  
19 9 well they can manage complex medication regimens.<sup>4,5</sup> Around half of stroke survivors are dependent on  
20  
21 10 others for everyday activities.<sup>6</sup>

22  
23 11 There is evidence that being dependent for ADLs and impairment in mobility and communication  
24  
25 12 decrease medication adherence in patients suffering from hypertension.<sup>7</sup> Deficits in attention, cognition or  
26  
27 13 working memory have been linked with non-adherence to medications in other patient groups.<sup>8</sup> In a recent  
28  
29 14 systematic review of medication adherence among patients with cognitive impairment, one third of studies  
30  
31 15 showed that such patients were likely to have a caregiver to assist with medications and there was an  
32  
33 16 association between taking four or more medicines and nonadherence.<sup>9</sup> In patients taking cardiovascular  
34  
35 17 medicines, multiple factors including cognitive problems, lack of social support, dosing regimen, as well as  
36  
37 18 practical problems and difficulties accessing services, contribute to poor medication adherence.<sup>10,11</sup> Low  
38  
39 19 adherence to secondary prevention medication is associated with poor cardiovascular health.<sup>12,13</sup>

40  
41 20 Stroke survivors have previously reported difficulties in the handling of medication as a barrier to  
42  
43 21 adherence to secondary prevention medication after stroke.<sup>14</sup> This was true irrespective of age at stroke, with  
44  
45 22 younger and older stroke survivors being similarly affected.<sup>14</sup> Research on medication adherence in stroke has  
46  
47 23 identified multiple barriers to medication taking among stroke survivors.<sup>14-16</sup> However interventions developed  
48  
49 24 to improve adherence have mainly concentrated on patients responsible for their own medicine taking.<sup>17,18</sup>

50  
51 25 In England, the average age at stroke is 74 for men and 80 years for women.<sup>19</sup> In elderly patients in  
52  
53 26 particular, cognitive deficits, taking large number of medicines and the complexity of medication regimens  
54  
55 27 have been identified as barriers to medication adherence.<sup>20,21</sup> Caregivers are known to play a key role in

1  
2  
3 1 providing assistance to older people in a range of daily activities including medication taking and physician  
4 visits,<sup>22</sup> and can help improve adherence in cardiac patients with memory problems.<sup>23</sup>

5  
6  
7 3  
8  
9 4  
10  
11 5 Survivors of stroke have previously reported unmet needs including physical difficulties, cognitive  
12 and emotional difficulties, information needs and other unmet needs.<sup>24 25</sup> However we know little about factors  
13 that influence medication taking among stroke survivors with disabilities (i.e. physical or cognitive) living in  
14 the community (i.e. not in nursing homes), their unmet needs around the use of medicines or the proportion  
15 relying on caregivers for some or all aspects of medicine taking.

16  
17  
18  
19  
20  
21 10 To date, survey instruments examining the unmet needs of stroke survivors have not focused on practical  
22 aspects of medication taking such as how patients collect or handle their medicines.

23  
24  
25 12 The aims of this investigation were to design an instrument to evaluate the support stroke survivors get  
26 with taking their medicines, characterise patients receiving help with medications, estimate the proportion who  
27 have unmet needs with daily medicine taking and who miss medications. We additionally aimed to identify the  
28 predictors of missing medicines and of experiencing unmet needs with medications.

29  
30  
31 15 This knowledge can inform the development of primary care interventions aimed at improving medication  
32 taking in this patients' group.

## 33 34 35 36 18 Methods

### 37 38 39 40 41 20 **Questionnaire development workshops**

42  
43 21 To develop the questionnaire, current literature evidence was evaluated<sup>17</sup> and three workshops were  
44 conducted with 26 stroke survivors and 12 caregivers in the East of England (St John's College, Cambridge  
45 2009<sup>26</sup>: 7 patients, 1 caregiver; Different Strokes, Cambridge 2012: 9 patients, 3 caregivers; Peterborough,  
46 2012: 10 patients, 8 caregivers). Recruitment was opportunistic and no purposive sampling was applied. The  
47 workshops were organised in the context of gathering Patient and Public Involvement (PPI) input into research  
48 grant applications aimed at improving adherence to medication after stroke.<sup>17</sup>

49  
50  
51  
52  
53 26 The survey questions were developed through thematic analysis<sup>27</sup> of workshops field notes.

1  
2  
3 1 A fourth workshop was conducted to gather feedback on the questionnaire using a PPI (Patient and  
4  
5 2 Public Involvement) exercise with 11 stroke survivors and 3 caregivers recruited through a local stroke group  
6  
7 3 (Different Strokes, East of England). Two stroke survivors from this group took part in subsequent 'think-  
8  
9 4 aloud' interviews, which involved talking out loud as they read the questionnaire, continually verbalising what  
10  
11 5 they were thinking.

### 12 6 **Postal survey**

13  
14 7 In respect to sample size, 400 returned questionnaires would allow good precision for prevalence estimates.

15  
16 8 The 95% confidence intervals on various proportions with this sample size were calculated using the Wilson  
17  
18 9 score method (with continuity correction) and are as follows: 50% (45.00-55.00%), 25% (20.89%-29.60%),  
19  
20 10 5% (3.16-7.74%). With 600 questionnaires, the improvement in the precision of the estimates would be as  
21  
22 11 follows: 45.93%-54.07%, 21.62-28.70% and 3.46%-7.14% respectively.

23  
24 12 General practices in primary care in the East of England and London were approached through the Clinical  
25  
26 13 Research Network (CRN). CRN Eastern contacted 20 GP practices, of which 11 replied and took part in the  
27  
28 14 study. CRN North London contacted 140 GP East London practices by email (Tower Hamlets, Newham and  
29  
30 15 City & Hackney CCGs), of which only two replied and participated in the study. Five of the eight GP practices  
31  
32 16 contacted in North London (Barnet CCG) through a research coordinator took part in the study.

33  
34 17 Patients with stroke and their caregivers were sent the postal questionnaire according to the following criteria  
35  
36 18

### 37 38 19 Inclusion Criteria

39  
40 20 Patients:

41  
42 21 All patients aged > 18 on the practice stroke register with documented history of stroke.

43  
44  
45 22 Caregivers:

- 46  
47 23 • Anyone identified by the patient as having a role helping with medicine taking.

### 48 49 24 Exclusion Criteria

- 50  
51 25 • Patients who suffered a Transient ischaemic attack (TIA) but not a stroke.
- 52  
53 26 • Palliative or end of life patients.

1  
2  
3  
4  
5  
6  
7  
8  
9  
10  
11  
12  
13  
14  
15  
16  
17  
18  
19  
20  
21  
22  
23  
24  
25  
26  
27  
28  
29  
30  
31  
32  
33  
34  
35  
36  
37  
38  
39  
40  
41  
42  
43  
44  
45  
46  
47  
48  
49  
50  
51  
52  
53  
54  
55  
56  
57  
58  
59  
60

- 1 • Patients receiving institutional long term care (receiving total care in residential homes or living in
- 2 nursing homes).
- 3 • Patients considered unsuitable to taking part in the study by their GP.

### 5 **Survey participant identification**

6 A list of prospective patients was compiled from the stroke register of each surgery by the practice  
7 staff. No restriction was placed on the recruitment of survivors who were dependent for ADLs or lacking  
8 capacity. The list was screened by a practice GP and anyone not meeting the inclusion criteria or who was  
9 considered unsuitable for the study was excluded.

### 11 **Survey participant recruitment**

12 Eligible participants were sent a study survey pack by practice staff between September 2016 and  
13 February 2017. Study recruitment packs included two invitation letters, information sheets, questionnaires and  
14 postal version of Barthel Index<sup>28</sup>, one of which was for completion by the patient and the other by the  
15 caregiver. The Barthel Index provides a measure of functional independence and physical functioning and has  
16 been used in stroke research previously.<sup>29</sup> Patients with Barthel score 20 were categorised as independent for  
17 ADLs, those with score 15-19 moderately dependent for ADLs, and those with scores 0-14 severely  
18 dependent.<sup>30</sup> If receiving help with medications, the patient was asked to pass to their caregiver the invitation  
19 letter and information sheet and invite him/her to complete their copy of the questionnaire, providing answers  
20 on the patient's medicine taking. Family members, friends or paid caregivers of stroke survivors who were  
21 severely disabled and/or lacked mental capacity were invited to fill and return the caregivers' questionnaires  
22 only on behalf of patients. The information sheets stated that consent was implied by returning the completed  
23 questionnaire. Participants were asked to return completed questionnaires to the research centre in the  
24 FREEPOST envelopes provided. A second mail out of the study invitation pack was sent to all patients as a  
25 reminder, 2 weeks after the first one.

## 1 Ethical approval

2 This study has received ethical approval from Cambridge Central Research Ethics Committee (REC reference:  
3 16/EE/0182) and from the Health Research Authority (IRAS project ID: 170931)

## 5 Survey Analysis

6 Survey data entry was performed by Document Capture Company.<sup>31</sup> Individual patients' characteristics (age,  
7 gender, time since stroke, number of daily medicines) were collected from the questionnaires themselves.

8 Practice population, number of patients on stroke registers, deprivation score and ethnicity were taken from the  
9 National General Practice profiles (<https://fingertips.phe.org.uk/profile/general-practice>). The proportions of  
10 patients in each sociodemographic category, needing help taking medication, missing any medication in the  
11 previous 30 days, and reporting the need for more help taking medication, were estimated. When the survivor  
12 and caregiver questionnaires were both returned together, study data were collected from the patient's  
13 questionnaire only. The associations between 'Unmet needs' and age (< or ≥70 years), gender, total number  
14 of medicines taken, dependence for ADLs, years since stroke, and receiving help with medicines were  
15 investigated with individual logistic regression models (a different model per variable investigated), adjusted  
16 each and all of them for age and gender. Individual logistic regression models adjusted for age and gender  
17 were also used to estimate the association between 'Missed medicines in the previous 30 days' and age (< or >  
18 70 years), gender, total number of medicines taken, dependent for ADLs, years since stroke, help with  
19 medicines and unmet needs (a different model adjusted for age and gender per variable investigated).

20 Sensitivity analysis was conducted to investigate if predictors of missing medication or unmet needs vary  
21 when the analysis was done on the whole dataset *versus* on questionnaires filled by patients only.

22 Chi squared tests were used to compare the responses on unmet needs and missing medication given by  
23 patients *versus* caregivers.

24 All statistical analysis has been conducted with Stata (version 14, StataCorp LP, College Station, TX, USA,  
25 2013).

## Results

### 2 Questionnaire development

3 Taking medications emerged as an important issue in all three workshops: nearly half of patients  
4 stated that a family member or friend was supporting them with daily medicine routines especially in relation  
5 to prompting medicine taking. This was put down to effects of the stroke itself on memory retention rather  
6 than general memory problems that people without stroke also experience. They admitted missing doses due to  
7 forgetting. Only a small proportion of survivors were actually handling their own prescriptions and were  
8 relying on support from family and/or community services. In one workshop almost all survivors had Dosette  
9 medication boxes and agreed that taking medications out of safety bottles and blister packs was a problem due  
10 to physical disabilities.

11 Thematic analysis of workshop data revealed five main practical domains of support needed with  
12 medication taking: 1) Dealing with prescriptions and collection of medicines; 2) Getting medicines out of the  
13 box, blister packs or bottles; 3) Prompting 'It's time to take your medicine'; 4) Swallowing medicines; and 5)  
14 Checking whether medicines have been taken. The final study questionnaire (see Supplementary file 1)  
15 included questions relating to each of these five domains, one item related to adherence (missed medicine in  
16 the last 30 days) and an assessment of disabilities through completion of the validated postal version of the  
17 Barthel Index.<sup>28</sup> The questionnaire was adapted for caregivers (see Supplementary file 2).

### 18 Questionnaire finalisation

19 On the basis of the fourth workshop and two 'think-aloud' interviews, we reworded the survey  
20 questions (e.g. from 'Do you get help with' was changed into 'Is somebody helping you with') and used a  
21 scale response 'All the time', 'Often', 'Sometimes', 'Rarely', 'Never' for the first question of each of the five  
22 survey domains, which was originally conceived as a 'yes' or 'no' answer (see supplementary file for text of  
23 questions).



## Survey

### 2 **Practice characteristics**

18 GP practices agreed to take part in the study, of which just over 1/3 were in London (n=7). GP practices were relatively large with an average population of 11,904 patients (SD = 4010) and a low to moderate level of deprivation (Index of Multiple Deprivation<sup>32</sup> (IMD): Mean-7.05: SD-3.19). Out of 3066 patients on the stroke registers, 1687 stroke patients (55%) were considered eligible for the study and received the postal questionnaire. The average response rate of East of England and London practices was 42% and 27% respectively. The response rate varied between 16% and 53% across practices.

### 10 **Participant characteristics**

596 participants returned a completed questionnaire [549 (92.1 %) from patients, 47 (7.9 %) from caregivers showing a mean response rate of 35% (0.33-0.37). Participants were on average 72.7 yrs old. 37.8% (n=210) of the sample were female, see table 1. There were a high proportion of white patients in the recruited practices (79%), which were on average 21% of mixed or ethnic minority background. Approximately 28% of study participants were completely independent for ADLs.

Participants getting any kind of help with medicines were on average 73.6 years old, two thirds were male with only 19% of this group completely independent for ADLs.

Patients with unmet needs were on average 69 years old, predominantly male (71%) and 56.86% were severely dependent for ADLs. Patients who missed medications were on average 70 years old, 64% were male and the majority (48%) were moderately dependent for ADLs.

Table 1 here

## 1 Support with daily medication taking

2

3 Overall, 55.5% (95% CI: 51.7-59.7) of the participants received help in at least one aspect of taking  
4 medication, in that they ticked one of the options from 'all the time' to 'rarely' on one or more of the five  
5 questions related to medicine taking. 11% (95% CI: 8.8-13.9) of patients reported experiencing unmet needs  
6 and needing more help with at least one of the aspects of taking medication, in that they ticked 'yes' to the  
7 question "do you feel you need more help", on one or more of the five questions related to medicine taking.  
8 The proportion of questionnaires reporting unmet needs filled in by caregivers, 19.6% (n=9), and by patients,  
9 10.7% (n=57), had no significant difference (p=0.068).

10 Among participants help was needed to some degree with prescriptions and collection of medicines  
11 (49.8 %), getting medicines out of the box or packet (27.9 %), reminding to take medicines (36.4 %),  
12 swallowing medicines (20.2 %) and checking that medicines have been taken (34.1 %).(see Table 2). Being  
13 reminded to take medicines, dealing with prescriptions and collection of medicines and getting medicines out  
14 of a pack or bottle were the most commonly reported areas of unmet needs. Almost two thirds of participants  
15 (65.3%) reported never missing medicines in the last 30 days. Out of the 34.7% of patients who said they  
16 missed taking medicine at any point in the previous 30 days, 23.9% said rarely, 9.3% sometimes, 0.8% often  
17 and 0.7% all the time. The proportion of questionnaires reporting missing medication at some point, filled in  
18 by caregivers, 27.7% (n=13), and by patients 35.3% (n=193), had no significant difference (p=0.292).

19 Table 2 here

## 20 Factors associated with unmet needs

21 Being on a higher total number of daily medications (OR: 1.2, (1.1-1.3), p<0.001), severe  
22 dependence for ADLs (OR: 11.62 (4.16-32.43) p<0.001) and receiving any kind of help (OR: 5.6, (2.7-11.63),  
23 p<0.001) in relation to taking medication was associated with experiencing unmet needs. Getting help with  
24 swallowing medicines (OR: 6.8, (3.8-12.02), p<0.001), getting medicines out of a box, blister packs or bottles  
25 (OR: 6.5, (3.6-11.8), p<0.001) showed the strongest associations with experiencing unmet needs (see table 3).

1  
2  
3 1 When the analyses were conducted with data from questionnaires filled by patients only, the variables  
4 significantly associated with unmet needs were the same, apart from years since stroke (Supplementary  
5 2  
6 Appendix 1).  
7 3

8  
9 4 Table 3 here  
10  
11 5  
12  
13 6  
14 7

### 15 8 **Factors associated with missing medications**

16  
17  
18 9 Being older (age  $\geq 70$ ) was associated with a lower probability of missing medication (OR: 0.59  
19  
20 10 (0.41-0.86)  $p=0.006$ ). Being on a higher number of daily medicines (polypharmacy) (OR:1.07 (1.02-1.12),  
21  
22 11  $p=0.008$ ) and getting any kind of help with medicine taking (OR:2.08 (1.43-3.03)  $p<0.001$ ) was associated  
23  
24 12 with higher probability of missing medicines. The more unmet needs stroke survivors had with taking  
25  
26 13 medication, the more likely they were to miss their medicines (OR: 5.3 (3.0-9.5),  $p<0.001$ ). (see Table 4).  
27  
28 14 When the analyses were conducted with data from questionnaires filled by patients only, the variables  
29  
30 15 significantly associated with missing medication were the same (Supplementary Appendix 1).  
31  
32  
33 16  
34  
35 17  
36  
37  
38 18  
39  
40  
41 19  
42  
43  
44 20

45  
46  
47  
48  
49  
50  
51  
52  
53  
54  
55  
56  
57  
58  
59  
60

Table 4 here

## Discussion

### 21 **Summary of findings**

22 From workshops we identified 5 key issues that patients regarded as important with medication taking  
23 after stroke. We converted these into a five item questionnaire that we distributed to people on stroke registers  
24 in 18 general practices. We obtained a response rate of 35%. Among respondents, 56% of survivors in the  
25 community were receiving help in some aspect of daily medication taking, 11% reported needing more help in

1  
2  
3 1 at least one domain of medicine taking and 34% missed taking their medicines at some point in the previous  
4  
5 2 30 days.

6  
7 3 A higher total number of daily medicines, being severely dependent for ADLs and receiving help with  
8  
9 4 medication were predictors of experiencing at least one unmet need in respect of medication taking. Stroke  
10  
11 5 survivors who were younger, taking a higher number of daily medicines and experiencing a greater number of  
12  
13 6 unmet needs were more likely to miss medications.

14  
15 7 This work identified issues from a population that includes patients severely affected by stroke, who are often  
16  
17 8 excluded from research.<sup>17</sup> Results presented here shed light on the effect of stroke related impairments on  
18  
19 9 practical domains and predictors of medicine taking, which are shown to have significant effects on overall  
20  
21 10 adherence.

22  
23 11

24  
25 12

### 26 27 13 **Strengths and limitations**

28  
29 14 A strength of this study is that the questionnaire was developed from patients' and caregivers' own  
30  
31 15 views gathered through workshops. Although not recruited through purposive sampling, workshop participants  
32  
33 16 suffered from a range of stroke related impairments, as highlighted by the reported use of Dossette boxes,  
34  
35 17 dependence on others for aspects of medicine taking like prompting medication times, and dependence for  
36  
37 18 ADLs such as collecting prescriptions and taking tablets out of boxes. In the postal survey, the inclusion of  
38  
39 19 stroke survivors regardless of level of dependence for ADLs permitted investigating a population who are  
40  
41 20 understudied,<sup>17</sup> yet may have significant unmet needs that can affect their adherence to medications. This  
42  
43 21 investigation highlights caregivers' role in managing medicines in survivors dependent for ADLs.

44  
45 22 However, study limitations should also be considered. The response rate across recruited GP practices  
46  
47 23 was low and harder to reach stroke survivors may have been missed. Poor response rate is a source of bias that  
48  
49 24 might affect our estimates.

50  
51 25 Interestingly, considering the average age at stroke in England (i.e. 74 for men and 80 years for women<sup>19</sup>), our  
52  
53 26 participants' population was slightly younger (73 years), perhaps reflecting the fact that patients receiving  
54  
55 27 institutional long term care were excluded from the study or that older people found harder taking part in a  
56  
57 28 postal survey. Through the Barthel score, we did not assess cognition directly, although low cognitive function

1  
2  
3 1 is associated with poor adherence.<sup>33</sup> As the Barthel focuses on physical disability it is not known to what  
4  
5 2 extent study participants were cognitively impaired or suffered from communication difficulties like aphasia.  
6  
7 3 In addition, dependency for ADLs could have been caused by existing co-morbidities other than stroke. We  
8  
9 4 did not collect information on the use of blister packaged medication or devices to aid compliance, which  
10  
11 5 could have influenced medication taking practices. Finally this study examined all medicine taking and did not  
12  
13 6 differentiate between stroke secondary prevention medications and other drug categories.

### 7 **Comparisons with existing research**

8  
9 8 To our knowledge this is the first study that shows that more than half of all stroke survivors get help  
10  
11 9 with some aspect of medicine taking and that those receiving help are more likely to have unmet needs. This  
12  
13 10 provides some insight in to why adherence to medication in stroke survivors may be poor.<sup>34</sup>

14  
15 11 Moreover, the greater the number of medicines, the more likely stroke survivors were to miss  
16  
17 12 medications. Addressing pill burden by simplifying drug regimens may be an important focus for future  
18  
19 13 interventions. Indeed the polypill approach to medication taking has been shown to reduce cardiovascular as  
20  
21 14 well as total pill burden in a primary care setting.<sup>35</sup> Simpler dosing regimens, are known to be associated with  
22  
23 15 better medication adherence<sup>36</sup> while fewer medicines has been shown to be an independent predictor of long  
24  
25 16 term medication persistence among stroke survivors.<sup>37 38</sup> A recent trial incorporating a fixed-dose combination  
26  
27 17 polypill approach to taking cardiovascular medicine demonstrated better adherence among patients receiving a  
28  
29 18 single pill.<sup>39</sup>

30  
31 19 Receiving help with prescriptions and collecting medicines was identified as the area where most help  
32  
33 20 was received (49.7% of respondents). Stroke survivors who are dependent for activities of daily living may  
34  
35 21 face considerable practical challenges accessing health care resources at the pharmacy and the GP practice. A  
36  
37 22 recent study in the USA found that around 2/3 of caregivers were involved in at least 1 medication  
38  
39 23 management activity of elderly patients and that high involvement in Instrumental Activities of Daily Living  
40  
41 24 (IADLs) was associated with the caregiver providing the patient with assistance in ordering medicines.<sup>40</sup>  
42  
43 25 Filling prescriptions is also known to be an important factor influencing medication adherence.<sup>41 42</sup> Indeed  
44  
45 26 caregivers can play a significant role in ensuring appropriate medication taking. A recent interview study  
46  
47 27 exploring potential barriers and facilitators of medication adherence in stroke identified the central role of the  
48  
49 28 caregiver in medication adherence.<sup>43</sup> Our evaluation of an online stroke forum also confirmed the important

1  
2  
3 1 role of the caregiver in facilitating medication adherence.<sup>14</sup> Monitoring prescription collections, liaising with  
4  
5 2 the GP and pharmacy, increasing the time between prescriptions or arranging medication deliveries, may help  
6  
7 3 to address prescription needs.

8  
9 4         Around 11% of stroke survivors reported unmet medication needs. We found that stroke survivors  
10  
11 5 severely dependent for ADLs and receiving help with medicines were more likely to report unmet needs,  
12  
13 6 which is in line with a recent study investigating stroke/TIA survivors in Australia, where greater functional  
14  
15 7 ability was associated with fewer unmet needs, including those related to secondary prevention.<sup>44</sup> In previous  
16  
17 8 research on unmet needs among stroke survivors, a 44 item survey study by McKevitt and colleagues (2011)  
18  
19 9 reported that 49% of stroke survivors had at least one unmet need<sup>25</sup>, while in a study of Australian survivors  
20  
21 10 who completed a 58 item survey, the percentage was 84%.<sup>24</sup> Both these studies however examined unmet  
22  
23 11 needs over a variety of domains including health, work, leisure and everyday living, social support and  
24  
25 12 finances, whereas our study focused on medication needs only.

26  
27 13         Getting help to take medicines out of a box, packet or bottle was the area where the greatest proportion  
28  
29 14 of stroke survivors needed help all of the time. We previously found that the use of pill boxes and blister  
30  
31 15 packed medication to be both a facilitator<sup>35</sup> and a barrier<sup>14</sup> to adherence among stroke survivors<sup>15</sup>, while  
32  
33 16 interventions using blister packaging and pill boxes have been found to be associated with improved  
34  
35 17 adherence.<sup>45</sup> Although electronic medication devices were considered potentially effective in improving  
36  
37 18 medication taking behaviour among patients with cognitive impairments, success in using such devices was  
38  
39 19 dependent on the patient having a good level of dexterity, while removing the medication from these devices  
40  
41 20 was also found to be challenging.<sup>46 47 48</sup>

42  
43 21 The need for further support in this domain, as reported in the current study, suggests that handling  
44  
45 22 medications remains problematic for stroke survivors.

46  
47 23         An interesting finding from this survey study is that stroke survivors who missed medicines were  
48  
49 24 younger. This is consistent with other research on adherence in stroke that found that younger age was  
50  
51 25 predictive of poor adherence<sup>49</sup>, and has also been described in patients taking medication for cardiovascular  
52  
53 26 disease.<sup>50</sup> The finding in the present study contrasts with the view that older patients are more likely to face  
54  
55 27 difficulties taking medication<sup>51 52</sup> which is frequently attributed to higher number of pre-existing comorbidities  
56  
57 28 resulting in polypharmacy and increased complexity of medication taking regimens. The fact that older

1 patients may be less likely miss medicine might be down to the support they receive from caregivers. Our  
2 findings suggests that support needed with medications may be overlooked in younger stroke survivors.<sup>53</sup>

3 In this study a significant proportion of patients admitted missing medications occasionally. There is  
4 evidence that improving adherence by one anti-hypertensive pill/week for a once-a-day regimen reduces the  
5 hazard of stroke by 8–9 % and death by 7 %.<sup>54</sup> Each incremental 25% increase in proportion of days covered  
6 with statin medications is associated with a 0.10 mmol/L reduction in LDL-C cholesterol.<sup>55 56</sup> Non-adherence  
7 to cardiovascular medications is associated with increased risk of morbidity and mortality.<sup>57</sup>

### 8 9 **Implications for clinical practice**

10  
11 A significant proportion of patients, particularly those who take large numbers of tablets, are disabled  
12 or receive help to take medication, have unmet needs and miss their tablets, which can increase risk of  
13 recurrent cardiovascular events. These particularly vulnerable groups of patients might benefit from focused  
14 clinical attention. Through understanding the needs of survivors and caregivers in different aspects of daily  
15 medication taking, we can help direct future resources to the areas of greatest need. For example, further  
16 exploration of medication packaging is warranted to understand the difficulties stroke survivors face handling  
17 medicines. Polypharmacy remains a difficulty for older patients. Therefore, exploring the use of combination  
18 pills and further efforts to reduce the burden of multiple medications among stroke survivors is warranted.

19 The questionnaire we have developed could be used to understand the challenges around medication  
20 faced by other patient groups. Unmet medication needs among UK stroke survivors have not been previously  
21 explored in the context of activities both survivors and caregivers consider important for taking medicines.  
22 Through understanding the extent of unmet needs as well as the areas in which these are greatest, strategies  
23 can be developed which address poor medication taking practices and therefore improve medication  
24 adherence.

### 25 **Future research**

26  
27 Novel interventions focussing on the practicalities of taking medicines and aimed at improving stroke  
28 survivors' adherence to treatment are needed. The findings reported here may inform the development of such

1  
2  
3 1 interventions. Advances in technology have the potential to facilitate delivery of such interventions, e.g.  
4  
5 2 electronic devices prompting medication taking times.<sup>58 59</sup> Efforts to improve medication taking among  
6  
7 3 survivors of stroke using technology are already underway and have shown promise.<sup>60</sup> .  
8

9  
10 4 Acknowledgements

11 5 The authors wish to thank all the stroke survivors and caregivers who participated in this study.

12  
13 6 Competing interests

14  
15  
16 7 None declared

17  
18 8 Data sharing statement

19 9 No additional data are available

20  
21  
22  
23 10 Author/s contribution

24  
25  
26 11 ADS is the Chief Investigator, contributed to the study design, data analysis and commented on the  
27  
28 12 manuscript. JJ contributed to the study design, data collection, data analysis and prepared the manuscript for  
29  
30 13 submission. JM is a co-investigator on the study, wrote and commented on the manuscript. SS is a co-  
31  
32 14 investigator on the study, wrote and commented on the manuscript. LA contributed to the data analysis and  
33  
34 15 commented on the manuscript. GDiT contributed to the data analysis and commented on the manuscript. All  
35  
36 16 authors agreed on the final draft of the submitted manuscript.  
37  
38

39 17

40  
41  
42 18

43  
44  
45 19

46  
47  
48 20

49  
50  
51 21

52  
53  
54  
55 22



## References

1. Young J, Forster A. Review of stroke rehabilitation. *BMJ* 2007;334(7584):86-90. doi: 10.1136/bmj.39059.456794.68
2. Miller EL, Murray L, Richards L, et al. Comprehensive overview of nursing and interdisciplinary rehabilitation care of the stroke patient: a scientific statement from the American Heart Association. *Stroke* 2010 (Oct);41(10):2402-48. doi: 10.1161/STR.0b013e3181e7512b
3. Feigin VL, Barker-Collo S, Parag V, et al. Auckland Stroke Outcomes Study: Part 1: Gender, stroke types, ethnicity, and functional outcomes 5 years poststroke. *Neurology* 2010;75(18):1597-607. doi: 10.1212/WNL.0b013e3181fb44b3
4. Marek KD AL. Medication Management of the Community-Dwelling Older Adult. In: RG H, ed. An Evidence-Based Handbook for Nurses: Agency for Healthcare Research and Quality (US). Rockville, MD2008.
5. Lewis A. Non-compliance: A \$100 billion problem. . *The Remington Report* 1997;5:14-5.
6. National Audit Office. Progress in improving stroke care. In: Office NA, ed. London: Department of Health, 2010.
7. Park JH, Park JH, Lee SY, et al. Disparities in Antihypertensive Medication Adherence in Persons With Disabilities and Without Disabilities: Results of a Korean Population-Based Study. *Archives of Physical Medicine and Rehabilitation* 2008;89(8):1460-67. doi: <http://dx.doi.org/10.1016/j.apmr.2007.12.045>
8. Stilley CS, Bender CM, Dunbar-Jacob J, et al. The Impact of Cognitive Function on Medication Management: Three Studies. *Health psychology : official journal of the Division of Health Psychology, American Psychological Association* 2010;29(1):50-55. doi: 10.1037/a0016940
9. Smith D, Lovell J, Weller C, et al. A systematic review of medication non-adherence in persons with dementia or cognitive impairment. *PLoS ONE* 2017;12(2):e0170651. doi: 10.1371/journal.pone.0170651
10. Kronish IM, Ye S. Adherence to Cardiovascular Medications: Lessons Learned and Future Directions. *Progress in cardiovascular diseases* 2013;55(6):590-600. doi: 10.1016/j.pcad.2013.02.001

- 1  
2  
3 11. Gordon K, Smith F, Dhillon S. Effective chronic disease management: Patients' perspectives on  
4 medication-related problems. *Patient Education and Counseling* 2007;65(3):407-15. doi:  
5 2  
6 <http://dx.doi.org/10.1016/j.pec.2006.09.012>  
7 3
- 8  
9 12. Xu J, Zhao X, Wang Y, et al. Impact of a Better Persistence with Antihypertensive Agents on Ischemic  
10 Stroke Outcomes for Secondary Prevention. *PLoS ONE* 2013;8(6):e65233. doi:  
11 5  
12 10.1371/journal.pone.0065233  
13 6
- 14  
15 13. Colivicchi F, Bassi A, Santini M, et al. Discontinuation of Statin Therapy and Clinical Outcome After  
16 Ischemic Stroke. *Stroke* 2007;38(10):2652-57. doi: 10.1161/strokeaha.107.487017  
17 8
- 18  
19 14. Jamison J, Sutton S, Mant J, et al. Barriers and facilitators to adherence to secondary stroke prevention  
20 medications after stroke: Analysis of survivors and caregivers views from an online stroke forum.  
21 10  
22 *BMJ Open* 2017;7 (e016814)  
23 11
- 24  
25 15. Jamison J, Graffy J, Mullis R, et al. Barriers to medication adherence for the secondary prevention of  
26 stroke: a qualitative interview study in primary care. *The British Journal of General Practice*  
27 13  
28 2016;66(649):e568-e76. doi: 10.3399/bjgp16X685609  
29 14
- 30  
31 16. Souter C, Kinnear A, Kinnear M, et al. Optimisation of secondary prevention of stroke: a qualitative study  
32 of stroke patients' beliefs, concerns and difficulties with their medicines. *International Journal of*  
33 16  
34 *Pharmacy Practice* 2014;22(6):424-32. doi: 10.1111/ijpp.12104  
35 17
- 36  
37 17. De Simoni A, Mant J, Sutton S. Adherence to medication in stroke survivors dependent on caregivers.  
38 *British Journal of General Practice* 2015;65(640):e789.  
39 19
- 40  
41 18. De Simoni A, Hardeman W, Mant J, et al. Trials to Improve Blood Pressure Through Adherence to  
42 Antihypertensives in Stroke/TIA: Systematic Review and Meta-Analysis. *Journal of the American*  
43 21  
44 *Heart Association* 2013 (Aug 20);2(4):e000251. doi: 10.1161/jaha.113.000251  
45 22
- 46  
47 19. Royal College of Physicians. Sentinel Stroke National Audit Programme (SSNAP). National clinical audit  
48 annual results portfolio March 2015-April 2016. [Available from: <http://bit.ly/1M5R3Op>  
49 24
- 50  
51 20. Munger MA, Van Tassell BW, LaFleur J. Medication Nonadherence: An Unrecognized Cardiovascular  
52 Risk Factor. *Medscape General Medicine* 2007;9(3):58-58.  
53 26
- 54  
55 21. Brown MT, Bussell JK. Medication Adherence: WHO Cares? *Mayo Clinic proceedings* 2011;86(4):304-  
56 14. doi: 10.4065/mcp.2010.0575  
57 28

- 1  
2  
3 1 22. Wolff JL, Spillman B. Older Adults Receiving Assistance With Physician Visits and Prescribed  
4 Medications and Their Family Caregivers: Prevalence, Characteristics, and Hours of Care. *The*  
5 2  
6 3  
7 3  
8  
9 4 23. Ownby RL, Hertzog C, Crocco E, et al. Factors related to medication adherence in memory disorder clinic  
10 patients. *Aging & mental health* 2006;10(4):378-85. doi: 10.1080/13607860500410011  
11 5  
12  
13 6 24. Andrew NE, Kilkenny M, Naylor R, et al. Understanding Long-Term Unmet Needs in Australian  
14 Survivors of Stroke. *International Journal of Stroke* 2014;9(SA100):106-12. doi:  
15 7  
16 8  
17 8  
18 9 25. McKeivitt C, Fudge N, Redfern J, et al. Self-Reported Long-Term Needs After Stroke. *Stroke*  
19  
20 10  
21 10  
22 26. De Simoni A, Kellar I, Sutton S, et al. Developing a pharmacist intervention to improve adherence to  
23 11  
24 12  
25 12  
26 13 27. Braun V, Clarke V. Using thematic analysis in psychology. *Qualitative Research in Psychology*  
27 13  
28 14  
29 14  
30 15 28. Gompertz P, Pound P, Ebrahim S. A postal version of the Barthel Index. *Clinical Rehabilitation*  
31 15  
32 16  
33 16  
34 17 29. Quinn TJ, Langhorne P, Stott DJ. Barthel Index for Stroke Trials. *Development, Properties, and*  
35 17  
36 18  
37 18  
38 19 30. Wolfe CD, Taub NA, Woodrow EJ, et al. Assessment of scales of disability and handicap for stroke  
39 19  
40 20  
41 20  
42 21 31. Document Capture Company [Available from: [20](http://www.documentcapture.co.uk/data-collection-<br/>43 21<br/>44 22<br/>45 22<br/>46 23 32. Smith T, Noble, M, Noble S, et al. The English Indices of Deprivation 2015 Research report, 2015.<br/>47 23<br/>48 24 33. Hayes TL, Larimer N, Adami A, et al. Medication Adherence in Healthy Elders. <i>Journal of Aging and</i><br/>49 24<br/>50 25<br/>51 25<br/>52 26 34. Chowdhury R, Khan H, Heydon E, et al. Adherence to cardiovascular therapy: a meta-analysis of<br/>53 26<br/>54 27<br/>55 27<br/>56 28<br/>57 28<br/>58<br/>59<br/>60</p></div><div data-bbox=)

- 1  
2  
3 1 35. Truelove M, Patel A, Bompont S, et al. The Effect of a Cardiovascular Polypill Strategy on Pill Burden.  
4  
5 2 *Cardiovascular Therapeutics* 2015;33(6):347-52. doi: 10.1111/1755-5922.12151  
6  
7 3 36. Claxton AJ, Cramer, J., Pierce, C. A Systematic Review of the Associations Between Dose Regimens and  
8  
9 4 Medication Compliance *Clinical therapeutics* 2001;23(8):1296-310.  
10  
11 5 37. Bushnell CD, Olson DM, Zhao X, et al. Secondary preventive medication persistence and adherence 1 year  
12  
13 6 after stroke. *Neurology* 2011;77(12):1182-90. doi: 10.1212/WNL.0b013e31822f0423 [published  
14  
15 7 Online First: 2011/09/09]  
16  
17 8 38. Chapman RH, Benner JS, Petrilla AA, et al. Predictors of adherence with antihypertensive and lipid-  
18  
19 9 lowering therapy. *Archives of Internal Medicine* 2005;165(10):1147-52. doi:  
20  
21 10 10.1001/archinte.165.10.1147  
22  
23 11 39. Thom S, Poulter N, Field J, et al. Effects of a fixed-dose combination strategy on adherence and risk  
24  
25 12 factors in patients with or at high risk of CVD: the UMPIRE randomized clinical trial. *JAMA : the*  
26  
27 13 *journal of the American Medical Association* 2013;310(9):918-29. doi: 10.1001/jama.2013.277064  
28  
29 14 40. Noureldin M, Plake KS. Correlates of caregivers' involvement in the management of older adults'  
30  
31 15 medications. *Research in Social and Administrative Pharmacy* 2017;13(4):840-48. doi:  
32  
33 16 <https://doi.org/10.1016/j.sapharm.2016.09.009>  
34  
35 17 41. Andersson K, Melander A, Svensson C, et al. Repeat prescriptions: refill adherence in relation to patient  
36  
37 18 and prescriber characteristics, reimbursement level and type of medication. *European Journal of*  
38  
39 19 *Public Health* 2005;15(6):621-26. doi: 10.1093/eurpub/cki053  
40  
41 20 42. Vlasnik JJ, Aliotta SL, DeLor B. Medication adherence: Factors influencing compliance with prescribed  
42  
43 21 medication plans. *The Case Manager* 2005;16(2):47-51. doi:  
44  
45 22 <http://dx.doi.org/10.1016/j.casemgr.2005.01.009>  
46  
47 23 43. Bauler S, Jacquin-Courtois S, Haesebaert J, et al. Barriers and Facilitators for Medication Adherence in  
48  
49 24 Stroke Patients: A Qualitative Study Conducted in French Neurological Rehabilitation Units.  
50  
51 25 *European Neurology* 2014;72(5-6):262-70.  
52  
53 26 44. Olaiya MT, Cadilhac DA, Kim J, et al. Long-term unmet needs and associated factors in stroke or TIA  
54  
55 27 survivors: An observational study. *Neurology* 2017 (Jul 4);89(1):68-75. doi:  
56  
57 28 10.1212/wnl.0000000000004063  
58  
59  
60

- 1  
2  
3 1 45. Conn VS, Ruppap TM, Chan KC, et al. Packaging interventions to increase medication adherence:  
4  
5 2 systematic review and meta-analysis. *Current Medical Research and Opinion* 2015;31(1):145-60. doi:  
6  
7 3 10.1185/03007995.2014.978939  
8  
9 4 46. Hall J, Bond C, Kinnear M, et al. Views of patients and professionals about electronic multicompartiment  
10  
11 5 medication devices: a qualitative study. *BMJ Open* 2016;6:e012915. doi: 10.1136/bmjopen-2016-  
12  
13 6 012915  
14  
15 7 47. Beckman AGK, Parker MG, Thorslund M. Can elderly people take their medicine? *Patient Education and*  
16  
17 8 *Counseling* 2005;59(2):186-91. doi: <http://dx.doi.org/10.1016/j.pec.2004.11.005>  
18  
19 9 48. Notenboom K, Beers E, van Riet-Nales DA, et al. Practical Problems with Medication Use that Older  
20  
21 10 People Experience: A Qualitative Study. *Journal of the American Geriatrics Society*  
22  
23 11 2014;62(12):2339-44. doi: 10.1111/jgs.13126  
24  
25 12 49. O'Carroll R, Whittaker J, Hamilton B, et al. Predictors of adherence to secondary preventive medication in  
26  
27 13 stroke patients. *Ann Behav Med* 2011;41(3):383-90. doi: 10.1007/s12160-010-9257-6 [published  
28  
29 14 Online First: 2011/01/05]  
30  
31 15 50. Crowley MJ, Zullig LL, Shah BR, et al. Medication Non-Adherence After Myocardial Infarction: An  
32  
33 16 Exploration of Modifying Factors. *Journal of General Internal Medicine* 2015;30(1):83-90. doi:  
34  
35 17 10.1007/s11606-014-3072-x  
36  
37 18 51. Hughes CM. Medication Non-Adherence in the Elderly. *Drugs & Aging* 2004;21(12):793-811. doi:  
38  
39 19 10.2165/00002512-200421120-00004  
40  
41 20 52. De Schryver EL, van Gijn J, Kappelle LJ, et al. Non-adherence to aspirin or oral anticoagulants in  
42  
43 21 secondary prevention after ischaemic stroke. *J Neurol* 2005;252(11):1316-21. doi: 10.1007/s00415-  
44  
45 22 005-0858-0 [published Online First: 2005/05/04]  
46  
47 23 53. Kersten P, Low JTS, Ashburn A, et al. The unmet needs of young people who have had a stroke: results of  
48  
49 24 a national UK survey. *Disability and Rehabilitation* 2002;24(16):860-66. doi:  
50  
51 25 10.1080/09638280210142167  
52  
53 26 54. Bailey JE, Wan JY, Tang J, et al. Antihypertensive medication adherence, ambulatory visits, and risk of  
54  
55 27 stroke and death. *J Gen Intern Med* 2010;25(6):495-503. doi: 10.1007/s11606-009-1240-1 [published  
56  
57 28 Online First: 2010/02/19]

- 1  
2  
3 1 55. Amarenco P, Labreuche J. Lipid management in the prevention of stroke: review and updated meta-  
4  
5 2 analysis of statins for stroke prevention. *The Lancet Neurology* 2009;8(5):453-63. doi: 10.1016/s1474-  
6  
7 3 4422(09)70058-4 [published Online First: 2009/04/21]  
8  
9 4 56. Ho PM, Rumsfeld JS, Masoudi FA, et al. Effect of medication nonadherence on hospitalization and  
10  
11 5 mortality among patients with diabetes mellitus. *Arch Intern Med* 2006;166(17):1836-41. doi:  
12  
13 6 10.1001/archinte.166.17.1836 [published Online First: 2006/09/27]  
14  
15 7 57. Rasmussen JN, Chong A, Alter DA. Relationship between adherence to evidence-based pharmacotherapy  
16  
17 8 and long-term mortality after acute myocardial infarction. *Jama* 2007;297(2):177-86. doi:  
18  
19 9 10.1001/jama.297.2.177 [published Online First: 2007/01/11]  
20  
21 10 58. Tao D, Xie L, Wang T, et al. A meta-analysis of the use of electronic reminders for patient adherence to  
22  
23 11 medication in chronic disease care. *Journal of Telemedicine and Telecare* 2015;21(1):3-13. doi:  
24  
25 12 doi:10.1177/1357633X14541041  
26  
27 13 59. Thakkar J, Kurup R, Laba T, et al. Mobile telephone text messaging for medication adherence in chronic  
28  
29 14 disease: A meta-analysis. *JAMA Internal Medicine* 2016;176(3):340-49. doi:  
30  
31 15 10.1001/jamainternmed.2015.7667  
32  
33 16 60. Kamal AK, Shaikh Q, Pasha O, et al. A randomized controlled behavioral intervention trial to improve  
34  
35 17 medication adherence in adult stroke patients with prescription tailored Short Messaging Service  
36  
37 18 (SMS)-SMS4Stroke study. *BMC Neurology* 2015;15(1):212. doi: 10.1186/s12883-015-0471-5  
38  
39  
40  
41  
42  
43  
44  
45  
46  
47  
48  
49  
50  
51  
52  
53  
54  
55  
56  
57  
58  
59

|                                          | All patients |      |      |      | Patients who receive any kind of help |      |      |      | Patients with unmet needs |      |      |     | Patients who miss medication |      |      |      |
|------------------------------------------|--------------|------|------|------|---------------------------------------|------|------|------|---------------------------|------|------|-----|------------------------------|------|------|------|
|                                          | N            | %    | Mean | SD   | N                                     | %    | Mean | SD   | N                         | %    | Mean | SD  | N                            | %    | Mean | SD   |
| Age                                      | 588          |      | 72.7 | 11.6 | 331                                   |      | 73.6 | 12.2 | 64                        |      | 68.8 |     | 203                          |      | 70.5 | 13.0 |
| Female                                   | 210          | 37.8 |      |      | 112                                   | 36.2 |      |      | 18                        | 28.6 |      |     | 68                           | 35.6 |      |      |
| Male                                     | 346          | 67.2 |      |      | 197                                   | 63.2 |      |      | 45                        | 71.4 |      |     | 123                          | 64.4 |      |      |
| Time since stroke                        | 535          |      | 7.7  | 7.6  | 295                                   |      | 7.97 | 8.5  | 61                        |      | 9.3  | 9.2 | 186                          |      | 7.7  | 8.5  |
| N of daily medicines                     | 557          |      | 6.4  | 4    | 312                                   |      | 7.3  | 4.5  | 59                        |      | 9.7  | 7.1 | 190                          |      | 6.9  | 4.1  |
| Independent for ADLs (BI=20)             | 139          | 28.3 |      |      | 53                                    | 18.9 |      |      | 5                         | 9.8  |      |     | 45                           | 25.7 |      |      |
| Moderately dependent for ADLs (BI=15-19) | 231          | 47.1 |      |      | 130                                   | 46.4 |      |      | 17                        | 33.3 |      |     | 84                           | 48.0 |      |      |
| Severely dependent for ADLs (BI=0-14)    | 121          | 24.6 |      |      | 97                                    | 34.6 |      |      | 29                        | 56.9 |      |     | 46                           | 26.3 |      |      |

Table 1. Characteristics of participants who took part in the survey study (*mean scores reported unless otherwise stated*). N represents the number of participants who completed the survey in respect to the different variables. BI: Barthel Index.



|                                                                                                                  | <b>N</b> | <b>All the Time<br/>N (%)</b> | <b>Often<br/>N (%)</b> | <b>Sometimes<br/>N (%)</b> | <b>Rarely<br/>N (%)</b> | <b>Never<br/>N (%)</b> | <b>Yes<br/>N (%)</b> | <b>No<br/>N (%)</b> |
|------------------------------------------------------------------------------------------------------------------|----------|-------------------------------|------------------------|----------------------------|-------------------------|------------------------|----------------------|---------------------|
| Question 1<br>Is somebody helping with prescriptions and collection of your medicines?                           | 583      | 186<br>(31.9)                 | 19<br>(3.3)            | 40<br>(6.9)                | 45<br>(7.7)             | 293<br>(50.2)          |                      |                     |
| Question 1a<br>Do you feel you need more help with prescriptions and collection of your medicines?               | 551      |                               |                        |                            |                         |                        | 33<br>(6.0)          | 518<br>(94.0)       |
| Question 2<br>Is somebody helping you getting the medicines out of the box, bottle or blister pack?              | 578      | 85<br>(14.7)                  | 15<br>(2.6)            | 31<br>(5.4)                | 30<br>(5.2)             | 417<br>(72.1)          |                      |                     |
| Question 2a<br>Do you feel you need more help with getting the medicines out of the box, bottle or blister pack? | 553      |                               |                        |                            |                         |                        | 33<br>(6.0)          | 520<br>(94.0)       |
| Question 3<br>Is somebody helping with reminding you when is the time to take your medicine?                     | 577      | 78<br>(13.6)                  | 22<br>(3.8)            | 59<br>(10.2)               | 51<br>(8.8)             | 367<br>(63.6)          |                      |                     |
| Question 3a<br>Do you feel you need more help with reminding when is the time to take your medicine?             | 564      |                               |                        |                            |                         |                        | 35<br>(6.2)          | 529<br>(93.8)       |
| Question 4<br>Is somebody helping you with swallowing your medicine?                                             | 579      | 56<br>(9.7)                   | 11<br>(1.9)            | 29<br>(5.0)                | 21<br>(3.6)             | 462<br>(79.8)          |                      |                     |
| Question 4a<br>Do you feel you need more help with swallowing your medicine?                                     | 560      |                               |                        |                            |                         |                        | 9<br>(1.6)           | 551<br>(98.4)       |
| Question 5<br>Is somebody helping you with checking that you have taken your medicines?                          | 576      | 76<br>(13.2)                  | 23<br>(4.0)            | 58<br>(10.0)               | 40<br>(6.9)             | 379<br>(65.9)          |                      |                     |
| Question 5 a<br>Do you feel you need more help with checking that you have taken your medicine?                  | 558      |                               |                        |                            |                         |                        | 20<br>(3.6)          | 538<br>(96.4)       |
| Thinking of the last 30 days, how often did you miss taking your regular medicines?                              | 594      | 4<br>(0.7)                    | 5<br>(0.8)             | 55<br>(9.3)                | 142<br>(23.9)           | 388<br>(65.3)          |                      |                     |

Table 2. Results summarising participants' responses to the survey questions.



| Variable                                                                  | Univariable analysis |                                | Multivariable analysis |                                |
|---------------------------------------------------------------------------|----------------------|--------------------------------|------------------------|--------------------------------|
|                                                                           | N                    | Odds ratio (95% CI)<br>p value | N                      | Odds ratio (95% CI)<br>p value |
| Age ≥70                                                                   | 581                  | 0.6 (0.4-1.1) p=0.084          | 544                    | 0.7 (0.4-1.2) p=0.180          |
| Gender (female)                                                           | 544                  | 0.7 (0.4-1.2) p=0.137          | 544                    | 0.7 (0.4-1.2) p=0.147          |
| Number of different medicines                                             | 542                  | 1.2 (1.1-1.3) p<0.001          | 509                    | 1.2 (1.1-1.3) p<0.001          |
| Moderate Dependence for ADLs (BI: 15-19)                                  | 479                  | 2.2 (0.8-6.1) p=0.135          | 447                    | 2.7 (1.0-7.5) p=0.068          |
| Severe Dependence for ADLs (BI: 0-14)                                     | 479                  | 8.5 (3.2-22.8) p<0.001         | 447                    | 11.6 (4.2-32.4) p<0.001        |
| Years since stroke                                                        | 522                  | 1.0 (1.0-1.1) p=0.078          | 490                    | 1.0 (1.0-1.1) p=0.160          |
| Getting help with prescriptions and collection of medication              | 568                  | 4.7 (2.5-8.8) p<0.001          | 533                    | 4.6 (2.4-8.7) p<0.001          |
| Getting help with taking medicines out of the box, bottle or blister pack | 563                  | 6.7 (3.8-11.8) p<0.001         | 527                    | 6.6 (3.6-11.8) p<0.001         |
| Getting help with reminding you when is the time to take your medicine?   | 562                  | 4.7 (2.7-8.2) p<0.001          | 526                    | 4.3 (2.4-7.6) p<0.001          |
| Getting help to swallow the medication                                    | 565                  | 6.7 (3.9-11.6) p<0.001         | 528                    | 6.8 (3.8-12.0) p<0.001         |
| Getting help by checking that you have taken your medicines               | 562                  | 4.9 (2.8-8.6) p<0.001          | 526                    | 5.9 (3.1-10.1) p<0.001         |
| Getting any kind of help                                                  | 574                  | 5.9 (2.8-12.1) p<0.001         | 537                    | 5.9 (2.7-11.6) p<0.001         |

Table 3. Results of the multivariable analysis showing the variables associated with unmet needs.

N: number of observations; ADLs: Activities of daily living; BI: Barthel Index.

| Variable                                                                  | Univariable analysis |                             | Multivariable analysis |                             |
|---------------------------------------------------------------------------|----------------------|-----------------------------|------------------------|-----------------------------|
|                                                                           | N                    | Odds Ratio (95% CI) p value | N                      | Odds Ratio (95% CI) p value |
| Age ≥70                                                                   | 594                  | 0.6 (0.4-0.8) p=0.003       | 555                    | 0.6 (0.4-0.9) p=0.006       |
| Gender (female)                                                           | 555                  | 0.9 (0.6-1.2) p=0.401       | 555                    | 0.9 (0.6-1.3) p=0.498       |
| Number of different medicines                                             | 555                  | 1.0 (1.0-1.1) p=0.040       | 520                    | 1.1 (1.0-1.1) p=0.008       |
| Moderate Dependence for ADLs (BI: 15-19)                                  | 490                  | 1.2 (0.8-1.8) p=0.468       | 456                    | 1.3 (0.8-2.0) p=0.343       |
| Severe dependence for ADLs (BI 0-14)                                      | 490                  | 1.3 (0.8-2.1) p=0.342       | 456                    | 1.4 (0.8-2.4) p=0.239       |
| Years since stroke                                                        | 533                  | 1.0 (0.9-1.0) p=0.950       | 499                    | 1.0 (0.9-1.0) p=0.971       |
| Getting help with prescriptions and collection of medication              | 581                  | 2.0 (1.5-2.9) p<0.001       | 544                    | 2.3 (1.6-3.3) p<0.001       |
| Getting help to have the medicines out of the box, bottle or blister pack | 576                  | 1.4 (1.0-2.0) p=0.089       | 538                    | 1.5 (1.0-2.2) p=0.051       |
| Getting help with reminding you when is the time to take your medicine?   | 575                  | 2.5 (1.7-3.6) p<0.001       | 537                    | 2.7 (1.8-3.9) p<0.001       |
| Getting help to swallow the medication                                    | 578                  | 1.5 (1.0-2.3) p=0.045       | 539                    | 1.7 (1.1-2.6) p=0.022       |
| Getting help by checking that you have taken your medicines               | 576                  | 2.4 (1.7-3.4) p<0.001       | 537                    | 2.5 (1.7-3.7) p<0.001       |
| Getting any kind of help                                                  | 587                  | 2.1 (1.4-3.0) p<0.001       | 548                    | 2.1 (1.4-3.0) p<0.001       |
| Unmet needs (participant reported more help needed)                       | 580                  | 5.3 (3.0-9.2) p<0.000       | 544                    | 5.3 (3.0-9.4) p<0.001       |

Table 4. Results of univariable and multivariable analysis showing associations with missing medicines. N: number of observations; ADLs: Activities of daily living; BI: Barthel Index.

| Variable                                                                  | Unmet needs |                                | Missing medication |                                |
|---------------------------------------------------------------------------|-------------|--------------------------------|--------------------|--------------------------------|
|                                                                           | N           | Odds ratio (95% CI)<br>p value | N                  | Odds ratio (95% CI)<br>p value |
| Age ≥70                                                                   | 498         | 0.7 (0.4-1.2) p=0.248          | 508                | 0.6 (0.4-0.9) p=0.009          |
| Gender (female)                                                           | 498         | 0.7 (0.4-1.3) p=0.262          | 508                | 0.9 (0.6-1.3) p=0.576          |
| Number of different medicines                                             | 465         | 1.2 (1.1-1.3) p<0.001          | 475                | 1.1 (1.0-1.1) p=0.015          |
| Moderate Dependence for ADLs (BI: 15-19)                                  | 408         | 2.6 (0.9-7.5) p<0.075          | 417                | 0.3 (-0.2-0.7) p=0.289         |
| Severe Dependence for ADLs (BI: 0-14)                                     | 408         | 10.9 (3.8-31.0) p<0.001        | 417                | 0.5 (-0.1-1.0) p=0.119         |
| Years since stroke                                                        | 446         | 1.0 (1.0-1.1) p=0.036          | 454                | 1.0 (0.9-1.03) p=0.725         |
| Getting help with prescriptions and collection of medication              | 487         | 4.6 (2.4-8.9) p<0.001          | 497                | 2.6 (1.8-3.8) p<0.001          |
| Getting help with taking medicines out of the box, bottle or blister pack | 481         | 6.6 (3.6-12.2) p<0.001         | 491                | 1.7 (1.1-2.6) p=0.20           |
| Getting help with reminding you when is the time to take your medicine?   | 480         | 4.7 (2.6-8.5) p<0.001          | 490                | 3.0 (2.0-4.5) p<0.001          |
| Getting help to swallow the medication                                    | 482         | 7.8 (4.2-14.8) p<0.001         | 492                | 2.1 (1.3-3.4) p=0.005          |
| Getting help by checking that you have taken your medicines               | 480         | 5.9 (3.2-10.9) p<0.001         | 490                | 2.8 (1.8-4.2) p<0.001          |
| Getting any kind of help                                                  | 491         | 5.6 (2.7-11.9) p<0.001         | 501                | 2.3 (1.6-3.4) p<0.001          |

Supplementary Appendix 1. Predictors of unmet needs and missing medication, responses given by patients only (i.e. caregivers' filled questionnaire excluded). Multivariable analyses, all models adjusted for age and gender. N: number of observations.

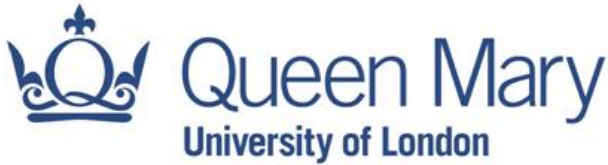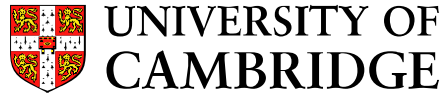

### QUESTIONNAIRE – PATIENT

Many people with stroke need help with taking their medicines. We would like to ask you few questions about the help you might need with taking your medicines.

How many different type of medicines do you take in one day?   
*Write the number or an approximation. Please count all medications including eye drops, injections etc.*

How old are you?  How long ago was your stroke?  years

What is your sex?  M  F

For each question below, please tick the box that best describes how you have taken your medicines in the last month:

**1. Is somebody helping with prescriptions and collection of your medicines?** all the time   
often   
sometimes   
rarely   
never

Do you feel you need more help with prescriptions and collection of your medicines?

Yes  No

**2. Is somebody helping you getting the medicines out of the box, bottle or blister pack?** all the time   
often   
sometimes   
rarely   
never

Do you feel you need more help with getting the medicines out of the box, bottle or blister pack?

Yes  No

1  
2  
3  
4  
5

6  
7  
8  
9

**3. Is somebody helping with reminding you when is the time to take your medicine?**

all the time  
often  
sometimes  
rarely  
never

10  
11  
12  
13  
14

Do you feel you need more help with reminding when is the time to take your medicine?

15  
16  
17  
18  
19  
20  
21  
22

Yes  No

23  
24  
25  
26  
27  
28  
29

**4. Is somebody helping you with swallowing your medicine? For example by giving you a drink**

all the time  
often  
sometimes  
rarely  
never

30  
31  
32  
33  
34

Do you feel you need more help with swallowing your medicine?

35  
36  
37  
38

Yes  No

39  
40  
41  
42  
43  
44

**5. Is somebody helping you with checking that you have taken your medicines?**

all the time  
often  
sometimes  
rarely  
never

45  
46  
47  
48

Do you feel you need more help with checking that you have taken your medicine?

49  
50  
51

Yes  No

52  
53

**Missing medicines**

54  
55  
56  
57

Thinking of the last 30 days, how often did you miss taking your regular medicines?

all the time  
often  
sometimes  
rarely  
never

58  
59  
60

*Remember - tick one box only*

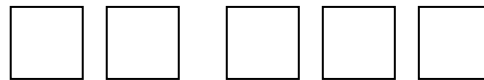

## Barthel Questionnaire

These are some questions about your ability to look after yourself.

They may not seem to apply to you.

Please answer them all.

Tick one box in each section.

### Bathing

In the bath or shower do you:

manage on your own?

need help getting in and out?

*Remember - tick one box only*

need other help?

never have a bath or shower?

need to be washed in bed?

|  |
|--|
|  |
|  |
|  |
|  |
|  |

### Stairs

Do you climb stairs at home:

without any help?

with someone carrying your frame?

*Remember - tick one box only*

with someone encouraging you?

with physical help?

not at all?

don't have stairs?

|  |
|--|
|  |
|  |
|  |
|  |
|  |
|  |

### Dressing

Do you get dressed:

without any help?

just with help with buttons?

*Remember - tick one box only*

with someone helping you most of the time?

|  |
|--|
|  |
|  |
|  |

### Mobility

Do you walk indoors:

without any help apart from a frame?

with one person watching over you?

*Remember - tick one box only*

with one person helping you?

with more than one person helping?

not at all?

Or do you use a wheelchair independently?  
(e.g. round corners)

|  |
|--|
|  |
|  |
|  |
|  |
|  |
|  |

### Transfer

Do you move from bed to chair:

on your own?

with a little help from one person?

*Remember - tick one box only*

with a lot of help from one or more people?

not at all?

|  |
|--|
|  |
|  |
|  |
|  |

|                          |                          |                          |                          |                          |
|--------------------------|--------------------------|--------------------------|--------------------------|--------------------------|
| <input type="checkbox"/> | <input type="checkbox"/> | <input type="checkbox"/> | <input type="checkbox"/> | <input type="checkbox"/> |
|--------------------------|--------------------------|--------------------------|--------------------------|--------------------------|

**Feeding**

Do you eat food: without any help?   
with help cutting food or spreading butter?   
*Remember - tick one box only* with more help?

**Toilet use**

Do you use a toilet or commode: without any help?   
with some help but can do something?   
*Remember - tick one box only* with quite a lot of help?

**Grooming**

Do you brush your hair and teeth without help?   
Wash your face and shave: with help?   
*Remember - tick one box only*

**Bladder**

Are you incontinent of urine? never   
less than once a week   
*Remember - tick one box only* less than once a day   
more often   
Or do you have a catheter managed for you

**Bowels**

Do you soil yourself? never   
Occasional accident   
*Remember - tick one box only* all the time   
or do you need someone to give you an enema?

.   
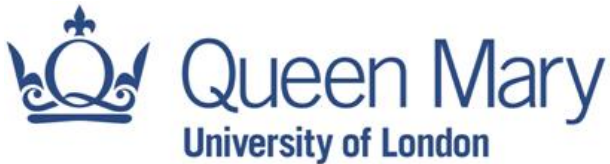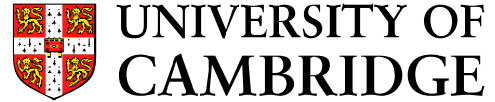

## Help with taking tablets after stroke

### FAMILY MEMBER/FRIEND OR PRIVATE CARER COPY

Many people with stroke need help with taking their medicines. We would like to ask you few questions about the help you might be offering to your family member/friend/ patient with stroke with taking medicines.

#### Relation with your family member/friend with stroke

Are you:

partner  
son or daughter  
friend  
carer from an agency  
other  
if other, please specify  
-----

  
  
  
  


*Remember - tick one box only*

How many different types of medicines does your family member/friend/patient with stroke take in one day?  
*Write the number or an approximation. Please count all medications including eye drops, injections etc.*

How old is your family member/friend/patient with stroke? (years)

How many years ago was your family member/friend/patient's stroke?

What is your family member/friend/patient with stroke sex?

 M

 F

For each question below, please tick the box that best describes the help needed by your family member/friend/patient with stroke with taking medicines in the last month.

**1. Is somebody helping your family member/friend/patient with stroke with prescriptions and collection of his/her medicines?**

all the time  
often  
sometimes  
rarely  
never

  
  
  
  


Do you feel your family member/friend/patient with stroke needs more help with prescriptions and collection of his/her medicines?

Yes

No



.

2. **Is somebody helping your family member/friend/patient with stroke getting the medicines out of the box, bottle or blister pack?**

all the time   
 often   
 sometimes   
 rarely   
 never

Do you feel your family member/friend/patient with stroke needs more help with getting the medicines out of the box, bottle, or blister pack?

Yes  No

3. **Is somebody helping your family member/friend/patient with stroke with reminding when is time to take his/her medicine?**

all the time   
 often   
 sometimes   
 rarely   
 never

Do you feel your family member/friend/patient with stroke needs more help with reminding when is time to take his/her medicine?

Yes  No

4. **Is somebody helping your family member/friend/patient with stroke with swallowing his/her medicine? For example by giving a drink.**

all the time   
 often   
 sometimes   
 rarely   
 never

Do you feel you your family member/friend/patient with stroke need more help with swallowing his/her medicine?

Yes  No

5. **Is somebody helping your family member/friend/patient with stroke with checking that he/she has taken his/her medicines?**

all the time   
 often   
 sometimes   
 rarely   
 never

Do you feel your family member/friend/patient with stroke needs more help with checking that he/she has taken his/her medicine?

Yes  No



**Missing medicines**

Thinking of the last 30 days, how often did your family member/friend/patient with stroke miss taking his/her regular medicines?

- all the time
- often
- sometimes
- rarely
- never

|  |
|--|
|  |
|  |
|  |
|  |
|  |

*Remember - tick one box only*

**Barthel Questionnaire**

These are some questions about the ability of your family member/friend/patient with stroke to look after him/herself.

Please answer them all.

Please fill this questionnaire even if you are not regularly caring for your family member/friend/patient with stroke, trying to answer questions in the way you think most accurately describes the disability of your family member/friend/patient with stroke.

Tick one box in each section.

**Bathing**

In the bath or shower do you:

- manage on your own?
- need help getting in and out?
- need other help?
- never have a bath or shower?
- need to be washed in bed?

*Remember - tick one box only*

|  |
|--|
|  |
|  |
|  |
|  |
|  |

**Stairs**

Do you climb stairs at home:

- without any help?
- with someone carrying your frame?
- with someone encouraging you?
- with physical help?
- not at all?
- don't have stairs?

*Remember - tick one box only*

|  |
|--|
|  |
|  |
|  |
|  |
|  |
|  |

**Dressing**

Do you get dressed:

- without any help?
- just with help with buttons?
- with someone helping you most of the time?

*Remember - tick one box only*

|  |
|--|
|  |
|  |
|  |

**Mobility**

Do you walk indoors:

- without any help apart from a frame?
- with one person watching over you?
- with one person helping you?

*Remember - tick one box only*

|  |
|--|
|  |
|  |
|  |

.

with more than one person helping?  
 not at all?  
 Or do you use a wheelchair independently?  
 (e.g. round corners)

**Transfer**

Do you move from bed to chair:  
*Remember - tick one box only*

on your own?  
 with a little help from one person?  
 with a lot of help from one or more people?  
 not at all?

**Feeding**

Do you eat food:  
*Remember - tick one box only*

without any help?  
 with help cutting food or spreading butter?  
 with more help?

**Toilet use**

Do you use a toilet or commode:  
*Remember - tick one box only*

without any help?  
 with some help but can do something?  
 with quite a lot of help?

**Grooming**

Do you brush your hair and teeth  
 Wash your face and shave:  
*Remember - tick one box only*

without help?  
 with help?

**Bladder**

Are you incontinent of urine?  
*Remember - tick one box only*

never  
 less than once a week  
 less than once a day  
 more often  
 Or do you have a catheter managed for you

**Bowels**

Do you soil yourself?  
*Remember - tick one box only*

never  
 Occasional accident  
 all the time  
 or do you need someone to give you an enema?

# BMJ Open

## Evaluating practical support stroke survivors get with medicines and unmet needs in primary care: A survey

|                                 |                                                                                                                                                                                                                                                                                                                                                                                                                                                                   |
|---------------------------------|-------------------------------------------------------------------------------------------------------------------------------------------------------------------------------------------------------------------------------------------------------------------------------------------------------------------------------------------------------------------------------------------------------------------------------------------------------------------|
| Journal:                        | <i>BMJ Open</i>                                                                                                                                                                                                                                                                                                                                                                                                                                                   |
| Manuscript ID                   | bmjopen-2017-019874.R2                                                                                                                                                                                                                                                                                                                                                                                                                                            |
| Article Type:                   | Research                                                                                                                                                                                                                                                                                                                                                                                                                                                          |
| Date Submitted by the Author:   | 23-Jan-2018                                                                                                                                                                                                                                                                                                                                                                                                                                                       |
| Complete List of Authors:       | JAMISON, JAMES; UNIVERSITY OF CAMBRIDGE, PUBLIC HEALTH & PRIMARY CARE<br>Ayerbe, Luis; Queen Mary University of London, Centre for Primary Care and Public Health<br>Di Tanna, Gian Luca; Queen Mary University of London<br>Sutton, Stephen; University of Cambridge,<br>Mant, Jonathan; University of Cambridge, General Practice and Primary Care Research Unit<br>De Simoni, Anna; Queen Mary University of London, Centre for Primary Care and Public Health |
| <b>Primary Subject Heading</b>: | Cardiovascular medicine                                                                                                                                                                                                                                                                                                                                                                                                                                           |
| Secondary Subject Heading:      | Cardiovascular medicine, Public health, General practice / Family practice                                                                                                                                                                                                                                                                                                                                                                                        |
| Keywords:                       | Medication adherence, Caregivers, Barthel, STROKE MEDICINE                                                                                                                                                                                                                                                                                                                                                                                                        |
|                                 |                                                                                                                                                                                                                                                                                                                                                                                                                                                                   |

SCHOLARONE™  
Manuscripts

only

**Evaluating practical support stroke survivors get with medicines and unmet needs in primary care: A survey**

\*James Jamison<sup>1</sup>, MSc

Luis Ayerbe<sup>2</sup>, PhD

Gian Luca Di Tanna<sup>2</sup> PhD

Stephen Sutton<sup>1</sup>, PhD

Jonathan Mant<sup>1</sup>, MD

Anna De Simoni<sup>2</sup>, PhD

<sup>1</sup>Primary Care Unit, Department of Public Health & Primary Care, Forvie Site, University of Cambridge School of Clinical Medicine, Box 113 Cambridge Biomedical Campus, Cambridge, CB2 0SR.

<sup>2</sup>Centre for Primary Care and Public Health, Barts and The London School of Medicine and Dentistry, Yvonne Carter Building, London E1 2AB.

\*corresponding author: James Jamison; Tel: +44 (0)1223 768272. Fax: +44 (0)1223 763492. Email: [jj285@medschl.cam.ac.uk](mailto:jj285@medschl.cam.ac.uk)



## 1 **Conclusions**

2 More than half of patients who replied needed help with taking medication, and 1 in 10 had unmet needs in  
3 this regard. Stroke survivors dependent on others have more unmet needs, more likely to miss medicines and  
4 might benefit from focused clinical and research attention. Novel primary care interventions focusing on the  
5 practicalities of taking medicines are warranted.

6 Abstract word count- 298

7  
8 Keywords: Stroke, Medication Adherence, Caregivers, Barthel

### 9 10 Article summary

#### 11 Strengths and Limitations

- 12 • Development of the questionnaire was based on patients' and caregivers' own views gathered through  
13 workshops.
- 14 • Stroke survivors were recruited from two UK regions.
- 15 • This work identified issues from a population that includes patients severely affected by stroke, who  
16 are often excluded from research.
- 17 • Results shed light on the effect of stroke related impairments on practical domains and predictors of  
18 medicine taking, which have significant effects on medication adherence and call for new primary care  
19 interventions.
- 20 • The low response rate reported is a limitation of this study and stroke survivors who are harder to  
21 reach may have been missed.

22  
23 Funding: This study was funded by the RCGP SFB, Ref. SFB 2014 – 15 'Quantifying the support stroke  
24 survivors get with daily medication taking: a questionnaire survey'. Anna De Simoni and Luis Ayerbe are  
25 funded by a NIHR Academic Clinical Lectureships. This article therefore presents independent research  
26 funded by NIHR. The views expressed are those of the authors and not necessarily those of the NHS, the  
27 NIHR, or the Department of Health. James Jamison was supported by a research grant from The Stroke  
28 Association and the British Heart Foundation: TSA BHF 2011/01

1

2  
3  
4  
5 2 Data sharing statement: No additional data available.

6

7

## 8 Introduction

9

10  
11  
12  
13 6 Stroke is the leading cause of disability in developed countries, with an estimated that 25-74% of the  
14  
15 7 50 million stroke survivors worldwide requiring some assistance or being fully dependent on caregivers for  
16  
17 8 activities of daily living (ADLs).<sup>1-3</sup> For many older adults remaining independent at home may depend on how  
18  
19 9 well they can manage complex medication regimens.<sup>4,5</sup> Around half of stroke survivors are dependent on  
20  
21 10 others for everyday activities.<sup>6</sup>

22  
23 11 There is evidence that being dependent for ADLs and impairment in mobility and communication  
24  
25 12 decrease medication adherence in patients suffering from hypertension.<sup>7</sup> Deficits in attention, cognition or  
26  
27 13 working memory have been linked with non-adherence to medications in other patient groups.<sup>8</sup> In a recent  
28  
29 14 systematic review of medication adherence among patients with cognitive impairment, one third of studies  
30  
31 15 showed that such patients were likely to have a caregiver to assist with medications and there was an  
32  
33 16 association between taking four or more medicines and nonadherence.<sup>9</sup> In patients taking cardiovascular  
34  
35 17 medicines, multiple factors including cognitive problems, lack of social support, dosing regimen, as well as  
36  
37 18 practical problems and difficulties accessing services, contribute to poor medication adherence.<sup>10 11</sup> Low  
38  
39 19 adherence to secondary prevention medication is associated with poor cardiovascular health.<sup>12 13</sup>

40  
41 20 Stroke survivors have previously reported difficulties in the handling of medication as a barrier to  
42  
43 21 adherence to secondary prevention medication after stroke.<sup>14</sup> This was true irrespective of age at stroke, with  
44  
45 22 younger and older stroke survivors being similarly affected.<sup>14</sup> Research on medication adherence in stroke has  
46  
47 23 identified multiple barriers to medication taking among stroke survivors.<sup>14-16</sup> However interventions developed  
48  
49 24 to improve adherence have mainly concentrated on patients responsible for their own medicine taking.<sup>17 18</sup>

50  
51 25 In England, the average age at stroke is 74 for men and 80 years for women.<sup>19</sup> In elderly patients in  
52  
53 26 particular, cognitive deficits, taking large number of medicines and the complexity of medication regimens  
54  
55 27 have been identified as barriers to medication adherence.<sup>20 21</sup> Caregivers are known to play a key role in



1  
2  
3 1 providing assistance to older people in a range of daily activities including medication taking and physician  
4 visits,<sup>22</sup> and can help improve adherence in cardiac patients with memory problems.<sup>23</sup>  
5  
6  
7 3  
8  
9 4  
10

11 5 Survivors of stroke have previously reported unmet needs including physical difficulties, cognitive  
12 and emotional difficulties, information needs and other unmet needs.<sup>24 25</sup> However we know little about factors  
13 that influence medication taking among stroke survivors with disabilities (i.e. physical or cognitive) living in  
14 the community (i.e. not in nursing homes), their unmet needs around the use of medicines or the proportion  
15 relying on caregivers for some or all aspects of medicine taking.  
16  
17 8  
18  
19 9

20 10 To date, survey instruments examining the unmet needs of stroke survivors have not focused on practical  
21 aspects of medication taking such as how patients collect or handle their medicines.  
22  
23 11

24 12 The aims of this investigation were to design an instrument to evaluate the support stroke survivors get  
25 with taking their medicines, characterise patients receiving help with medications, estimate the proportion who  
26 have unmet needs with daily medicine taking and who miss medications. We additionally aimed to identify the  
27 predictors of missing medicines and of experiencing unmet needs with medications.  
28  
29 14  
30  
31 15

32 16 This knowledge can inform the development of primary care interventions aimed at improving medication  
33 taking in this patients' group.  
34  
35 17

## 36 18 Methods

### 37 19 38 39 19 40 41 20 **Questionnaire development workshops**

42 21 To develop the questionnaire, current literature evidence was evaluated<sup>17</sup> and three workshops were  
43 conducted with 26 stroke survivors and 12 caregivers in the East of England (St John's College, Cambridge  
44 2009<sup>26</sup>: 7 patients, 1 caregiver; Different Strokes, Cambridge 2012: 9 patients, 3 caregivers; Peterborough,  
45 2012: 10 patients, 8 caregivers). Recruitment was opportunistic and no purposive sampling was applied. The  
46 workshops were organised in the context of gathering Patient and Public Involvement (PPI) input into research  
47 grant applications aimed at improving adherence to medication after stroke.<sup>17</sup>  
48  
49 24  
50  
51 25

52 26 The survey questions were developed through thematic analysis<sup>27</sup> of workshops field notes.  
53  
54  
55 27  
56  
57  
58  
59

1  
2  
3 1 A fourth workshop was conducted to gather feedback on the questionnaire using a PPI (Patient and  
4  
5 2 Public Involvement) exercise with 11 stroke survivors and 3 caregivers recruited through a local stroke group  
6  
7 3 (Different Strokes, East of England). Two stroke survivors from this group took part in subsequent 'think-  
8  
9 4 aloud' interviews, which involved talking out loud as they read the questionnaire, continually verbalising what  
10  
11 5 they were thinking.  
12  
13 6

### 7 **Postal survey**

16  
17 8 In respect to sample size, 400 returned questionnaires would allow good precision for prevalence estimates.  
18  
19 9 The 95% confidence intervals on various proportions with this sample size were calculated using the Wilson  
20  
21 10 score method (with continuity correction) and are as follows: 50% (45.00-55.00%), 25% (20.89%-29.60%),  
22  
23 11 5% (3.16-7.74%). With 600 questionnaires, the improvement in the precision of the estimates would be as  
24  
25 12 follows: 45.93%-54.07%, 21.62-28.70% and 3.46%-7.14% respectively.

26  
27 13 General practices in primary care in the East of England and London were approached through the Clinical  
28  
29 14 Research Network (CRN). CRN Eastern contacted 20 GP practices, of which 11 replied and took part in the  
30  
31 15 study. CRN North London contacted 140 GP East London practices by email (Tower Hamlets, Newham and  
32  
33 16 City & Hackney CCGs), of which only two replied and participated in the study. Five of the eight GP practices  
34  
35 17 contacted in North London (Barnet CCG) through a research coordinator took part in the study.

36  
37 18 Patients with stroke and their caregivers were sent the postal questionnaire according to the following criteria  
38  
39 19

#### 20 Inclusion Criteria

21 Patients:

22 All patients aged > 18 on the practice stroke register with documented history of stroke.

23 Caregivers:

- 24 • Anyone identified by the patient as having a role helping with medicine taking.

#### 25 Exclusion Criteria

- 26 • Patients who suffered a Transient ischaemic attack (TIA) but not a stroke.
- 27 • Palliative or end of life patients.

1  
2  
3  
4  
5  
6  
7  
8  
9  
10  
11  
12  
13  
14  
15  
16  
17  
18  
19  
20  
21  
22  
23  
24  
25  
26  
27  
28  
29  
30  
31  
32  
33  
34  
35  
36  
37  
38  
39  
40  
41  
42  
43  
44  
45  
46  
47  
48  
49  
50  
51  
52  
53  
54  
55  
56  
57  
58  
59  
60

- 1 • Patients receiving institutional long term care (receiving total care in residential homes or living in
- 2 nursing homes).
- 3 • Patients considered unsuitable to taking part in the study by their GP.

### 5 **Survey participant identification**

6 A list of prospective patients was compiled from the stroke register of each surgery by the practice  
7 staff. No restriction was placed on the recruitment of survivors who were dependent for ADLs or lacking  
8 capacity. The list was screened by a practice GP and anyone not meeting the inclusion criteria or who was  
9 considered unsuitable for the study was excluded. Reasons for unsuitability were not collected for practical  
10 reasons.

### 12 **Survey participant recruitment**

13 Eligible participants were sent a study survey pack by practice staff between September 2016 and  
14 February 2017. Study recruitment packs included two invitation letters, information sheets, questionnaires and  
15 postal version of Barthel Index<sup>28</sup>, one of which was for completion by the patient and the other by the  
16 caregiver. The Barthel Index provides a measure of functional independence and physical functioning and has  
17 been used in stroke research previously.<sup>29</sup> Patients with Barthel score 20 were categorised as independent for  
18 ADLs, those with score 15-19 moderately dependent for ADLs, and those with scores 0-14 severely  
19 dependent.<sup>30</sup> If receiving help with medications, the patient was asked to pass to their caregiver the invitation  
20 letter and information sheet and invite him/her to complete their copy of the questionnaire, providing answers  
21 on the patient's medicine taking. Family members, friends or paid caregivers of stroke survivors who were  
22 severely disabled and/or lacked mental capacity were invited to fill and return the caregivers' questionnaires  
23 only on behalf of patients. The information sheets stated that consent was implied by returning the completed  
24 questionnaire. Participants were asked to return completed questionnaires to the research centre in the  
25 FREEPOST envelopes provided. A second mail out of the study invitation pack was sent to all patients as a  
26 reminder, 2 weeks after the first one.

1  
2  
3 1  
4  
5 2  
6  
7  
8 3  
9  
10 4  
11 5  
12  
13 6  
14  
15 7  
16  
17 8  
18  
19 9  
20  
21 10  
22  
23 11  
24  
25 12  
26  
27 13  
28  
29 14  
30  
31 15  
32  
33 16  
34  
35 17  
36  
37 18  
38  
39 19  
40  
41 20  
42  
43 21  
44  
45 22  
46  
47 23  
48  
49 24  
50  
51 25  
52  
53 26  
54  
55 27  
56  
57  
58  
59  
60

## Ethical approval

This study has received ethical approval from Cambridge Central Research Ethics Committee (REC reference: 16/EE/0182) and from the Health Research Authority (IRAS project ID: 170931)

## Survey Analysis

Survey data entry was performed by Document Capture Company.<sup>31</sup> Individual patients' characteristics (age, gender, time since stroke, number of daily medicines) were collected from the questionnaires themselves.

Practice population, number of patients on stroke registers, deprivation score and ethnicity were taken from the National General Practice profiles (<https://fingertips.phe.org.uk/profile/general-practice>). The proportions of patients in each sociodemographic category, needing help taking medication, missing any medication in the previous 30 days, and reporting the need for more help taking medication, were estimated. When the survivor and caregiver questionnaires were both returned together, study data were collected from the patient's questionnaire only. The associations between 'Unmet needs' and age (< or ≥70 years), gender, total number of medicines taken, dependence for ADLs, years since stroke, and receiving help with medicines were investigated with individual logistic regression models (a different model per variable investigated), adjusted each and all of them for age and gender. Individual logistic regression models adjusted for age and gender were also used to estimate the association between 'Missed medicines in the previous 30 days' and age (< or > 70 years), gender, total number of medicines taken, dependent for ADLs, years since stroke, help with medicines and unmet needs (a different model adjusted for age and gender per variable investigated).

Sensitivity analysis was conducted to investigate if predictors of missing medication or unmet needs vary when the analysis was done on the whole dataset *versus* on questionnaires filled by patients only.

Chi squared tests were used to compare the responses on unmet needs and missing medication given by patients *versus* caregivers.

All statistical analysis has been conducted with Stata (version 14, StataCorp LP, College Station, TX, USA, 2013).

## Results

### 2 Questionnaire development

3 Taking medications emerged as an important issue in all three workshops: nearly half of patients  
4 stated that a family member or friend was supporting them with daily medicine routines especially in relation  
5 to prompting medicine taking. This was put down to effects of the stroke itself on memory retention rather  
6 than general memory problems that people without stroke also experience. They admitted missing doses due to  
7 forgetting. Only a small proportion of survivors were actually handling their own prescriptions and were  
8 relying on support from family and/or community services. In one workshop almost all survivors had Dosette  
9 medication boxes and agreed that taking medications out of safety bottles and blister packs was a problem due  
10 to physical disabilities.

11 Thematic analysis of workshop data revealed five main practical domains of support needed with  
12 medication taking: 1) Dealing with prescriptions and collection of medicines; 2) Getting medicines out of the  
13 box, blister packs or bottles; 3) Prompting 'It's time to take your medicine'; 4) Swallowing medicines; and 5)  
14 Checking whether medicines have been taken. The final study questionnaire (see Supplementary file 1)  
15 included questions relating to each of these five domains, one item related to adherence (missed medicine in  
16 the last 30 days) and an assessment of disabilities through completion of the validated postal version of the  
17 Barthel Index.<sup>28</sup> The questionnaire was adapted for caregivers (see Supplementary file 2).

### 18 Questionnaire finalisation

19 On the basis of the fourth workshop and two 'think-aloud' interviews, we reworded the survey  
20 questions (e.g. from 'Do you get help with' was changed into 'Is somebody helping you with') and used a  
21 scale response 'All the time', 'Often', 'Sometimes', 'Rarely', 'Never' for the first question of each of the five  
22 survey domains, which was originally conceived as a 'yes' or 'no' answer (see supplementary file for text of  
23 questions).

## Survey

### 2 **Practice characteristics**

3 18 GP practices agreed to take part in the study, of which just over 1/3 were in London (n=7). GP  
4 practices were relatively large with an average population of 11,904 patients (SD = 4010) and a low to  
5 moderate level of deprivation (Index of Multiple Deprivation<sup>32</sup> (IMD): Mean-7.05: SD-3.19). Out of 3066  
6 patients on the stroke registers, 1687 stroke patients (55%) were considered eligible for the study and received  
7 the postal questionnaire. The average response rate of East of England and London practices was 42% and  
8 27% respectively. The response rate varied between 16% and 53% across practices.

### 10 **Participant characteristics**

12 596 participants returned a completed questionnaire [549 (92.1 %) from patients, 47 (7.9 %) from  
13 caregivers showing a mean response rate of 35% (0.33-0.37). Participants were on average 72.7 yrs old.  
14 37.8% (n=210) of the sample were female, see table 1. There were a high proportion of white patients in the  
15 recruited practices (79%), which were on average 21% of mixed or ethnic minority background.  
16 Approximately 28% of study participants were completely independent for ADLs.

17 Participants getting any kind of help with medicines were on average 73.6 years old, two thirds were  
18 male with only 19% of this group completely independent for ADLs.

20 Patients with unmet needs were on average 69 years old, predominantly male (71%) and 56.86% were  
21 severely dependent for ADLs. Patients who missed medications were on average 70 years old, 64% were male  
22 and the majority (48%) were moderately dependent for ADLs.

24 Table 1 here

## 1 Support with daily medication taking

2

3 Overall, 55.5% (95% CI: 51.7-59.7) of the participants received help in at least one aspect of taking  
4 medication, in that they ticked one of the options from 'all the time' to 'rarely' on one or more of the five  
5 questions related to medicine taking. 11% (95% CI: 8.8-13.9) of patients reported experiencing unmet needs  
6 and needing more help with at least one of the aspects of taking medication, in that they ticked 'yes' to the  
7 question "do you feel you need more help", on one or more of the five questions related to medicine taking.  
8 The proportion of questionnaires reporting unmet needs filled in by caregivers, 19.6% (n=9), and by patients,  
9 10.7% (n=57), had no significant difference (p=0.068).

10 Among participants help was needed to some degree with prescriptions and collection of medicines  
11 (49.8 %), getting medicines out of the box or packet (27.9 %), reminding to take medicines (36.4 %),  
12 swallowing medicines (20.2 %) and checking that medicines have been taken (34.1 %).(see Table 2). Being  
13 reminded to take medicines, dealing with prescriptions and collection of medicines and getting medicines out  
14 of a pack or bottle were the most commonly reported areas of unmet needs. Almost two thirds of participants  
15 (65.3%) reported never missing medicines in the last 30 days. Out of the 34.7% of patients who said they  
16 missed taking medicine at any point in the previous 30 days, 23.9% said rarely, 9.3% sometimes, 0.8% often  
17 and 0.7% all the time. The proportion of questionnaires reporting missing medication at some point, filled in  
18 by caregivers, 27.7% (n=13), and by patients 35.3% (n=193), had no significant difference (p=0.292).

19 Table 2 here

## 20 Factors associated with unmet needs

21 Being on a higher total number of daily medications (OR: 1.2, (1.1-1.3), p<0.001), severe  
22 dependence for ADLs (OR: 11.6 (4.2-32.4) p<0.001) and receiving any kind of help (OR: 5.9, (2.7-11.6),  
23 p<0.001) in relation to taking medication was associated with experiencing unmet needs. Getting help with  
24 swallowing medicines (OR: 6.8, (3.8-12.0), p<0.001), getting medicines out of a box, blister packs or bottles  
25 (OR: 6.6, (3.6-11.8), p<0.001) showed the strongest associations with experiencing unmet needs (see table 3).

1  
2  
3 1 When the analyses were conducted with data from questionnaires filled by patients only, the variables  
4 significantly associated with unmet needs were the same, apart from years since stroke (Supplementary  
5 2  
6 3 Appendix 1).

7  
8  
9 4 Table 3 here  
10  
11 5  
12 6  
13 7

### 15 8 **Factors associated with missing medications**

16  
17  
18 9 Being older (age  $\geq 70$ ) was associated with a lower probability of missing medication (OR: 0.6  
19  
20 10 (0.4-0.9)  $p=0.006$ ). Being on a higher number of daily medicines (polypharmacy) (OR: 1.1 (1.0-1.1),  $p=0.008$ )  
21  
22 11 and getting any kind of help with medicine taking (OR: 2.1 (1.4-3.0)  $p<0.001$ ) was associated with higher  
23  
24 12 probability of missing medicines. The more unmet needs stroke survivors had with taking medication, the  
25  
26 13 more likely they were to miss their medicines (OR: 5.3 (3.0-9.4),  $p<0.001$ ). (see Table 4). When the analyses  
27  
28 14 were conducted with data from questionnaires filled by patients only, the variables significantly associated  
29  
30 15 with missing medication were the same (Supplementary Appendix 1).  
31  
32  
33 16  
34  
35 17  
36  
37  
38 18  
39  
40  
41 19  
42  
43  
44 20  
45  
46  
47 21  
48  
49  
50 22  
51  
52 23  
53  
54 24  
55  
56 25  
57  
58  
59  
60

38 18 Table 4 here  
39  
40  
41 19  
42  
43  
44 20  
45  
46  
47 21  
48  
49  
50 22  
51  
52 23  
53  
54 24  
55  
56 25  
57  
58  
59  
60

## 44 20 **Discussion**

### 47 21 **Summary of findings**

48  
49  
50 22 From workshops we identified 5 key issues that patients regarded as important with medication taking  
51  
52 23 after stroke. We converted these into a five item questionnaire that we distributed to people on stroke registers  
53  
54 24 in 18 general practices. We obtained a response rate of 35%. Among respondents, 56% of survivors in the  
55  
56 25 community were receiving help in some aspect of daily medication taking, 11% reported needing more help in  
57  
58  
59  
60



1  
2  
3 1 at least one domain of medicine taking and 34% missed taking their medicines at some point in the previous  
4  
5 2 30 days.

6  
7 3 A higher total number of daily medicines, being severely dependent for ADLs and receiving help with  
8  
9 4 medication were predictors of experiencing at least one unmet need in respect of medication taking. Stroke  
10  
11 5 survivors who were younger, taking a higher number of daily medicines and experiencing a greater number of  
12  
13 6 unmet needs were more likely to miss medications.

14  
15 7 This work identified issues from a population that includes patients severely affected by stroke, who are often  
16  
17 8 excluded from research.<sup>17</sup> Results presented here shed light on the effect of stroke related impairments on  
18  
19 9 practical domains and predictors of medicine taking, which are shown to have significant effects on overall  
20  
21 10 adherence.

22  
23 11

24  
25 12

### 26 27 13 **Strengths and limitations**

28  
29 14 A strength of this study is that the questionnaire was developed from patients' and caregivers' own  
30  
31 15 views gathered through workshops. Although not recruited through purposive sampling, workshop participants  
32  
33 16 suffered from a range of stroke related impairments, as highlighted by the reported use of Dossette boxes,  
34  
35 17 dependence on others for aspects of medicine taking like prompting medication times, and dependence for  
36  
37 18 ADLs such as collecting prescriptions and taking tablets out of boxes. In the postal survey, the inclusion of  
38  
39 19 stroke survivors regardless of level of dependence for ADLs permitted investigating a population who are  
40  
41 20 understudied,<sup>17</sup> yet may have significant unmet needs that can affect their adherence to medications. This  
42  
43 21 investigation highlights caregivers' role in managing medicines in survivors dependent for ADLs.

44  
45 22 However, study limitations should also be considered. The response rate across recruited GP practices  
46  
47 23 was low and harder to reach stroke survivors may have been missed. Poor response rate is a source of bias that  
48  
49 24 might affect our estimates.

50  
51 25 Interestingly, considering the average age at stroke in England (i.e. 74 for men and 80 years for women<sup>19</sup>), our  
52  
53 26 participants' population was slightly younger (73 years), perhaps reflecting the fact that patients receiving  
54  
55 27 institutional long term care were excluded from the study or that older people found harder taking part in a  
56  
57 28 postal survey. Through the Barthel score, we did not assess cognition directly, although low cognitive function

1  
2  
3 1 is associated with poor adherence.<sup>33</sup> As the Barthel focuses on physical disability it is not known to what  
4  
5 2 extent study participants were cognitively impaired or suffered from communication difficulties like aphasia.  
6  
7 3 In addition, dependency for ADLs could have been caused by existing co-morbidities other than stroke. We  
8  
9 4 did not collect information on the use of blister packaged medication or devices to aid compliance, which  
10  
11 5 could have influenced medication taking practices. Finally this study examined all medicine taking and did not  
12  
13 6 differentiate between stroke secondary prevention medications and other drug categories.  
14  
15 7

### 8 **Comparisons with existing research**

9  
10  
11  
12  
13  
14  
15  
16  
17  
18  
19 9 To our knowledge this is the first study that shows that more than half of all stroke survivors get help  
20  
21 10 with some aspect of medicine taking and that those receiving help are more likely to have unmet needs. This  
22  
23 11 provides some insight in to why adherence to medication in stroke survivors may be poor.<sup>34</sup>

24  
25 12 Moreover, the greater the number of medicines, the more likely stroke survivors were to miss  
26  
27 13 medications. Addressing pill burden by simplifying drug regimens may be an important focus for future  
28  
29 14 interventions. Indeed the polypill approach to medication taking has been shown to reduce cardiovascular as  
30  
31 15 well as total pill burden in a primary care setting.<sup>35</sup> Simpler dosing regimens, are known to be associated with  
32  
33 16 better medication adherence<sup>36</sup> while fewer medicines has been shown to be an independent predictor of long  
34  
35 17 term medication persistence among stroke survivors.<sup>37 38</sup> A recent trial incorporating a fixed-dose combination  
36  
37 18 polypill approach to taking cardiovascular medicine demonstrated better adherence among patients receiving a  
38  
39 19 single pill.<sup>39</sup>

40  
41 20 Receiving help with prescriptions and collecting medicines was identified as the area where most help  
42  
43 21 was received (49.7% of respondents). Stroke survivors who are dependent for activities of daily living may  
44  
45 22 face considerable practical challenges accessing health care resources at the pharmacy and the GP practice. A  
46  
47 23 recent study in the USA found that around 2/3 of caregivers were involved in at least 1 medication  
48  
49 24 management activity of elderly patients and that high involvement in Instrumental Activities of Daily Living  
50  
51 25 (IADLs) was associated with the caregiver providing the patient with assistance in ordering medicines.<sup>40</sup>  
52  
53 26 Filling prescriptions is also known to be an important factor influencing medication adherence.<sup>41 42</sup> Indeed  
54  
55 27 caregivers can play a significant role in ensuring appropriate medication taking. A recent interview study  
56  
57 28 exploring potential barriers and facilitators of medication adherence in stroke identified the central role of the

1  
2  
3 1 caregiver in medication adherence.<sup>43</sup> Our evaluation of an online stroke forum also confirmed the important  
4  
5 2 role of the caregiver in facilitating medication adherence.<sup>14</sup> Monitoring prescription collections, liaising with  
6  
7 3 the GP and pharmacy, increasing the time between prescriptions or arranging medication deliveries, may help  
8  
9 4 to address prescription needs.

10  
11 5         Around 11% of stroke survivors reported unmet medication needs. We found that stroke survivors  
12  
13 6 severely dependent for ADLs and receiving help with medicines were more likely to report unmet needs,  
14  
15 7 which is in line with a recent study investigating stroke/TIA survivors in Australia, where greater functional  
16  
17 8 ability was associated with fewer unmet needs, including those related to secondary prevention.<sup>44</sup> In previous  
18  
19 9 research on unmet needs among stroke survivors, a 44 item survey study by McKeivitt and colleagues (2011)  
20  
21 10 reported that 49% of stroke survivors had at least one unmet need<sup>25</sup>, while in a study of Australian survivors  
22  
23 11 who completed a 58 item survey, the percentage was 84%.<sup>24</sup> Both these studies however examined unmet  
24  
25 12 needs over a variety of domains including health, work, leisure and everyday living, social support and  
26  
27 13 finances, whereas our study focused on medication needs only.

28  
29 14         Getting help to take medicines out of a box, packet or bottle was the area where the greatest proportion  
30  
31 15 of stroke survivors needed help all of the time. We previously found that the use of pill boxes and blister  
32  
33 16 packed medication to be both a facilitator<sup>35</sup> and a barrier<sup>14</sup> to adherence among stroke survivors<sup>15</sup>, while  
34  
35 17 interventions using blister packaging and pill boxes have been found to be associated with improved  
36  
37 18 adherence.<sup>45</sup> Although electronic medication devices were considered potentially effective in improving  
38  
39 19 medication taking behaviour among patients with cognitive impairments, success in using such devices was  
40  
41 20 dependent on the patient having a good level of dexterity, while removing the medication from these devices  
42  
43 21 was also found to be challenging.<sup>46 47 48</sup>

44  
45 22         The need for further support in this domain, as reported in the current study, suggests that handling  
46  
47 23 medications remains problematic for stroke survivors.

48  
49 24         An interesting finding from this survey study is that stroke survivors who missed medicines were  
50  
51 25 younger. This is consistent with other research on adherence in stroke that found that younger age was  
52  
53 26 predictive of poor adherence<sup>49</sup>, and has also been described in patients taking medication for cardiovascular  
54  
55 27 disease.<sup>50</sup> The finding in the present study contrasts with the view that older patients are more likely to face  
56  
57 28 difficulties taking medication<sup>51 52</sup> which is frequently attributed to higher number of pre-existing comorbidities

1  
2  
3 1 resulting in polypharmacy and increased complexity of medication taking regimens. The fact that older  
4  
5 2 patients may be less likely miss medicine might be down to the support they receive from caregivers. Our  
6  
7 3 findings suggests that support needed with medications may be overlooked in younger stroke survivors.<sup>53</sup>

8  
9 4 In this study a significant proportion of patients admitted missing medications occasionally. There is  
10  
11 5 evidence that improving adherence by one anti-hypertensive pill/week for a once-a-day regimen reduces the  
12  
13 6 hazard of stroke by 8–9 % and death by 7 %.<sup>54</sup> Each incremental 25% increase in proportion of days covered  
14  
15 7 with statin medications is associated with a 0.10 mmol/L reduction in LDL-C cholesterol.<sup>55 56</sup> Non-adherence  
16  
17 8 to cardiovascular medications is associated with increased risk of morbidity and mortality.<sup>57</sup>

### 10 **Implications for clinical practice**

11  
12 A significant proportion of patients, particularly those who take large numbers of tablets, are disabled  
13  
14 or receive help to take medication, have unmet needs and miss their tablets, which can increase risk of  
15  
16 recurrent cardiovascular events. These particularly vulnerable groups of patients might benefit from focused  
17  
18 clinical attention. Through understanding the needs of survivors and caregivers in different aspects of daily  
19  
20 medication taking, we can help direct future resources to the areas of greatest need. For example, further  
21  
22 exploration of medication packaging is warranted to understand the difficulties stroke survivors face handling  
23  
24 medicines. Polypharmacy remains a difficulty for older patients. Therefore, exploring the use of combination  
25  
26 pills and further efforts to reduce the burden of multiple medications among stroke survivors is warranted.

27  
28 The questionnaire we have developed could be used to understand the challenges around medication  
29  
30 faced by other patient groups. Unmet medication needs among UK stroke survivors have not been previously  
31  
32 explored in the context of activities both survivors and caregivers consider important for taking medicines.  
33  
34 Through understanding the extent of unmet needs as well as the areas in which these are greatest, strategies  
35  
36 can be developed which address poor medication taking practices and therefore improve medication  
37  
38 adherence.  
39  
40  
41  
42  
43  
44  
45  
46  
47  
48  
49  
50  
51  
52  
53  
54  
55  
56  
57  
58  
59  
60

1  
2  
3 **1 Future research**

4  
5 2  
6  
7 3 Novel interventions focussing on the practicalities of taking medicines and aimed at improving stroke  
8  
9 4 survivors' adherence to treatment are needed. The findings reported here may inform the development of such  
10  
11 5 interventions. Advances in technology have the potential to facilitate delivery of such interventions, e.g.  
12  
13 6 electronic devices prompting medication taking times.<sup>58 59</sup> Efforts to improve medication taking among  
14  
15 7 survivors of stroke using technology are already underway and have shown promise.<sup>60</sup>

16  
17 8 Acknowledgements

18  
19 9 The authors wish to thank all the stroke survivors and caregivers who participated in this study.

20  
21 10 Competing interests

22  
23  
24 11 None declared

25  
26  
27 12 Data sharing statement

28  
29 13 No additional data are available

30  
31  
32 14 Author/s contribution

33  
34 15 ADS is the Chief Investigator, contributed to the study design, data analysis and commented on the  
35  
36 16 manuscript. JJ contributed to the study design, data collection, data analysis and prepared the manuscript for  
37  
38 17 submission. JM is a co-investigator on the study, wrote and commented on the manuscript. SS is a co-  
39  
40 18 investigator on the study, wrote and commented on the manuscript. LA contributed to the data analysis and  
41  
42 19 commented on the manuscript. GDiT contributed to the data analysis and commented on the manuscript. All  
43  
44 20 authors agreed on the final draft of the submitted manuscript.

45  
46  
47 21

48  
49  
50 22

51  
52  
53 23

54  
55  
56

57  
58

59

60

## References

1. Young J, Forster A. Review of stroke rehabilitation. *BMJ* 2007;334(7584):86-90. doi: 10.1136/bmj.39059.456794.68
2. Miller EL, Murray L, Richards L, et al. Comprehensive overview of nursing and interdisciplinary rehabilitation care of the stroke patient: a scientific statement from the American Heart Association. *Stroke* 2010 (Oct);41(10):2402-48. doi: 10.1161/STR.0b013e3181e7512b
3. Feigin VL, Barker-Collo S, Parag V, et al. Auckland Stroke Outcomes Study: Part 1: Gender, stroke types, ethnicity, and functional outcomes 5 years poststroke. *Neurology* 2010;75(18):1597-607. doi: 10.1212/WNL.0b013e3181fb44b3
4. Marek KD AL. Medication Management of the Community-Dwelling Older Adult. In: RG H, ed. An Evidence-Based Handbook for Nurses: Agency for Healthcare Research and Quality (US). Rockville, MD2008.
5. Lewis A. Non-compliance: A \$100 billion problem. . *The Remington Report* 1997;5:14-5.
6. National Audit Office. Progress in improving stroke care. In: Office NA, ed. London: Department of Health, 2010.
7. Park JH, Park JH, Lee SY, et al. Disparities in Antihypertensive Medication Adherence in Persons With Disabilities and Without Disabilities: Results of a Korean Population-Based Study. *Archives of Physical Medicine and Rehabilitation* 2008;89(8):1460-67. doi: <http://dx.doi.org/10.1016/j.apmr.2007.12.045>
8. Stilley CS, Bender CM, Dunbar-Jacob J, et al. The Impact of Cognitive Function on Medication Management: Three Studies. *Health psychology : official journal of the Division of Health Psychology, American Psychological Association* 2010;29(1):50-55. doi: 10.1037/a0016940
9. Smith D, Lovell J, Weller C, et al. A systematic review of medication non-adherence in persons with dementia or cognitive impairment. *PLoS ONE* 2017;12(2):e0170651. doi: 10.1371/journal.pone.0170651
10. Kronish IM, Ye S. Adherence to Cardiovascular Medications: Lessons Learned and Future Directions. *Progress in cardiovascular diseases* 2013;55(6):590-600. doi: 10.1016/j.pcad.2013.02.001

- 1  
2  
3 11. Gordon K, Smith F, Dhillon S. Effective chronic disease management: Patients' perspectives on  
4 medication-related problems. *Patient Education and Counseling* 2007;65(3):407-15. doi:  
5 2  
6 <http://dx.doi.org/10.1016/j.pec.2006.09.012>  
7 3  
8  
9 12. Xu J, Zhao X, Wang Y, et al. Impact of a Better Persistence with Antihypertensive Agents on Ischemic  
10 Stroke Outcomes for Secondary Prevention. *PLoS ONE* 2013;8(6):e65233. doi:  
11 5  
12 10.1371/journal.pone.0065233  
13 6  
14 13. Colivicchi F, Bassi A, Santini M, et al. Discontinuation of Statin Therapy and Clinical Outcome After  
15 7 Ischemic Stroke. *Stroke* 2007;38(10):2652-57. doi: 10.1161/strokeaha.107.487017  
16 8  
17 14. Jamison J, Sutton S, Mant J, et al. Barriers and facilitators to adherence to secondary stroke prevention  
18 9 medications after stroke: Analysis of survivors and caregivers views from an online stroke forum.  
19 10  
20 *BMJ Open* 2017;7 (e016814)  
21 11  
22 15. Jamison J, Graffy J, Mullis R, et al. Barriers to medication adherence for the secondary prevention of  
23 12 stroke: a qualitative interview study in primary care. *The British Journal of General Practice*  
24 13  
25 2016;66(649):e568-e76. doi: 10.3399/bjgp16X685609  
26 14  
27 16. Souter C, Kinnear A, Kinnear M, et al. Optimisation of secondary prevention of stroke: a qualitative study  
28 15 of stroke patients' beliefs, concerns and difficulties with their medicines. *International Journal of*  
29 16  
30 *Pharmacy Practice* 2014;22(6):424-32. doi: 10.1111/ijpp.12104  
31 17  
32 17. De Simoni A, Mant J, Sutton S. Adherence to medication in stroke survivors dependent on caregivers.  
33 18  
34 *British Journal of General Practice* 2015;65(640):e789.  
35 19  
36 18. De Simoni A, Hardeman W, Mant J, et al. Trials to Improve Blood Pressure Through Adherence to  
37 20 Antihypertensives in Stroke/TIA: Systematic Review and Meta-Analysis. *Journal of the American*  
38 21  
39 *Heart Association* 2013 (Aug 20);2(4):e000251. doi: 10.1161/jaha.113.000251  
40 22  
41 19. Royal College of Physicians. Sentinel Stroke National Audit Programme (SSNAP). National clinical audit  
42 23 annual results portfolio March 2015-April 2016. [Available from: <http://bit.ly/1M5R3Op>  
43 24  
44 20. Munger MA, Van Tassell BW, LaFleur J. Medication Nonadherence: An Unrecognized Cardiovascular  
45 25  
46 Risk Factor. *Medscape General Medicine* 2007;9(3):58-58.  
47 26  
48 21. Brown MT, Bussell JK. Medication Adherence: WHO Cares? *Mayo Clinic proceedings* 2011;86(4):304-  
49 27  
50 14. doi: 10.4065/mcp.2010.0575  
51 28  
52  
53  
54  
55  
56  
57  
58  
59  
60



- 1  
2  
3 1 22. Wolff JL, Spillman B. Older Adults Receiving Assistance With Physician Visits and Prescribed  
4 Medications and Their Family Caregivers: Prevalence, Characteristics, and Hours of Care. *The*  
5 2  
6 3  
7 3  
8  
9 4 23. Ownby RL, Hertzog C, Crocco E, et al. Factors related to medication adherence in memory disorder clinic  
10 patients. *Aging & mental health* 2006;10(4):378-85. doi: 10.1080/13607860500410011  
11 5  
12  
13 6 24. Andrew NE, Kilkenny M, Naylor R, et al. Understanding Long-Term Unmet Needs in Australian  
14 Survivors of Stroke. *International Journal of Stroke* 2014;9(SA100):106-12. doi:  
15 7  
16 8  
17 8  
18 9 25. McKeivitt C, Fudge N, Redfern J, et al. Self-Reported Long-Term Needs After Stroke. *Stroke*  
19  
20 10  
21 10  
22 26. De Simoni A, Kellar I, Sutton S, et al. Developing a pharmacist intervention to improve adherence to  
23 11  
24 12  
25 12  
26 13 27. Braun V, Clarke V. Using thematic analysis in psychology. *Qualitative Research in Psychology*  
27 13  
28 14  
29 14  
30 15 28. Gompertz P, Pound P, Ebrahim S. A postal version of the Barthel Index. *Clinical Rehabilitation*  
31 15  
32 16  
33 16  
34 17 29. Quinn TJ, Langhorne P, Stott DJ. Barthel Index for Stroke Trials. *Development, Properties, and*  
35 17  
36 18  
37 18  
38 19 30. Wolfe CD, Taub NA, Woodrow EJ, et al. Assessment of scales of disability and handicap for stroke  
39 19  
40 20  
41 20  
42 21 31. Document Capture Company [Available from: [20](http://www.documentcapture.co.uk/data-collection-<br/>43 21<br/>44 22<br/>45 22<br/>46 23 32. Smith T, Noble, M, Noble S, et al. The English Indices of Deprivation 2015 Research report, 2015.<br/>47 23<br/>48 24 33. Hayes TL, Larimer N, Adami A, et al. Medication Adherence in Healthy Elders. <i>Journal of Aging and</i><br/>49 24<br/>50 25<br/>51 25<br/>52 26 34. Chowdhury R, Khan H, Heydon E, et al. Adherence to cardiovascular therapy: a meta-analysis of<br/>53 26<br/>54 27<br/>55 27<br/>56 28<br/>57 28<br/>58<br/>59<br/>60</p></div><div data-bbox=)



- 1  
2  
3 1 35. Truelove M, Patel A, Bompont S, et al. The Effect of a Cardiovascular Polypill Strategy on Pill Burden.  
4  
5 2 *Cardiovascular Therapeutics* 2015;33(6):347-52. doi: 10.1111/1755-5922.12151  
6  
7 3 36. Claxton AJ, Cramer, J., Pierce, C. A Systematic Review of the Associations Between Dose Regimens and  
8  
9 4 Medication Compliance *Clinical therapeutics* 2001;23(8):1296-310.  
10  
11 5 37. Bushnell CD, Olson DM, Zhao X, et al. Secondary preventive medication persistence and adherence 1 year  
12  
13 6 after stroke. *Neurology* 2011;77(12):1182-90. doi: 10.1212/WNL.0b013e31822f0423 [published  
14  
15 7 Online First: 2011/09/09]  
16  
17 8 38. Chapman RH, Benner JS, Petrilla AA, et al. Predictors of adherence with antihypertensive and lipid-  
18  
19 9 lowering therapy. *Archives of Internal Medicine* 2005;165(10):1147-52. doi:  
20  
21 10 10.1001/archinte.165.10.1147  
22  
23 11 39. Thom S, Poulter N, Field J, et al. Effects of a fixed-dose combination strategy on adherence and risk  
24  
25 12 factors in patients with or at high risk of CVD: the UMPIRE randomized clinical trial. *JAMA : the*  
26  
27 13 *journal of the American Medical Association* 2013;310(9):918-29. doi: 10.1001/jama.2013.277064  
28  
29 14 40. Noureldin M, Plake KS. Correlates of caregivers' involvement in the management of older adults'  
30  
31 15 medications. *Research in Social and Administrative Pharmacy* 2017;13(4):840-48. doi:  
32  
33 16 <https://doi.org/10.1016/j.sapharm.2016.09.009>  
34  
35 17 41. Andersson K, Melander A, Svensson C, et al. Repeat prescriptions: refill adherence in relation to patient  
36  
37 18 and prescriber characteristics, reimbursement level and type of medication. *European Journal of*  
38  
39 19 *Public Health* 2005;15(6):621-26. doi: 10.1093/eurpub/cki053  
40  
41 20 42. Vlasnik JJ, Aliotta SL, DeLor B. Medication adherence: Factors influencing compliance with prescribed  
42  
43 21 medication plans. *The Case Manager* 2005;16(2):47-51. doi:  
44  
45 22 <http://dx.doi.org/10.1016/j.casemgr.2005.01.009>  
46  
47 23 43. Bauler S, Jacquin-Courtois S, Haesebaert J, et al. Barriers and Facilitators for Medication Adherence in  
48  
49 24 Stroke Patients: A Qualitative Study Conducted in French Neurological Rehabilitation Units.  
50  
51 25 *European Neurology* 2014;72(5-6):262-70.  
52  
53 26 44. Olaiya MT, Cadilhac DA, Kim J, et al. Long-term unmet needs and associated factors in stroke or TIA  
54  
55 27 survivors: An observational study. *Neurology* 2017 (Jul 4);89(1):68-75. doi:  
56  
57 28 10.1212/wnl.0000000000004063

- 1  
2  
3 1 45. Conn VS, Ruppap TM, Chan KC, et al. Packaging interventions to increase medication adherence:  
4  
5 2 systematic review and meta-analysis. *Current Medical Research and Opinion* 2015;31(1):145-60. doi:  
6  
7 3 10.1185/03007995.2014.978939  
8  
9 4 46. Hall J, Bond C, Kinnear M, et al. Views of patients and professionals about electronic multicompartiment  
10  
11 5 medication devices: a qualitative study. *BMJ Open* 2016;6:e012915. doi: 10.1136/bmjopen-2016-  
12  
13 6 012915  
14  
15 7 47. Beckman AGK, Parker MG, Thorslund M. Can elderly people take their medicine? *Patient Education and*  
16  
17 8 *Counseling* 2005;59(2):186-91. doi: <http://dx.doi.org/10.1016/j.pec.2004.11.005>  
18  
19 9 48. Notenboom K, Beers E, van Riet-Nales DA, et al. Practical Problems with Medication Use that Older  
20  
21 10 People Experience: A Qualitative Study. *Journal of the American Geriatrics Society*  
22  
23 11 2014;62(12):2339-44. doi: 10.1111/jgs.13126  
24  
25 12 49. O'Carroll R, Whittaker J, Hamilton B, et al. Predictors of adherence to secondary preventive medication in  
26  
27 13 stroke patients. *Ann Behav Med* 2011;41(3):383-90. doi: 10.1007/s12160-010-9257-6 [published  
28  
29 14 Online First: 2011/01/05]  
30  
31 15 50. Crowley MJ, Zullig LL, Shah BR, et al. Medication Non-Adherence After Myocardial Infarction: An  
32  
33 16 Exploration of Modifying Factors. *Journal of General Internal Medicine* 2015;30(1):83-90. doi:  
34  
35 17 10.1007/s11606-014-3072-x  
36  
37 18 51. Hughes CM. Medication Non-Adherence in the Elderly. *Drugs & Aging* 2004;21(12):793-811. doi:  
38  
39 19 10.2165/00002512-200421120-00004  
40  
41 20 52. De Schryver EL, van Gijn J, Kappelle LJ, et al. Non-adherence to aspirin or oral anticoagulants in  
42  
43 21 secondary prevention after ischaemic stroke. *J Neurol* 2005;252(11):1316-21. doi: 10.1007/s00415-  
44  
45 22 005-0858-0 [published Online First: 2005/05/04]  
46  
47 23 53. Kersten P, Low JTS, Ashburn A, et al. The unmet needs of young people who have had a stroke: results of  
48  
49 24 a national UK survey. *Disability and Rehabilitation* 2002;24(16):860-66. doi:  
50  
51 25 10.1080/09638280210142167  
52  
53 26 54. Bailey JE, Wan JY, Tang J, et al. Antihypertensive medication adherence, ambulatory visits, and risk of  
54  
55 27 stroke and death. *J Gen Intern Med* 2010;25(6):495-503. doi: 10.1007/s11606-009-1240-1 [published  
56  
57 28 Online First: 2010/02/19]

- 1  
2  
3 1 55. Amarenco P, Labreuche J. Lipid management in the prevention of stroke: review and updated meta-  
4  
5 2 analysis of statins for stroke prevention. *The Lancet Neurology* 2009;8(5):453-63. doi: 10.1016/s1474-  
6  
7 3 4422(09)70058-4 [published Online First: 2009/04/21]  
8  
9 4 56. Ho PM, Rumsfeld JS, Masoudi FA, et al. Effect of medication nonadherence on hospitalization and  
10  
11 5 mortality among patients with diabetes mellitus. *Arch Intern Med* 2006;166(17):1836-41. doi:  
12  
13 6 10.1001/archinte.166.17.1836 [published Online First: 2006/09/27]  
14  
15 7 57. Rasmussen JN, Chong A, Alter DA. Relationship between adherence to evidence-based pharmacotherapy  
16  
17 8 and long-term mortality after acute myocardial infarction. *Jama* 2007;297(2):177-86. doi:  
18  
19 9 10.1001/jama.297.2.177 [published Online First: 2007/01/11]  
20  
21 10 58. Tao D, Xie L, Wang T, et al. A meta-analysis of the use of electronic reminders for patient adherence to  
22  
23 11 medication in chronic disease care. *Journal of Telemedicine and Telecare* 2015;21(1):3-13. doi:  
24  
25 12 doi:10.1177/1357633X14541041  
26  
27 13 59. Thakkar J, Kurup R, Laba T, et al. Mobile telephone text messaging for medication adherence in chronic  
28  
29 14 disease: A meta-analysis. *JAMA Internal Medicine* 2016;176(3):340-49. doi:  
30  
31 15 10.1001/jamainternmed.2015.7667  
32  
33 16 60. Kamal AK, Shaikh Q, Pasha O, et al. A randomized controlled behavioral intervention trial to improve  
34  
35 17 medication adherence in adult stroke patients with prescription tailored Short Messaging Service  
36  
37 18 (SMS)-SMS4Stroke study. *BMC Neurology* 2015;15(1):212. doi: 10.1186/s12883-015-0471-5  
38  
39  
40  
41  
42  
43  
44  
45  
46  
47  
48  
49  
50  
51  
52  
53  
54  
55  
56  
57  
58  
59  
60

|                                          | All patients |      |      |      | Patients who receive any kind of help |      |      |      | Patients with unmet needs |      |      |     | Patients who miss medication |      |      |      |
|------------------------------------------|--------------|------|------|------|---------------------------------------|------|------|------|---------------------------|------|------|-----|------------------------------|------|------|------|
|                                          | N            | %    | Mean | SD   | N                                     | %    | Mean | SD   | N                         | %    | Mean | SD  | N                            | %    | Mean | SD   |
| Age                                      | 588          |      | 72.7 | 11.6 | 331                                   |      | 73.6 | 12.2 | 64                        |      | 68.8 |     | 203                          |      | 70.5 | 13.0 |
| Female                                   | 210          | 37.8 |      |      | 112                                   | 36.2 |      |      | 18                        | 28.6 |      |     | 68                           | 35.6 |      |      |
| Male                                     | 346          | 67.2 |      |      | 197                                   | 63.2 |      |      | 45                        | 71.4 |      |     | 123                          | 64.4 |      |      |
| Time since stroke                        | 535          |      | 7.7  | 7.6  | 295                                   |      | 7.97 | 8.5  | 61                        |      | 9.3  | 9.2 | 186                          |      | 7.7  | 8.5  |
| N of daily medicines                     | 557          |      | 6.4  | 4    | 312                                   |      | 7.3  | 4.5  | 59                        |      | 9.7  | 7.1 | 190                          |      | 6.9  | 4.1  |
| Independent for ADLs (BI=20)             | 139          | 28.3 |      |      | 53                                    | 18.9 |      |      | 5                         | 9.8  |      |     | 45                           | 25.7 |      |      |
| Moderately dependent for ADLs (BI=15-19) | 231          | 47.1 |      |      | 130                                   | 46.4 |      |      | 17                        | 33.3 |      |     | 84                           | 48.0 |      |      |
| Severely dependent for ADLs (BI=0-14)    | 121          | 24.6 |      |      | 97                                    | 34.6 |      |      | 29                        | 56.9 |      |     | 46                           | 26.3 |      |      |

Table 1. Characteristics of participants who took part in the survey study (*mean scores reported unless otherwise stated*). N represents the number of participants who completed the survey in respect to the different variables. BI: Barthel Index.

|                                                                                                                  | <b>N</b> | <b>All the Time<br/>N (%)</b> | <b>Often<br/>N (%)</b> | <b>Sometimes<br/>N (%)</b> | <b>Rarely<br/>N (%)</b> | <b>Never<br/>N (%)</b> | <b>Yes<br/>N (%)</b> | <b>No<br/>N (%)</b> |
|------------------------------------------------------------------------------------------------------------------|----------|-------------------------------|------------------------|----------------------------|-------------------------|------------------------|----------------------|---------------------|
| Question 1<br>Is somebody helping with prescriptions and collection of your medicines?                           | 583      | 186<br>(31.9)                 | 19<br>(3.3)            | 40<br>(6.9)                | 45<br>(7.7)             | 293<br>(50.2)          |                      |                     |
| Question 1a<br>Do you feel you need more help with prescriptions and collection of your medicines?               | 551      |                               |                        |                            |                         |                        | 33<br>(6.0)          | 518<br>(94.0)       |
| Question 2<br>Is somebody helping you getting the medicines out of the box, bottle or blister pack?              | 578      | 85<br>(14.7)                  | 15<br>(2.6)            | 31<br>(5.4)                | 30<br>(5.2)             | 417<br>(72.1)          |                      |                     |
| Question 2a<br>Do you feel you need more help with getting the medicines out of the box, bottle or blister pack? | 553      |                               |                        |                            |                         |                        | 33<br>(6.0)          | 520<br>(94.0)       |
| Question 3<br>Is somebody helping with reminding you when is the time to take your medicine?                     | 577      | 78<br>(13.6)                  | 22<br>(3.8)            | 59<br>(10.2)               | 51<br>(8.8)             | 367<br>(63.6)          |                      |                     |
| Question 3a<br>Do you feel you need more help with reminding when is the time to take your medicine?             | 564      |                               |                        |                            |                         |                        | 35<br>(6.2)          | 529<br>(93.8)       |
| Question 4<br>Is somebody helping you with swallowing your medicine?                                             | 579      | 56<br>(9.7)                   | 11<br>(1.9)            | 29<br>(5.0)                | 21<br>(3.6)             | 462<br>(79.8)          |                      |                     |
| Question 4a<br>Do you feel you need more help with swallowing your medicine?                                     | 560      |                               |                        |                            |                         |                        | 9<br>(1.6)           | 551<br>(98.4)       |
| Question 5<br>Is somebody helping you with checking that you have taken your medicines?                          | 576      | 76<br>(13.2)                  | 23<br>(4.0)            | 58<br>(10.0)               | 40<br>(6.9)             | 379<br>(65.9)          |                      |                     |
| Question 5 a<br>Do you feel you need more help with checking that you have taken your medicine?                  | 558      |                               |                        |                            |                         |                        | 20<br>(3.6)          | 538<br>(96.4)       |
| Thinking of the last 30 days, how often did you miss taking your regular medicines?                              | 594      | 4<br>(0.7)                    | 5<br>(0.8)             | 55<br>(9.3)                | 142<br>(23.9)           | 388<br>(65.3)          |                      |                     |

Table 2. Results summarising participants' responses to the survey questions.

| Variable                                                                  | Univariable analysis |                                | Multivariable analysis |                                |
|---------------------------------------------------------------------------|----------------------|--------------------------------|------------------------|--------------------------------|
|                                                                           | N                    | Odds ratio (95% CI)<br>p value | N                      | Odds ratio (95% CI)<br>p value |
| Age ≥70                                                                   | 581                  | 0.6 (0.4-1.1) p=0.084          | 544                    | 0.7 (0.4-1.2) p=0.180          |
| Gender (female)                                                           | 544                  | 0.7 (0.4-1.2) p=0.137          | 544                    | 0.7 (0.4-1.2) p=0.147          |
| Number of different medicines                                             | 542                  | 1.2 (1.1-1.3) p<0.001          | 509                    | 1.2 (1.1-1.3) p<0.001          |
| Moderate Dependence for ADLs (BI: 15-19)                                  | 479                  | 2.2 (0.8-6.1) p=0.135          | 447                    | 2.7 (1.0-7.5) p=0.068          |
| Severe Dependence for ADLs (BI: 0-14)                                     | 479                  | 8.5 (3.2-22.8) p<0.001         | 447                    | 11.6 (4.2-32.4) p<0.001        |
| Years since stroke                                                        | 522                  | 1.0 (1.0-1.1) p=0.078          | 490                    | 1.0 (1.0-1.1) p=0.160          |
| Getting help with prescriptions and collection of medication              | 568                  | 4.7 (2.5-8.8) p<0.001          | 533                    | 4.6 (2.4-8.7) p<0.001          |
| Getting help with taking medicines out of the box, bottle or blister pack | 563                  | 6.7 (3.8-11.8) p<0.001         | 527                    | 6.6 (3.6-11.8) p<0.001         |
| Getting help with reminding you when is the time to take your medicine?   | 562                  | 4.7 (2.7-8.2) p<0.001          | 526                    | 4.3 (2.4-7.6) p<0.001          |
| Getting help to swallow the medication                                    | 565                  | 6.7 (3.9-11.6) p<0.001         | 528                    | 6.8 (3.8-12.0) p<0.001         |
| Getting help by checking that you have taken your medicines               | 562                  | 4.9 (2.8-8.6) p<0.001          | 526                    | 5.9 (3.1-10.1) p<0.001         |
| Getting any kind of help                                                  | 574                  | 5.9 (2.8-12.1) p<0.001         | 537                    | 5.9 (2.7-11.6) p<0.001         |

Table 3. Results of the multivariable analysis showing the variables associated with unmet needs.

N: number of observations; ADLs: Activities of daily living; BI: Barthel Index.

| Variable                                                                  | Univariable analysis |                             | Multivariable analysis |                             |
|---------------------------------------------------------------------------|----------------------|-----------------------------|------------------------|-----------------------------|
|                                                                           | N                    | Odds Ratio (95% CI) p value | N                      | Odds Ratio (95% CI) p value |
| Age ≥70                                                                   | 594                  | 0.6 (0.4-0.8) p=0.003       | 555                    | 0.6 (0.4-0.9) p=0.006       |
| Gender (female)                                                           | 555                  | 0.9 (0.6-1.2) p=0.401       | 555                    | 0.9 (0.6-1.3) p=0.498       |
| Number of different medicines                                             | 555                  | 1.0 (1.0-1.1) p=0.040       | 520                    | 1.1 (1.0-1.1) p=0.008       |
| Moderate Dependence for ADLs (BI: 15-19)                                  | 490                  | 1.2 (0.8-1.8) p=0.468       | 456                    | 1.3 (0.8-2.0) p=0.343       |
| Severe dependence for ADLs (BI 0-14)                                      | 490                  | 1.3 (0.8-2.1) p=0.342       | 456                    | 1.4 (0.8-2.4) p=0.239       |
| Years since stroke                                                        | 533                  | 1.0 (0.9-1.0) p=0.950       | 499                    | 1.0 (0.9-1.0) p=0.971       |
| Getting help with prescriptions and collection of medication              | 581                  | 2.0 (1.5-2.9) p<0.001       | 544                    | 2.3 (1.6-3.3) p<0.001       |
| Getting help to have the medicines out of the box, bottle or blister pack | 576                  | 1.4 (1.0-2.0) p=0.089       | 538                    | 1.5 (1.0-2.2) p=0.051       |
| Getting help with reminding you when is the time to take your medicine?   | 575                  | 2.5 (1.7-3.6) p<0.001       | 537                    | 2.7 (1.8-3.9) p<0.001       |
| Getting help to swallow the medication                                    | 578                  | 1.5 (1.0-2.3) p=0.045       | 539                    | 1.7 (1.1-2.6) p=0.022       |
| Getting help by checking that you have taken your medicines               | 576                  | 2.4 (1.7-3.4) p<0.001       | 537                    | 2.5 (1.7-3.7) p<0.001       |
| Getting any kind of help                                                  | 587                  | 2.1 (1.4-3.0) p<0.001       | 548                    | 2.1 (1.4-3.0) p<0.001       |
| Unmet needs (participant reported more help needed)                       | 580                  | 5.3 (3.0-9.2) p<0.000       | 544                    | 5.3 (3.0-9.4) p<0.001       |

Table 4. Results of univariable and multivariable analysis showing associations with missing medicines. N: number of observations; ADLs: Activities of daily living; BI: Barthel Index.

| Variable                                                                  | Unmet needs |                                | Missing medication |                                |
|---------------------------------------------------------------------------|-------------|--------------------------------|--------------------|--------------------------------|
|                                                                           | N           | Odds ratio (95% CI)<br>p value | N                  | Odds ratio (95% CI)<br>p value |
| Age ≥70                                                                   | 498         | 0.7 (0.4-1.2) p=0.248          | 508                | 0.6 (0.4-0.9) p=0.009          |
| Gender (female)                                                           | 498         | 0.7 (0.4-1.3) p=0.262          | 508                | 0.9 (0.6-1.3) p=0.576          |
| Number of different medicines                                             | 465         | 1.2 (1.1-1.3) p<0.001          | 475                | 1.1 (1.0-1.1) p=0.015          |
| Moderate Dependence for ADLs (BI: 15-19)                                  | 408         | 2.6 (0.9-7.5) p<0.075          | 417                | 0.3 (-0.2-0.7) p=0.289         |
| Severe Dependence for ADLs (BI: 0-14)                                     | 408         | 10.9 (3.8-31.0) p<0.001        | 417                | 0.5 (-0.1-1.0) p=0.119         |
| Years since stroke                                                        | 446         | 1.0 (1.0-1.1) p=0.036          | 454                | 1.0 (0.9-1.03) p=0.725         |
| Getting help with prescriptions and collection of medication              | 487         | 4.6 (2.4-8.9) p<0.001          | 497                | 2.6 (1.8-3.8) p<0.001          |
| Getting help with taking medicines out of the box, bottle or blister pack | 481         | 6.6 (3.6-12.2) p<0.001         | 491                | 1.7 (1.1-2.6) p=0.20           |
| Getting help with reminding you when is the time to take your medicine?   | 480         | 4.7 (2.6-8.5) p<0.001          | 490                | 3.0 (2.0-4.5) p<0.001          |
| Getting help to swallow the medication                                    | 482         | 7.8 (4.2-14.8) p<0.001         | 492                | 2.1 (1.3-3.4) p=0.005          |
| Getting help by checking that you have taken your medicines               | 480         | 5.9 (3.2-10.9) p<0.001         | 490                | 2.8 (1.8-4.2) p<0.001          |
| Getting any kind of help                                                  | 491         | 5.6 (2.7-11.9) p<0.001         | 501                | 2.3 (1.6-3.4) p<0.001          |

Supplementary Appendix 1. Predictors of unmet needs and missing medication, responses given by patients only (i.e. caregivers' filled questionnaire excluded). Multivariable analyses, all models adjusted for age and gender. N: number of observations.





### QUESTIONNAIRE – PATIENT

Many people with stroke need help with taking their medicines. We would like to ask you few questions about the help you might need with taking your medicines.

How many different type of medicines do you take in one day?   
*Write the number or an approximation. Please count all medications including eye drops, injections etc.*

How old are you?  How long ago was your stroke?  years

What is your sex?  M  F

For each question below, please tick the box that best describes how you have taken your medicines in the last month:

**1. Is somebody helping with prescriptions and collection of your medicines?** all the time   
often   
sometimes   
rarely   
never

Do you feel you need more help with prescriptions and collection of your medicines?

Yes  No

**2. Is somebody helping you getting the medicines out of the box, bottle or blister pack?** all the time   
often   
sometimes   
rarely   
never

Do you feel you need more help with getting the medicines out of the box, bottle or blister pack?

Yes  No

1  
2  
3  
4  
5

6  
7  
8  
9

**3. Is somebody helping with reminding you when is the time to take your medicine?**

all the time  
often  
sometimes  
rarely  
never

10  
11  
12  
13  
14

Do you feel you need more help with reminding when is the time to take your medicine?

15  
16  
17  
18  
19  
20  
21  
22

Yes  No

23  
24  
25  
26  
27  
28  
29

**4. Is somebody helping you with swallowing your medicine? For example by giving you a drink**

all the time  
often  
sometimes  
rarely  
never

30  
31  
32  
33  
34

Do you feel you need more help with swallowing your medicine?

35  
36  
37  
38

Yes  No

39  
40  
41  
42  
43  
44  
45

**5. Is somebody helping you with checking that you have taken your medicines?**

all the time  
often  
sometimes  
rarely  
never

46  
47  
48  
49

Do you feel you need more help with checking that you have taken your medicine?

50  
51

Yes  No

52  
53

**Missing medicines**

54  
55  
56  
57

Thinking of the last 30 days, how often did you miss taking your regular medicines?

all the time  
often  
sometimes  
rarely  
never

58  
59  
60

*Remember - tick one box only*



## Barthel Questionnaire

These are some questions about your ability to look after yourself.

They may not seem to apply to you.

Please answer them all.

Tick one box in each section.

### Bathing

In the bath or shower do you:

manage on your own?

need help getting in and out?

*Remember - tick one box only*

need other help?

never have a bath or shower?

need to be washed in bed?

|  |
|--|
|  |
|  |
|  |
|  |
|  |

### Stairs

Do you climb stairs at home:

without any help?

with someone carrying your frame?

*Remember - tick one box only*

with someone encouraging you?

with physical help?

not at all?

don't have stairs?

|  |
|--|
|  |
|  |
|  |
|  |
|  |
|  |

### Dressing

Do you get dressed:

without any help?

just with help with buttons?

*Remember - tick one box only*

with someone helping you most of the time?

|  |
|--|
|  |
|  |
|  |

### Mobility

Do you walk indoors:

without any help apart from a frame?

with one person watching over you?

*Remember - tick one box only*

with one person helping you?

with more than one person helping?

not at all?

Or do you use a wheelchair independently?  
(e.g. round corners)

|  |
|--|
|  |
|  |
|  |
|  |
|  |
|  |

### Transfer

Do you move from bed to chair:

on your own?

with a little help from one person?

*Remember - tick one box only*

with a lot of help from one or more people?

not at all?

|  |
|--|
|  |
|  |
|  |
|  |

|                          |                          |                          |                          |                          |
|--------------------------|--------------------------|--------------------------|--------------------------|--------------------------|
| <input type="checkbox"/> | <input type="checkbox"/> | <input type="checkbox"/> | <input type="checkbox"/> | <input type="checkbox"/> |
|--------------------------|--------------------------|--------------------------|--------------------------|--------------------------|

1  
2  
3  
4  
5  
6  
7  
8  
9  
10  
11  
12  
13  
14  
15  
16  
17  
18  
19  
20  
21  
22  
23  
24  
25  
26  
27  
28  
29  
30  
31  
32  
33  
34  
35  
36  
37  
38  
39  
40  
41  
42  
43  
44  
45  
46  
47  
48  
49  
50  
51  
52  
53  
54  
55  
56  
57  
58  
59  
60

**Feeding**

Do you eat food: without any help?   
with help cutting food or spreading butter?   
*Remember - tick one box only* with more help?

**Toilet use**

Do you use a toilet or commode: without any help?   
with some help but can do something?   
*Remember - tick one box only* with quite a lot of help?

**Grooming**

Do you brush your hair and teeth without help?   
Wash your face and shave: with help?   
*Remember - tick one box only*

**Bladder**

Are you incontinent of urine? never   
less than once a week   
*Remember - tick one box only* less than once a day   
more often   
Or do you have a catheter managed for you

**Bowels**

Do you soil yourself? never   
Occasional accident   
*Remember - tick one box only* all the time   
or do you need someone to give you an enema?

.

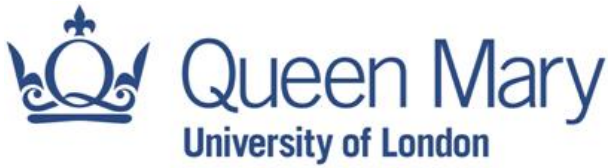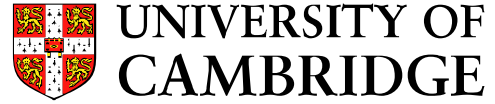

## Help with taking tablets after stroke

### FAMILY MEMBER/FRIEND OR PRIVATE CARER COPY

Many people with stroke need help with taking their medicines. We would like to ask you few questions about the help you might be offering to your family member/friend/ patient with stroke with taking medicines.

#### Relation with your family member/friend with stroke

Are you:

*Remember - tick one box only*

- partner
- son or daughter
- friend
- carer from an agency
- other
- if other, please specify

How many different types of medicines does your family member/friend/patient with stroke take in one day?  
*Write the number or an approximation. Please count all medications including eye drops, injections etc.*

How old is your family member/friend/patient with stroke? (years)

How many years ago was your family member/friend/patient's stroke?

What is your family member/friend/patient with stroke sex?

M  F

For each question below, please tick the box that best describes the help needed by your family member/friend/patient with stroke with taking medicines in the last month.

**1. Is somebody helping your family member/friend/patient with stroke with prescriptions and collection of his/her medicines?**

- all the time
- often
- sometimes
- rarely
- never

Do you feel your family member/friend/patient with stroke needs more help with prescriptions and collection of his/her medicines?

Yes

No

.

2. Is somebody helping your family member/friend/patient with stroke getting the medicines out of the box, bottle or blister pack?

all the time  
often  
sometimes  
rarely  
never

|  |
|--|
|  |
|  |
|  |
|  |
|  |

Do you feel your family member/friend/patient with stroke needs more help with getting the medicines out of the box, bottle, or blister pack?

Yes  No

3. Is somebody helping your family member/friend/patient with stroke with reminding when is time to take his/her medicine?

all the time  
often  
sometimes  
rarely  
never

|  |
|--|
|  |
|  |
|  |
|  |
|  |

Do you feel your family member/friend/patient with stroke needs more help with reminding when is time to take his/her medicine?

Yes  No

4. Is somebody helping your family member/friend/patient with stroke with swallowing his/her medicine? For example by giving a drink.

all the time  
often  
sometimes  
rarely  
never

|  |
|--|
|  |
|  |
|  |
|  |
|  |

Do you feel you your family member/friend/patient with stroke need more help with swallowing his/her medicine?

Yes  No

5. Is somebody helping your family member/friend/patient with stroke with checking that he/she has taken his/her medicines?

all the time  
often  
sometimes  
rarely  
never

|  |
|--|
|  |
|  |
|  |
|  |
|  |

Do you feel your family member/friend/patient with stroke needs more help with checking that he/she has taken his/her medicine?

Yes  No



**Missing medicines**

Thinking of the last 30 days, how often did your family member/friend/patient with stroke miss taking his/her regular medicines?

- all the time
- often
- sometimes
- rarely
- never

|  |
|--|
|  |
|  |
|  |
|  |
|  |

*Remember - tick one box only*

**Barthel Questionnaire**

These are some questions about the ability of your family member/friend/patient with stroke to look after him/herself.

Please answer them all.

Please fill this questionnaire even if you are not regularly caring for your family member/friend/patient with stroke, trying to answer questions in the way you think most accurately describes the disability of your family member/friend/patient with stroke.

Tick one box in each section.

**Bathing**

In the bath or shower do you:

- manage on your own?
- need help getting in and out?
- need other help?
- never have a bath or shower?
- need to be washed in bed?

|  |
|--|
|  |
|  |
|  |
|  |
|  |

*Remember - tick one box only*

**Stairs**

Do you climb stairs at home:

- without any help?
- with someone carrying your frame?
- with someone encouraging you?
- with physical help?
- not at all?
- don't have stairs?

|  |
|--|
|  |
|  |
|  |
|  |
|  |
|  |

*Remember - tick one box only*

**Dressing**

Do you get dressed:

- without any help?
- just with help with buttons?
- with someone helping you most of the time?

|  |
|--|
|  |
|  |
|  |

*Remember - tick one box only*

**Mobility**

Do you walk indoors:

- without any help apart from a frame?
- with one person watching over you?
- with one person helping you?

|  |
|--|
|  |
|  |
|  |

*Remember - tick one box only*

.

with more than one person helping?  
not at all?  
Or do you use a wheelchair independently?  
(e.g. round corners)

**Transfer**

Do you move from bed to chair:  
*Remember - tick one box only*

on your own?  
with a little help from one person?  
with a lot of help from one or more people?  
not at all?

**Feeding**

Do you eat food:  
*Remember - tick one box only*

without any help?  
with help cutting food or spreading butter?  
with more help?

**Toilet use**

Do you use a toilet or commode:  
*Remember - tick one box only*

without any help?  
with some help but can do something?  
with quite a lot of help?

**Grooming**

Do you brush your hair and teeth  
Wash your face and shave:  
*Remember - tick one box only*

without help?  
with help?

**Bladder**

Are you incontinent of urine?  
*Remember - tick one box only*

never  
less than once a week  
less than once a day  
more often  
Or do you have a catheter managed for you

**Bowels**

Do you soil yourself?  
*Remember - tick one box only*

never  
Occasional accident  
all the time  
or do you need someone to give you an enema?



**STROBE 2007 (v4) Statement—Checklist of items that should be included in reports of *cross-sectional studies***

| Section/Topic                | Item # | Recommendation                                                                                                                                                                       | Reported on page # |
|------------------------------|--------|--------------------------------------------------------------------------------------------------------------------------------------------------------------------------------------|--------------------|
| Title and abstract           | 1      | (a) Indicate the study’s design with a commonly used term in the title or the abstract                                                                                               | 2                  |
|                              |        | (b) Provide in the abstract an informative and balanced summary of what was done and what was found                                                                                  | 2                  |
| <b>Introduction</b>          |        |                                                                                                                                                                                      |                    |
| Background/rationale         | 2      | Explain the scientific background and rationale for the investigation being reported                                                                                                 | 4-5                |
| Objectives                   | 3      | State specific objectives, including any pre-specified hypotheses                                                                                                                    | 5                  |
| <b>Methods</b>               |        |                                                                                                                                                                                      |                    |
| Study design                 | 4      | Present key elements of study design early in the paper                                                                                                                              | 5-6                |
| Setting                      | 5      | Describe the setting, locations, and relevant dates, including periods of recruitment, exposure, follow-up, and data collection                                                      | 6                  |
| Participants                 | 6      | (a) Give the eligibility criteria, and the sources and methods of selection of participants                                                                                          | 6-7                |
| Variables                    | 7      | Clearly define all outcomes, exposures, predictors, potential confounders, and effect modifiers. Give diagnostic criteria, if applicable                                             | 9                  |
| Data sources/<br>measurement | 8*     | For each variable of interest, give sources of data and details of methods of assessment (measurement). Describe comparability of assessment methods if there is more than one group | 8                  |
| Bias                         | 9      | Describe any efforts to address potential sources of bias                                                                                                                            | -                  |
| Study size                   | 10     | Explain how the study size was arrived at                                                                                                                                            | 6                  |
| Quantitative variables       | 11     | Explain how quantitative variables were handled in the analyses. If applicable, describe which groupings were chosen and why                                                         | 8-9                |
| Statistical methods          | 12     | (a) Describe all statistical methods, including those used to control for confounding                                                                                                | 8-9                |
|                              |        | (b) Describe any methods used to examine subgroups and interactions                                                                                                                  | 8-9                |
|                              |        | (c) Explain how missing data were addressed                                                                                                                                          | -                  |
|                              |        | (d) If applicable, describe analytical methods taking account of sampling strategy                                                                                                   | -                  |
|                              |        | (e) Describe any sensitivity analyses                                                                                                                                                | -                  |

|                          |     |                                                                                                                                                                                                                                                                                                                                                                                                               |                 |
|--------------------------|-----|---------------------------------------------------------------------------------------------------------------------------------------------------------------------------------------------------------------------------------------------------------------------------------------------------------------------------------------------------------------------------------------------------------------|-----------------|
|                          |     |                                                                                                                                                                                                                                                                                                                                                                                                               |                 |
| <b>Results</b>           |     |                                                                                                                                                                                                                                                                                                                                                                                                               |                 |
| Participants             | 13* | (a) Report numbers of individuals at each stage of study—eg numbers potentially eligible, examined for eligibility, confirmed eligible, included in the study, completing follow-up, and analysed<br>(b) Give reasons for non-participation at each stage                                                                                                                                                     | 10<br>-         |
|                          |     | (c) Consider use of a flow diagram                                                                                                                                                                                                                                                                                                                                                                            | -               |
| Descriptive data         | 14* | (a) Give characteristics of study participants (eg demographic, clinical, social) and information on exposures and potential confounders<br>(b) Indicate number of participants with missing data for each variable of interest                                                                                                                                                                               | 10<br>-         |
| Outcome data             | 15* | Report numbers of outcome events or summary measures                                                                                                                                                                                                                                                                                                                                                          |                 |
| Main results             | 16  | (a) Give unadjusted estimates and, if applicable, confounder-adjusted estimates and their precision (eg, 95% confidence interval). Make clear which confounders were adjusted for and why they were included<br>(b) Report category boundaries when continuous variables were categorized<br>(c) If relevant, consider translating estimates of relative risk into absolute risk for a meaningful time period | 11-12<br>-<br>- |
| Other analyses           | 17  | Report other analyses done—eg analyses of subgroups and interactions, and sensitivity analyses                                                                                                                                                                                                                                                                                                                | -               |
| <b>Discussion</b>        |     |                                                                                                                                                                                                                                                                                                                                                                                                               |                 |
| Key results              | 18  | Summarise key results with reference to study objectives                                                                                                                                                                                                                                                                                                                                                      | 12-13           |
| Limitations              | 19  | Discuss limitations of the study, taking into account sources of potential bias or imprecision. Discuss both direction and magnitude of any potential bias                                                                                                                                                                                                                                                    | 13-14           |
| Interpretation           | 20  | Give a cautious overall interpretation of results considering objectives, limitations, multiplicity of analyses, results from similar studies, and other relevant evidence                                                                                                                                                                                                                                    | 14-16           |
| Generalisability         | 21  | Discuss the generalisability (external validity) of the study results                                                                                                                                                                                                                                                                                                                                         | 17              |
| <b>Other information</b> |     |                                                                                                                                                                                                                                                                                                                                                                                                               |                 |
| Funding                  | 22  | Give the source of funding and the role of the funders for the present study and, if applicable, for the original study on which the present article is based                                                                                                                                                                                                                                                 | 3               |

\*Give information separately for cases and controls in case-control studies and, if applicable, for exposed and unexposed groups in cohort and cross-sectional studies.

**Note:** An Explanation and Elaboration article discusses each checklist item and gives methodological background and published examples of transparent reporting. The STROBE checklist is best used in conjunction with this article (freely available on the Web sites of PLoS Medicine at <http://www.plosmedicine.org/>, Annals of Internal Medicine at <http://www.annals.org/>, and Epidemiology at <http://www.epidem.com/>). Information on the STROBE Initiative is available at [www.strobe-statement.org](http://www.strobe-statement.org).
