# Supplementary material for: Evaluating practical support stroke survivors get with medicines and unmet needs in primary care: a survey
Source: PubMed Central journal article supplement (PMC5855212; doi:10.1136/bmjopen-2017-019874), 2018-03-11
Supplement: bmjopen-2017-019874supp003.pdf [file bmjopen-2017-019874supp003.pdf]

| Variable                                                                  | Unmet needs |                                | Missing medication |                                |
|---------------------------------------------------------------------------|-------------|--------------------------------|--------------------|--------------------------------|
|                                                                           | N           | Odds ratio (95% CI)<br>p value | N                  | Odds ratio (95% CI)<br>p value |
| Age ≥70                                                                   | 498         | 0.7 (0.4-1.2) p=0.248          | 508                | 0.6 (0.4-0.9) p=0.009          |
| Gender (female)                                                           | 498         | 0.7 (0.4-1.3) p=0.262          | 508                | 0.9 (0.6-1.3) p=0.576          |
| Number of different medicines                                             | 465         | 1.2 (1.1-1.3) p<0.001          | 475                | 1.1 (1.0-1.1) p=0.015          |
| Moderate Dependence for ADLs (BI: 15-19)                                  | 408         | 2.6 (0.9-7.5) p<0.075          | 417                | 0.3 (-0.2-0.7) p=0.289         |
| Severe Dependence for ADLs (BI: 0-14)                                     | 408         | 10.9 (3.8-31.0) p<0.001        | 417                | 0.5 (-0.1-1.0) p=0.119         |
| Years since stroke                                                        | 446         | 1.0 (1.0-1.1) p=0.036          | 454                | 1.0 (0.9-1.03) p=0.725         |
| Getting help with prescriptions and collection of medication              | 487         | 4.6 (2.4-8.9) p<0.001          | 497                | 2.6 (1.8-3.8) p<0.001          |
| Getting help with taking medicines out of the box, bottle or blister pack | 481         | 6.6 (3.6-12.2) p<0.001         | 491                | 1.7 (1.1-2.6) p=0.20           |
| Getting help with reminding you when is the time to take your medicine?   | 480         | 4.7 (2.6-8.5) p<0.001          | 490                | 3.0 (2.0-4.5) p<0.001          |
| Getting help to swallow the medication                                    | 482         | 7.9 (4.2-14.8) p<0.001         | 492                | 2.1 (1.3-3.4) p=0.005          |
| Getting help by checking that you have taken your medicines               | 480         | 5.9 (3.2-10.9) p<0.001         | 490                | 2.8 (1.8-4.2) p<0.001          |
| Getting any kind of help                                                  | 491         | 5.6 (2.7-11.9) p<0.001         | 501                | 2.3 (1.6-3.4) p<0.001          |

Supplementary Appendix 1. Predictors of unmet needs and missing medication, responses given by patients only (i.e. caregivers' filled questionnaire excluded). Multivariable analyses, all models adjusted for age and gender. N: number of observations.
