# Supplementary material for: Evaluating practical support stroke survivors get with medicines and unmet needs in primary care: a survey
Source: BMJ Open. 2018 Mar 11;8(3):e019874. doi: 10.1136/bmjopen-2017-019874 (PMC5855212; doi:10.1136/bmjopen-2017-019874)
Supplement: Supplementary data [file bmjopen-2017-019874supp002.pdf]

· 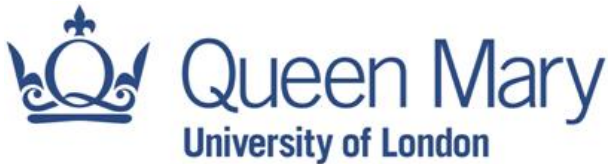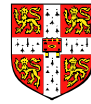

UNIVERSITY OF  
CAMBRIDGE

## Help with taking tablets after stroke

### FAMILY MEMBER/FRIEND OR PRIVATE CARER COPY

Many people with stroke need help with taking their medicines. We would like to ask you few questions about the help you might be offering to your family member/friend/ patient with stroke with taking medicines.

#### Relation with your family member/friend with stroke

Are you:

*Remember - tick one box only*

partner  
son or daughter  
friend  
carer from an agency  
other  
if other, please specify  
-----

☐  
☐  
☐  
☐  
☐

How many different types of medicines does your family member/friend/patient with stroke take in one day?  
*Write the number or an approximation. Please count all medications including eye drops, injections etc.*

How old is your family member/friend/patient with stroke? (years)

How many years ago was your family member/friend/patient's stroke?

What is your family member/friend/patient with stroke sex?

☐ M☐ F

For each question below, please tick the box that best describes the help needed by your family member/friend/patient with stroke with taking medicines in the last month.

**1. Is somebody helping your family member/friend/patient with stroke with prescriptions and collection of his/her medicines?**

all the time  
often  
sometimes  
rarely  
never

☐  
☐  
☐  
☐  
☐

Do you feel your family member/friend/patient with stroke needs more help with prescriptions and collection of his/her medicines?

Yes

☐

No

☐

|  |  |   |  |  |  |
|--|--|---|--|--|--|
|  |  | . |  |  |  |
|--|--|---|--|--|--|

**2. Is somebody helping your family member/friend/patient with stroke getting the medicines out of the box, bottle or blister pack?**

all the time  
often  
sometimes  
rarely  
never

|  |
|--|
|  |
|  |
|  |
|  |
|  |

Do you feel your family member/friend/patient with stroke needs more help with getting the medicines out of the box, bottle, or blister pack?

**Yes**

☐

**No**

☐

**3. Is somebody helping your family member/friend/patient with stroke with reminding when is time to take his/her medicine?**

all the time  
often  
sometimes  
rarely  
never

|  |
|--|
|  |
|  |
|  |
|  |
|  |

Do you feel your family member/friend/patient with stroke needs more help with reminding when is time to take his/her medicine?

**Yes**

☐

**No**

☐

**4. Is somebody helping your family member/friend/patient with stroke with swallowing his/her medicine?  
For example by giving a drink.**

all the time  
often  
sometimes  
rarely  
never

|  |
|--|
|  |
|  |
|  |
|  |
|  |

Do you feel you your family member/friend/patient with stroke need more help with swallowing his/her medicine?

**Yes**

☐

**No**

☐

**5. Is somebody helping your family member/friend/patient with stroke with checking that he/she has taken his/her medicines?**

all the time  
often  
sometimes  
rarely  
never

|  |
|--|
|  |
|  |
|  |
|  |
|  |

Do you feel your family member/friend/patient with stroke needs more help with checking that he/she has taken his/her medicine?

**Yes**

☐

**No**

☐

|  |  |   |  |  |  |
|--|--|---|--|--|--|
|  |  | . |  |  |  |
|--|--|---|--|--|--|

## Missing medicines

Thinking of the last 30 days, how often did your family member/friend/patient with stroke miss taking his/her regular medicines?

*Remember - tick one box only*

all the time  
often  
sometimes  
rarely  
never

|  |
|--|
|  |
|  |
|  |
|  |
|  |

## Barthel Questionnaire

These are some questions about the ability of your family member/friend/patient with stroke to look after him/herself.

Please answer them all.

Please fill this questionnaire even if you are not regularly caring for your family member/friend/patient with stroke, trying to answer questions in the way you think most accurately describes the disability of your family member/friend/patient with stroke.

Tick one box in each section.

### Bathing

In the bath or shower do you:

*Remember - tick one box only*

manage on your own?  
need help getting in and out?  
need other help?  
never have a bath or shower?  
need to be washed in bed?

|  |
|--|
|  |
|  |
|  |
|  |
|  |

### Stairs

Do you climb stairs at home:

*Remember - tick one box only*

without any help?  
with someone carrying your frame?  
with someone encouraging you?  
with physical help?  
not at all?  
don't have stairs?

|  |
|--|
|  |
|  |
|  |
|  |
|  |
|  |

### Dressing

Do you get dressed:

*Remember - tick one box only*

without any help?  
just with help with buttons?  
with someone helping you most of the time?

|  |
|--|
|  |
|  |
|  |

### Mobility

Do you walk indoors:

*Remember - tick one box only*

without any help apart from a frame?  
with one person watching over you?  
with one person helping you?

|  |
|--|
|  |
|  |
|  |

|  |  |   |  |  |  |
|--|--|---|--|--|--|
|  |  | . |  |  |  |
|--|--|---|--|--|--|

with more than one person helping?  
 not at all?  
 Or do you use a wheelchair independently?  
 (e.g. round corners)

|  |
|--|
|  |
|  |
|  |

## Transfer

Do you move from bed to chair:  
*Remember - tick one box only*

on your own?  
 with a little help from one person?  
 with a lot of help from one or more people?  
 not at all?

|  |
|--|
|  |
|  |
|  |
|  |

## Feeding

Do you eat food:  
*Remember - tick one box only*

without any help?  
 with help cutting food or spreading butter?  
 with more help?

|  |
|--|
|  |
|  |
|  |

## Toilet use

Do you use a toilet or commode:  
*Remember - tick one box only*

without any help?  
 with some help but can do something?  
 with quite a lot of help?

|  |
|--|
|  |
|  |
|  |

## Grooming

Do you brush your hair and teeth  
 Wash your face and shave:  
*Remember - tick one box only*

without help?  
 with help?

|  |
|--|
|  |
|  |

## Bladder

Are you incontinent of urine?  
*Remember - tick one box only*

never  
 less than once a week  
 less than once a day  
 more often  
 Or do you have a catheter managed for you

|  |
|--|
|  |
|  |
|  |
|  |
|  |

## Bowels

Do you soil yourself?  
*Remember - tick one box only*

never  
 Occasional accident  
 all the time  
 or do you need someone to give you an enema?

|  |
|--|
|  |
|  |
|  |
|  |
